# Supplementary material for: New Compounds with Bioisosteric Replacement of Classic Choline Kinase Inhibitors Show Potent Antiplasmodial Activity
Source: MDPI journal article supplement (doi:10.3390/pharmaceutics13111842), 2021-11-02
Supplement: s1 [file s1]

# Supplementary Materials: New Compounds with Bioisosteric Replacement of Classic Choline Kinase Inhibitors Show Potent Antiplasmodial Activity

Francisco José Aguilar-Troyano, Archimede Torretta, Gianluca Rubbini, Alberto Fasiolo, Pilar María Luque-Navarro, María Paz Carrasco-Jimenez, Guiomar Pérez-Moreno, Cristina Bosch-Navarrete, Dolores González-Pacanowska, Emilio Parisini and Luisa Carlota Lopez-Cara

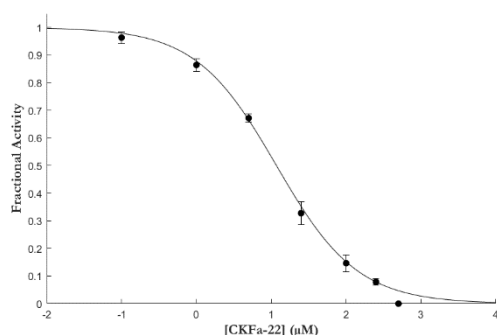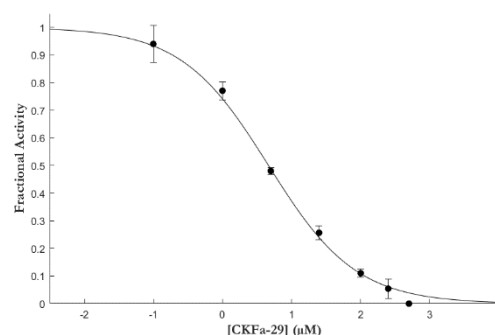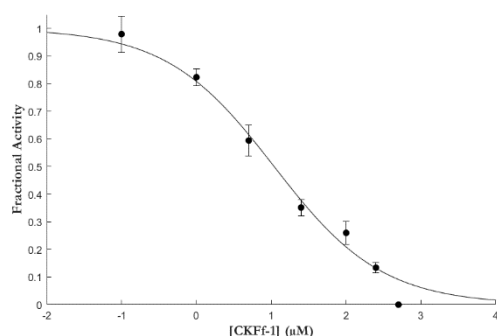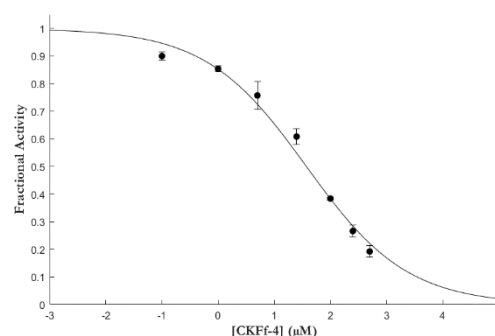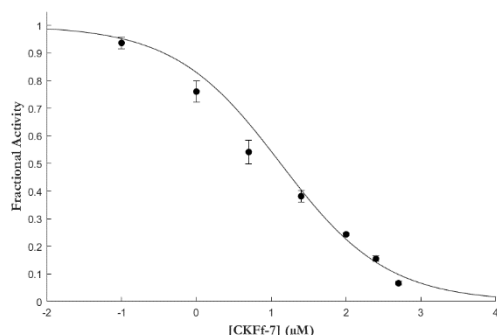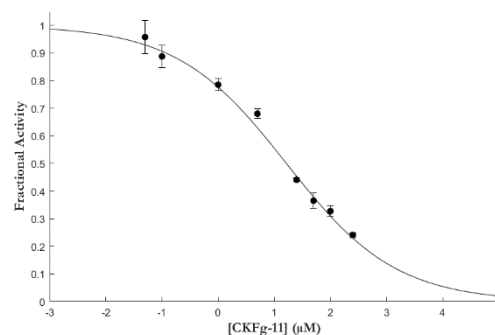

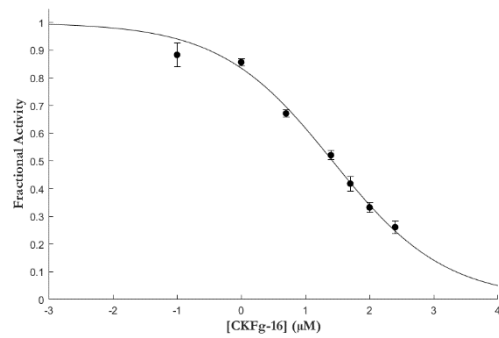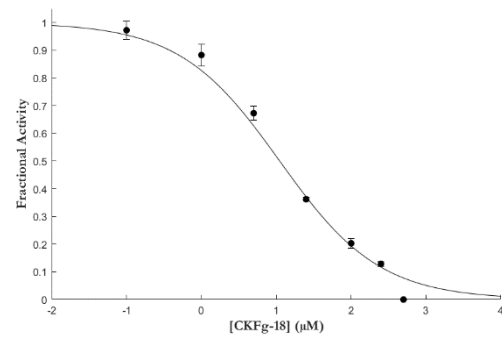

**Figure S1.** IC<sub>50</sub> Curves Inhibition of *Pf*CK.

**CKF-aM2**

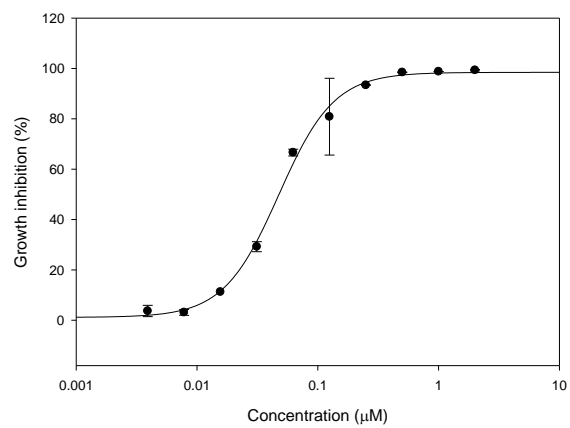

**CKF-aM1**

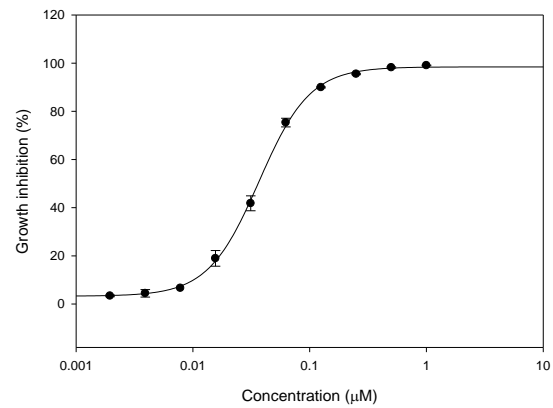

**CKF-aM3**

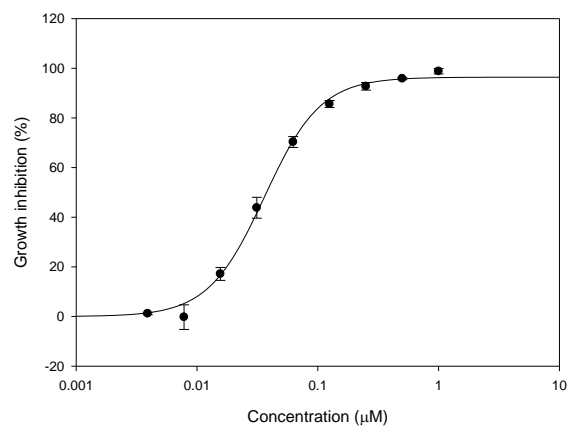

**CKFg-9**

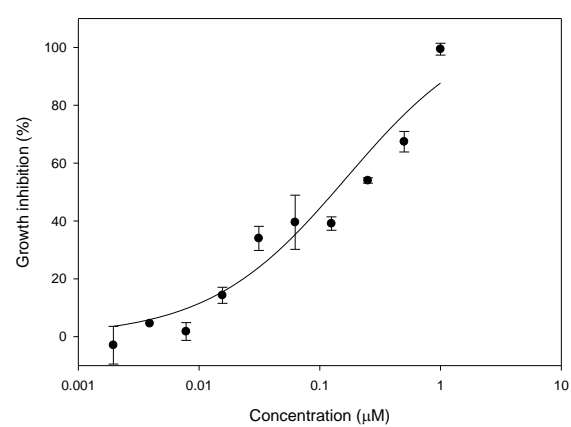

CKFa-21

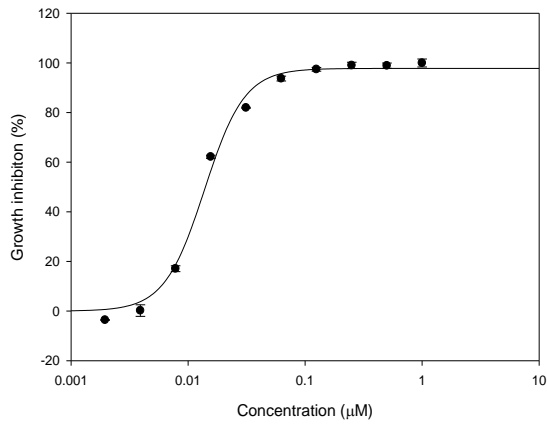

CKFg-14

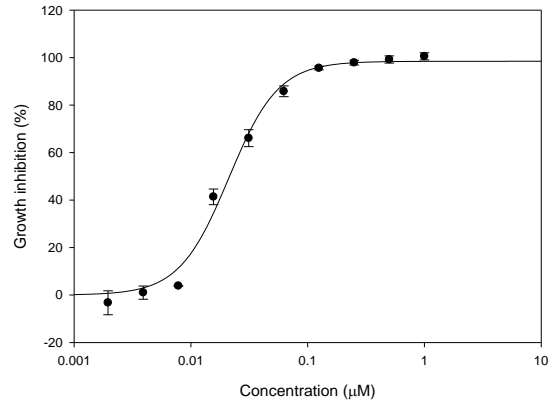

CKF-a24

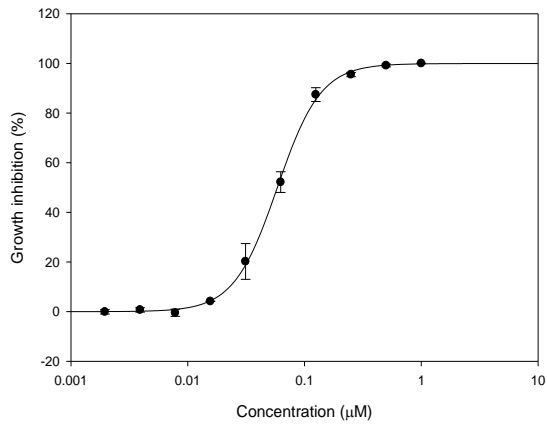

CKFg-30

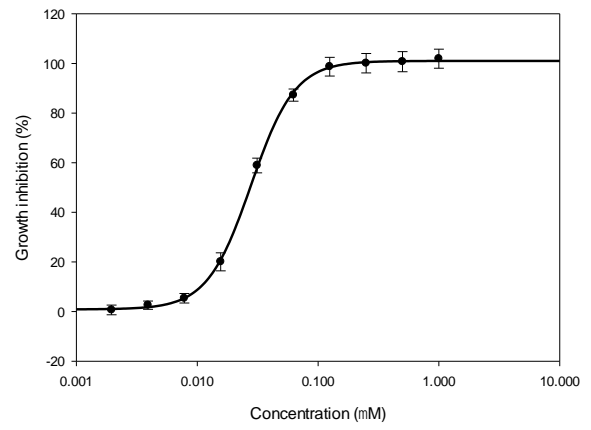

CKFg-30

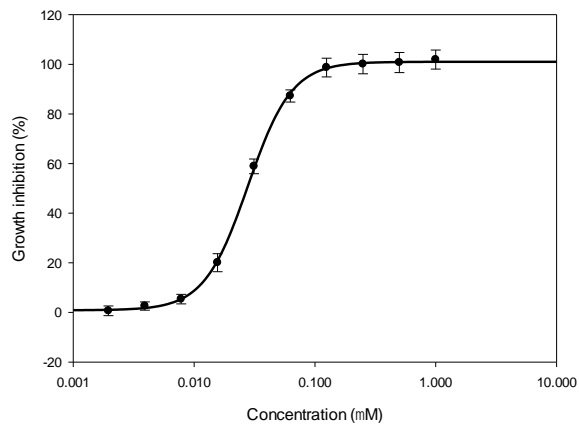

CKF-g10

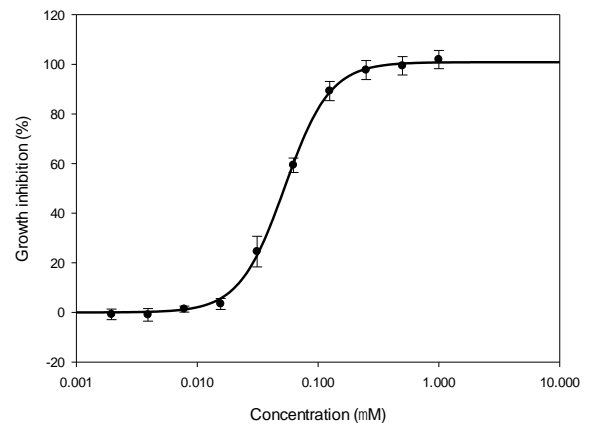

CKF-a22

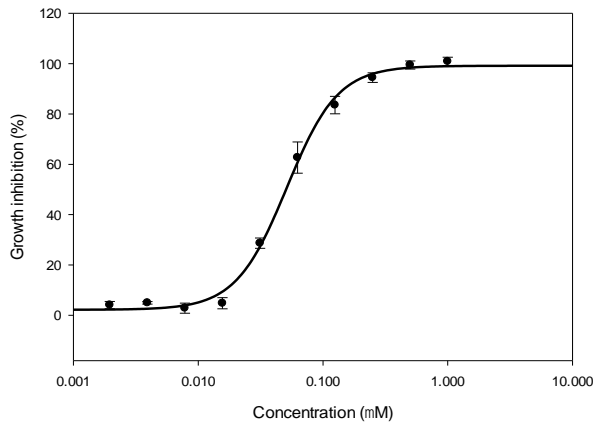

14CKF-g18

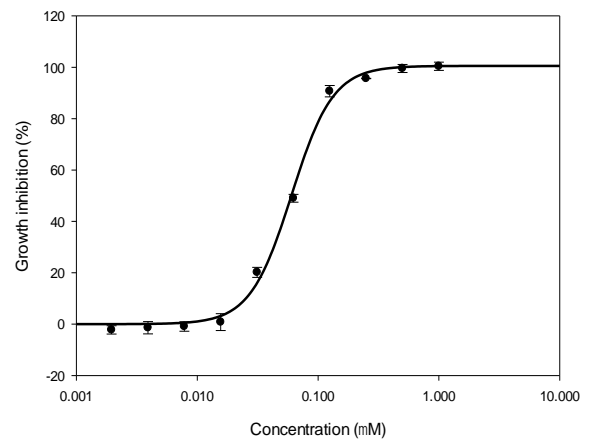

CKFp-1

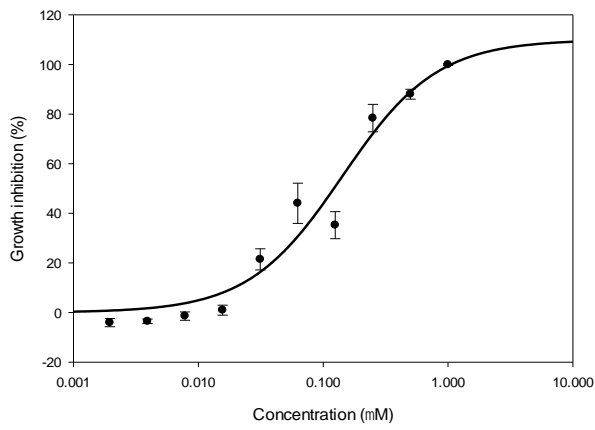

CKFp-8

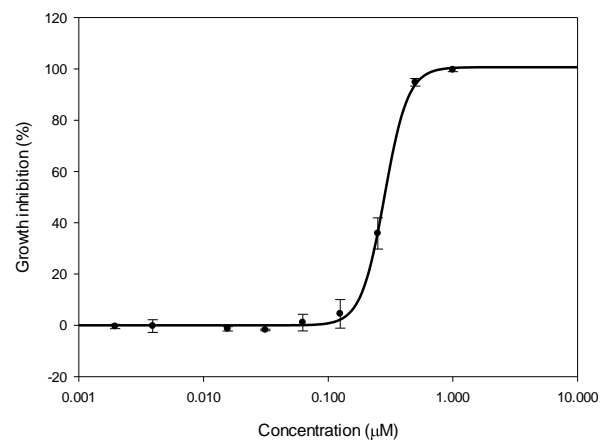

CKFg-12

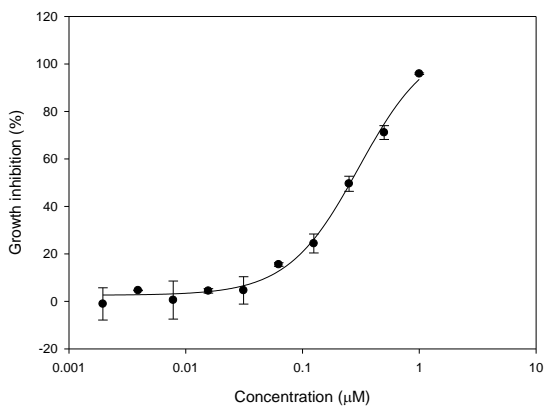

CKFg-17

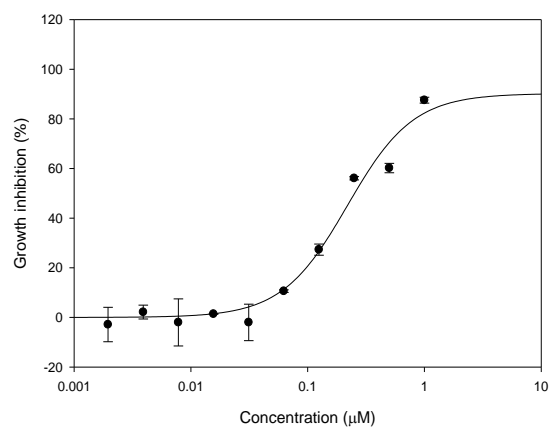

CKFg-13

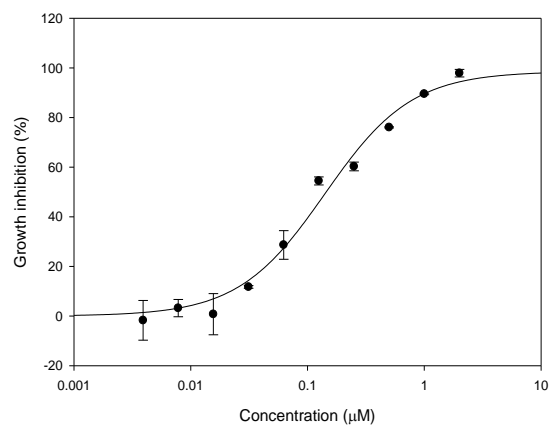

CKFa-27

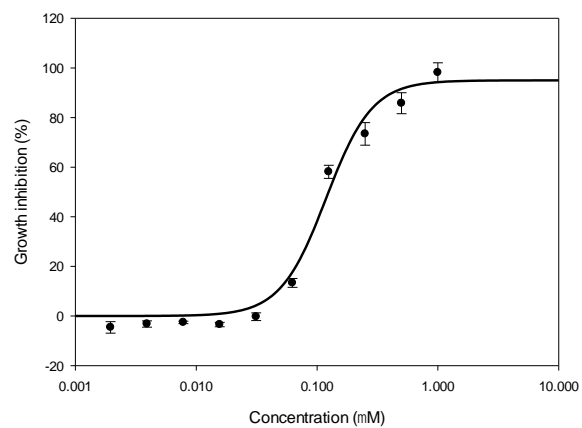

CKF-a26

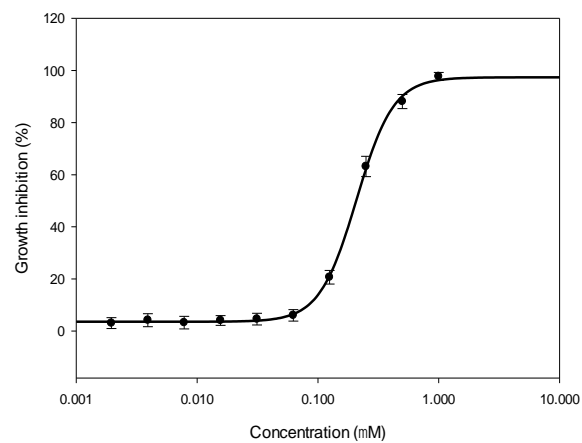

CKFg-20

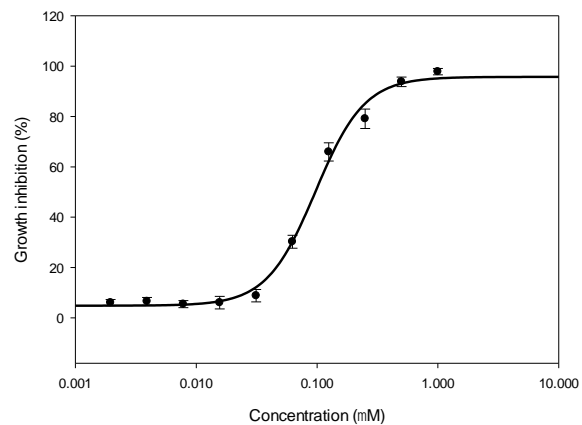

CKFg-11

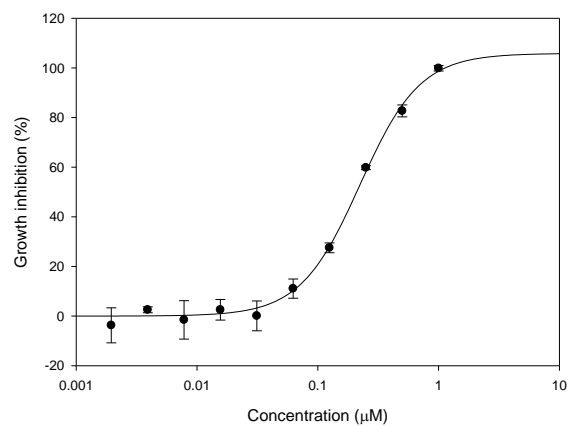

CKFg-16

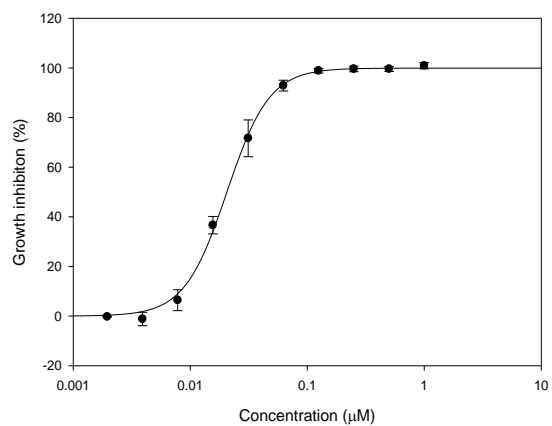

CKFg-15

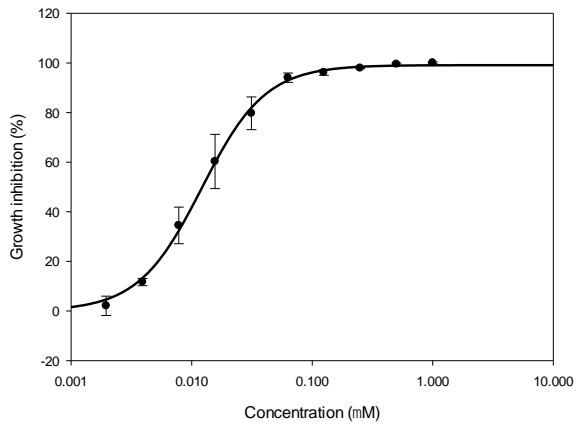

CKF-a25

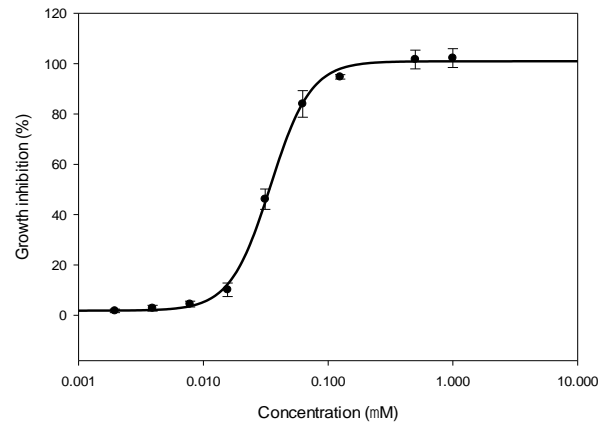

CKFg-31

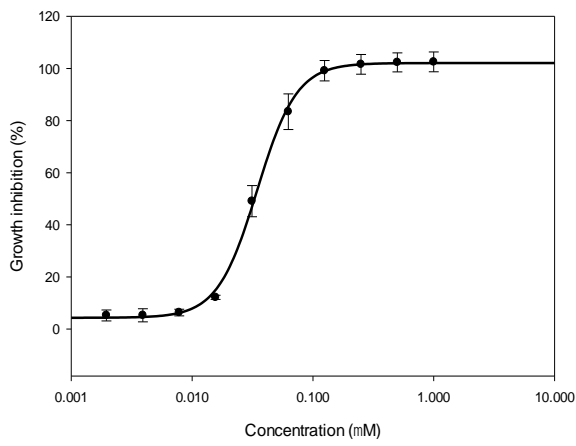

CKF-a23

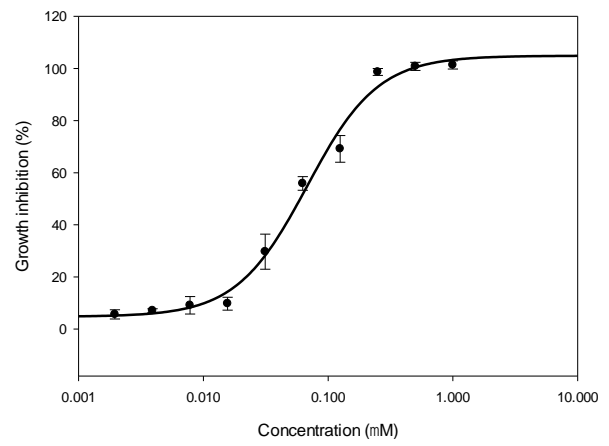

CKF-g19

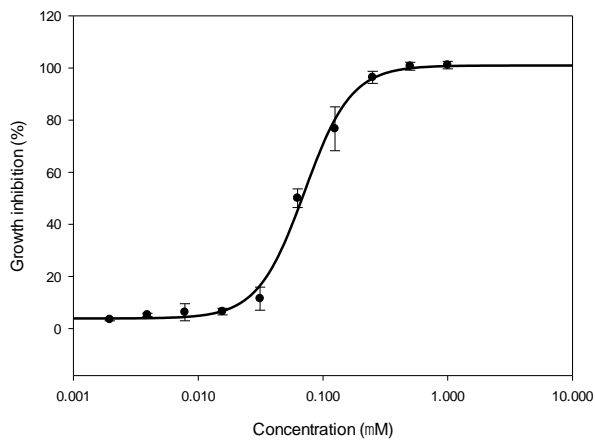

CKFf-1

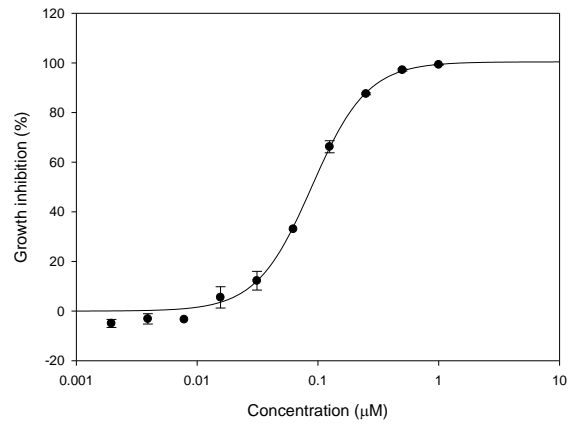

CKFf-7

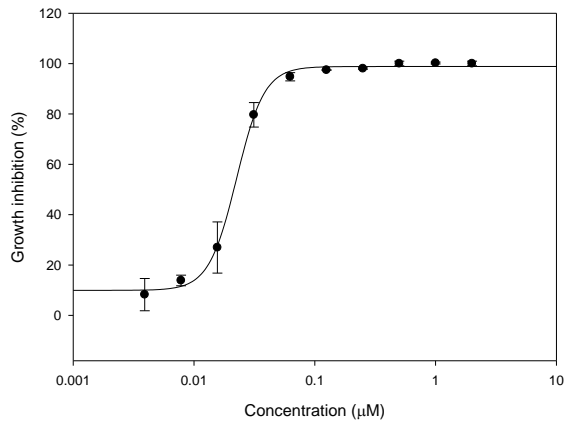

CKFf-3

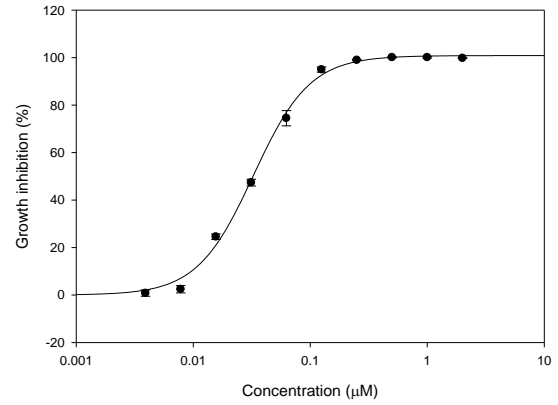

CKFa-33

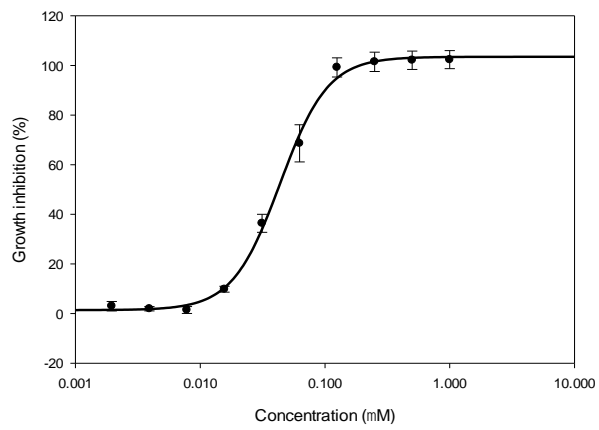

CKFa-29

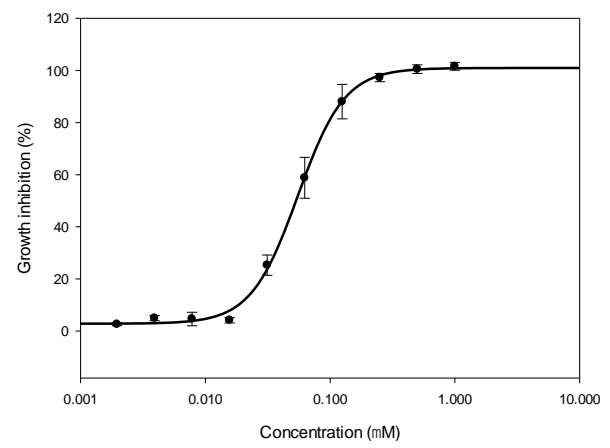

CKFf-35

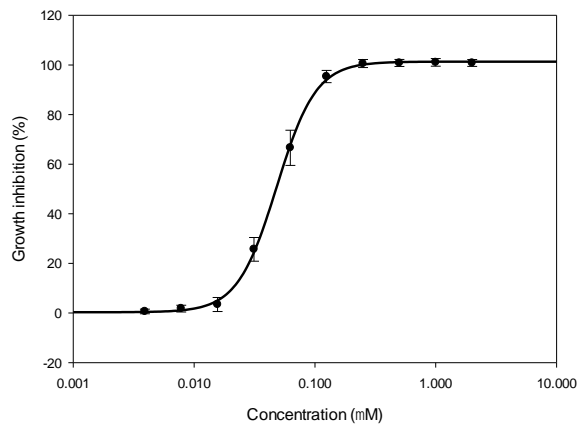

CKFf-2

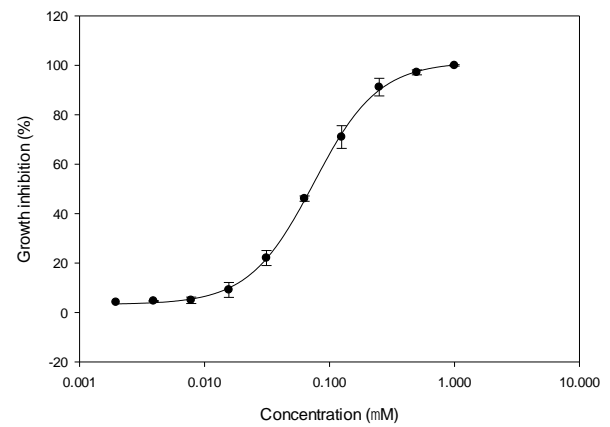

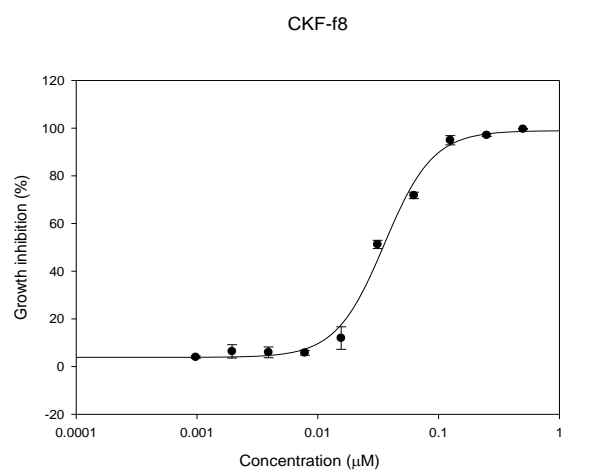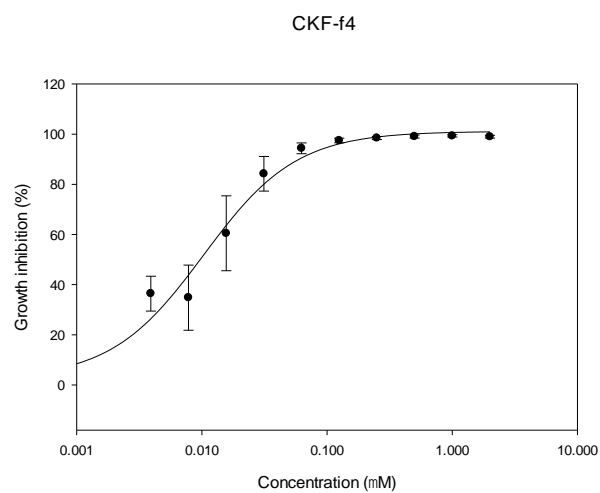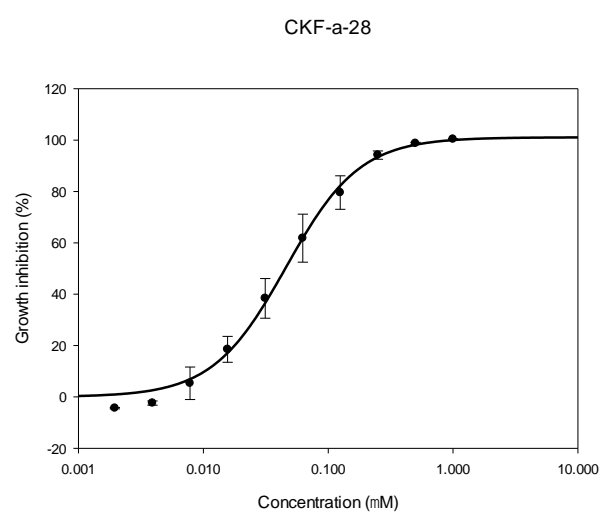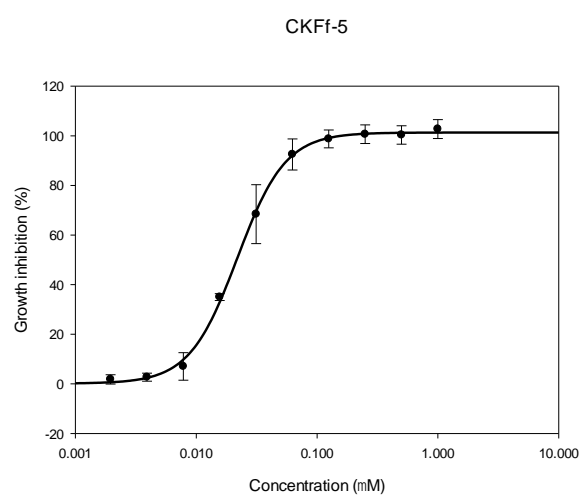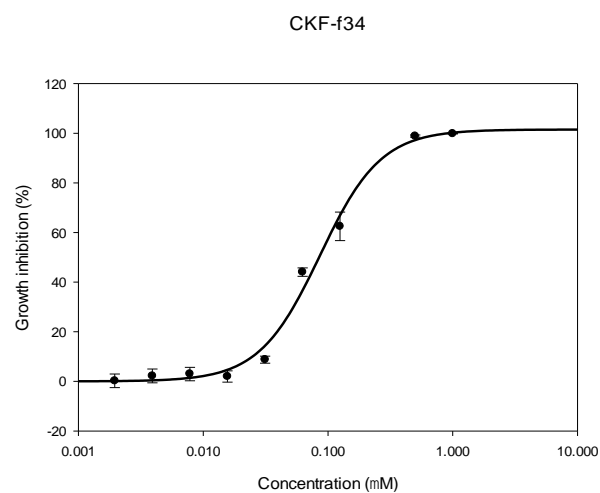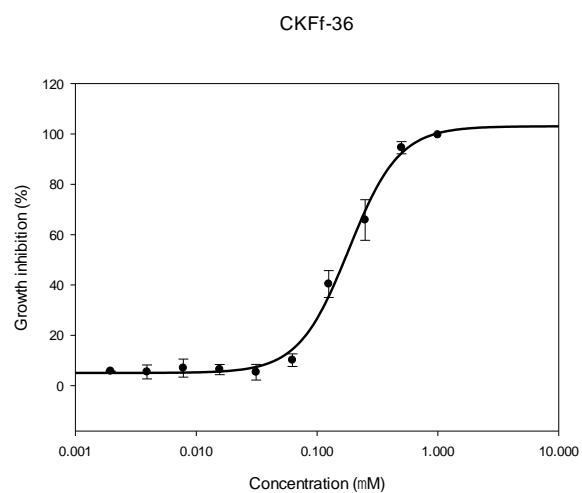

Figure S2. IC<sub>50</sub> Curves.



# Fa-M2

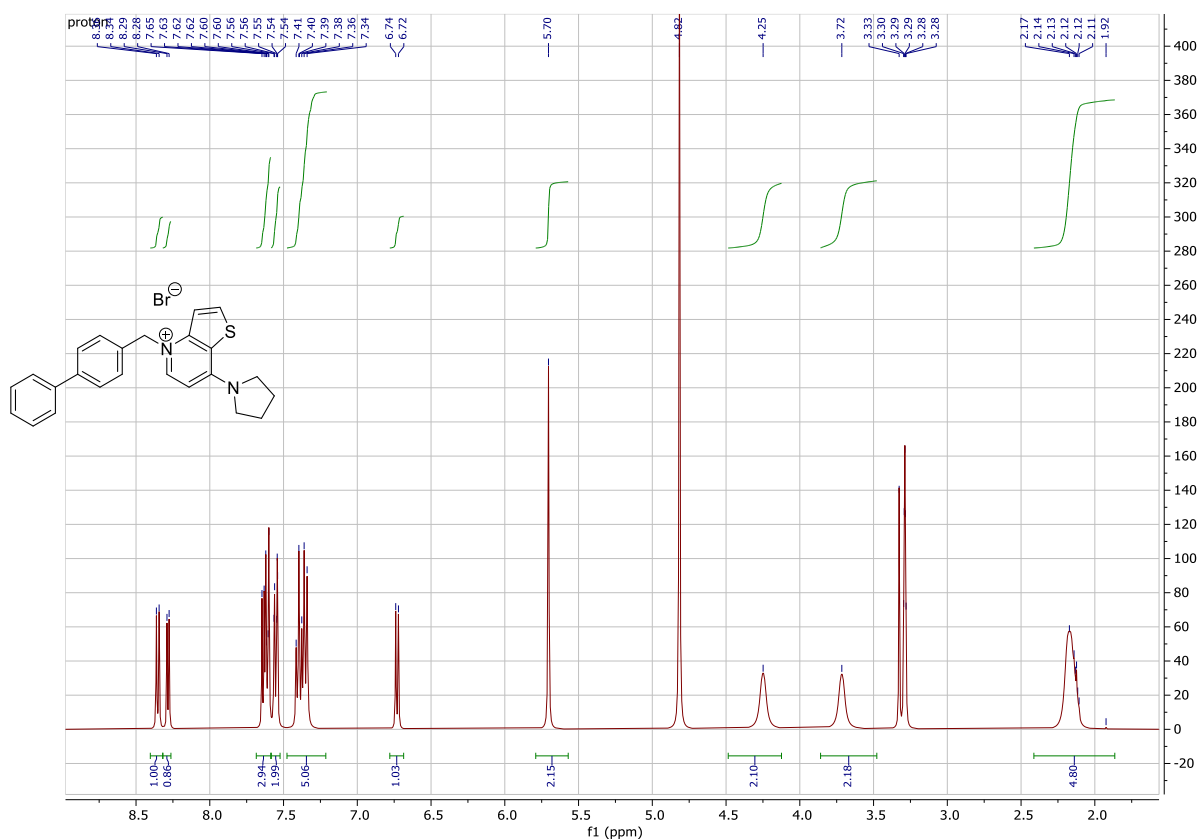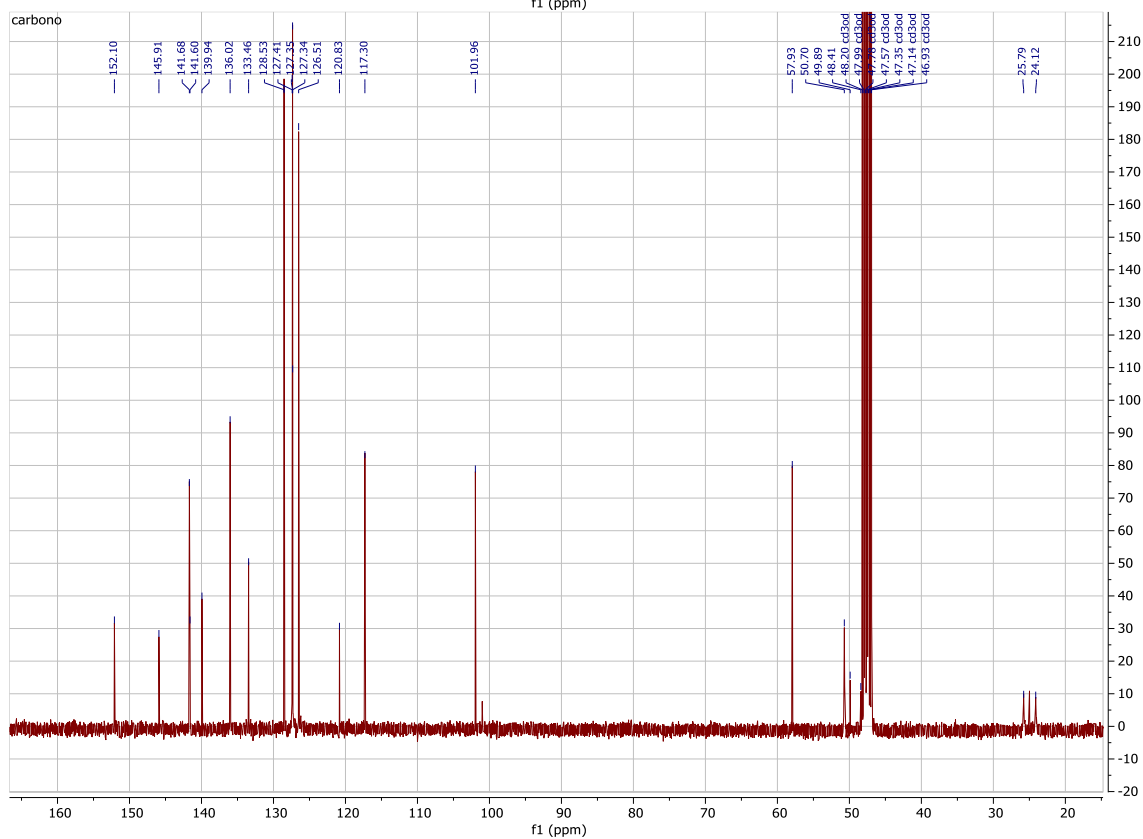

**Fa-M1**

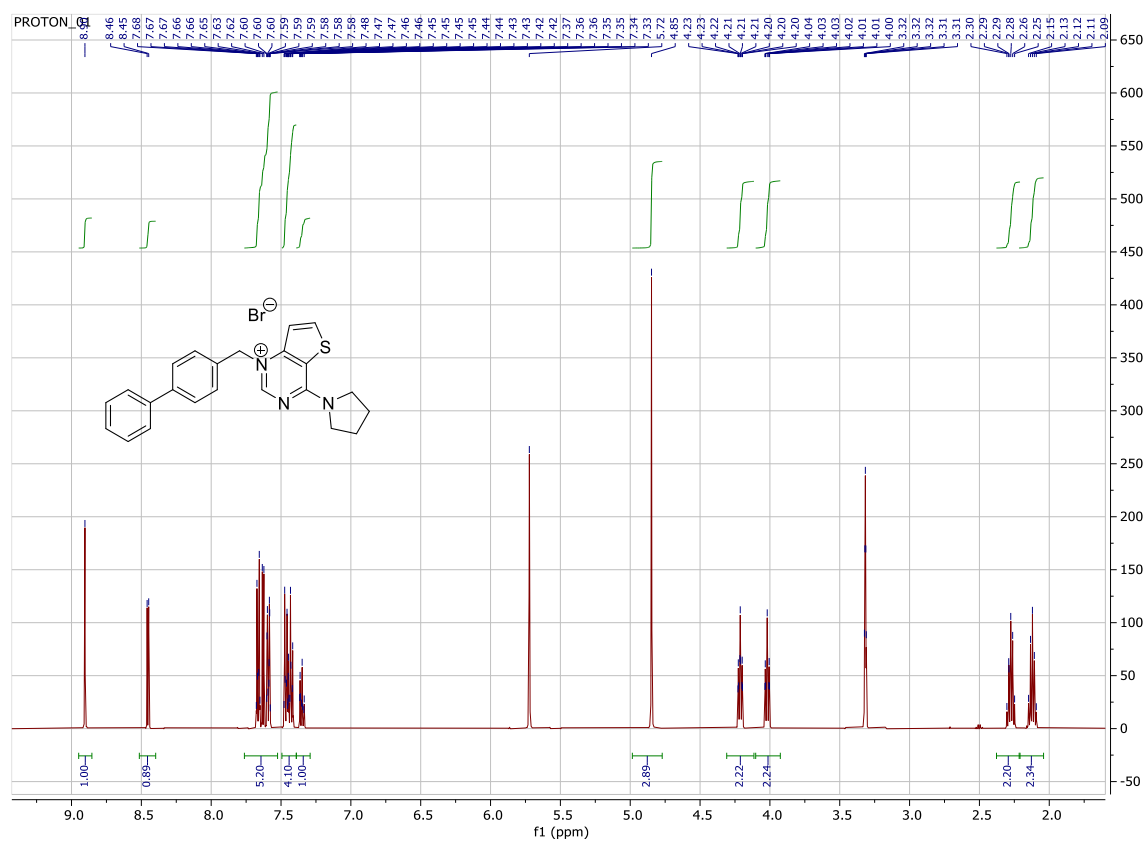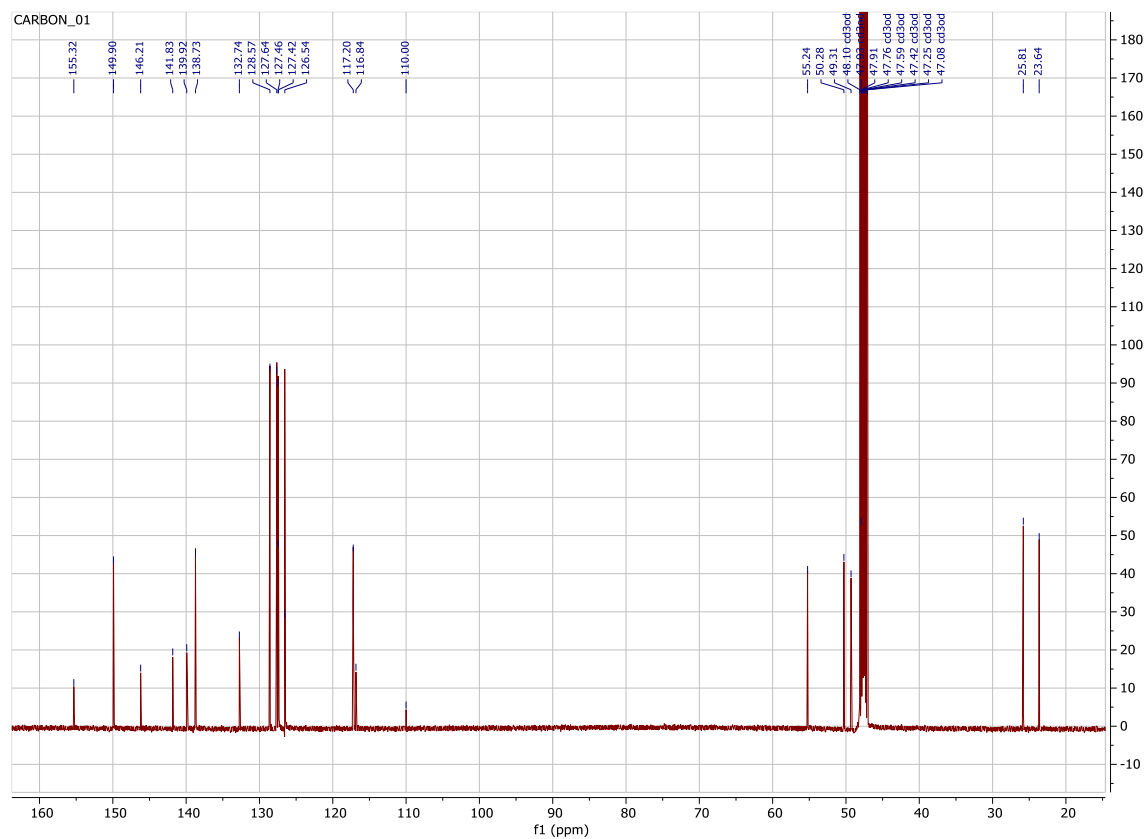

# FMa-3

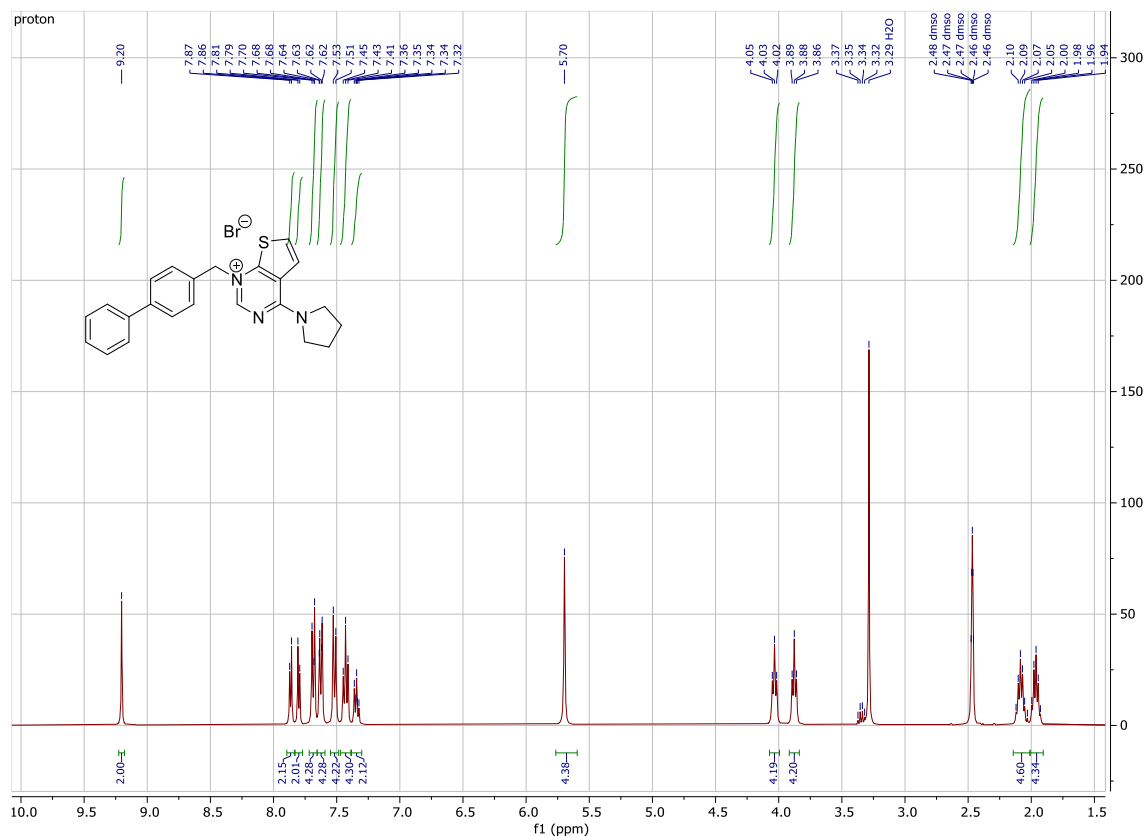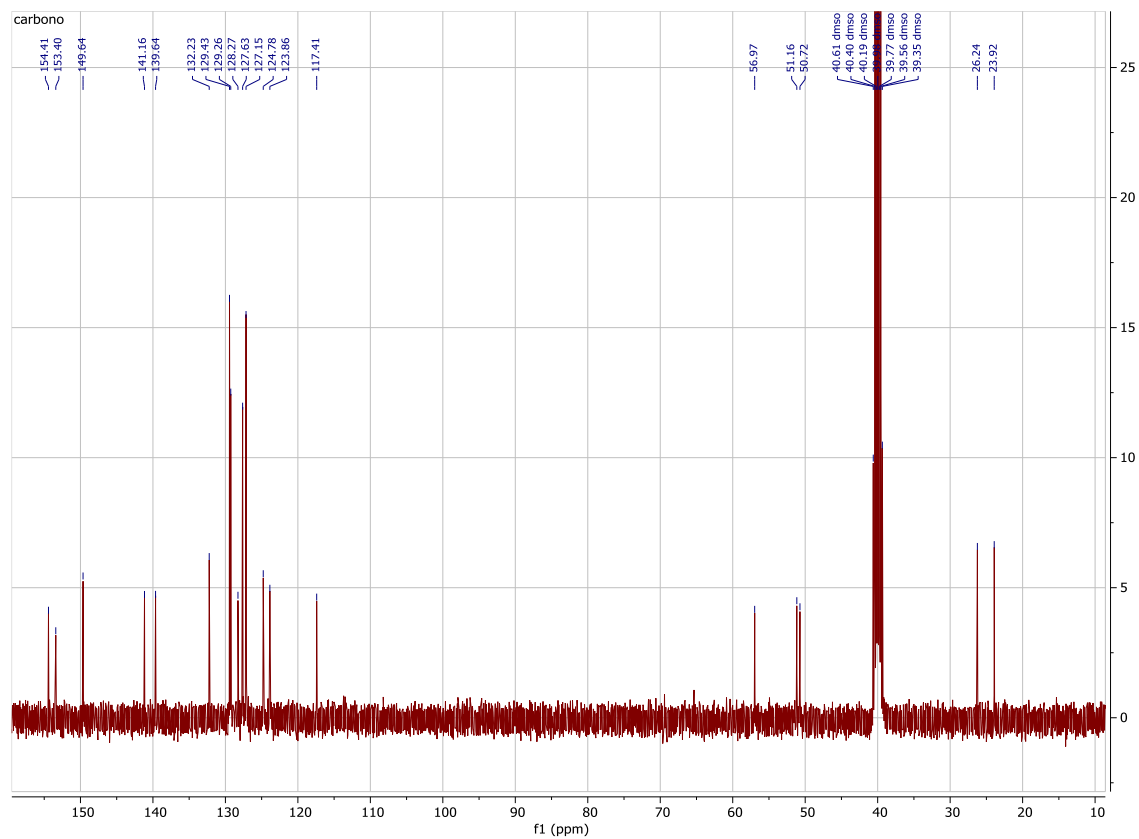

Fig-9

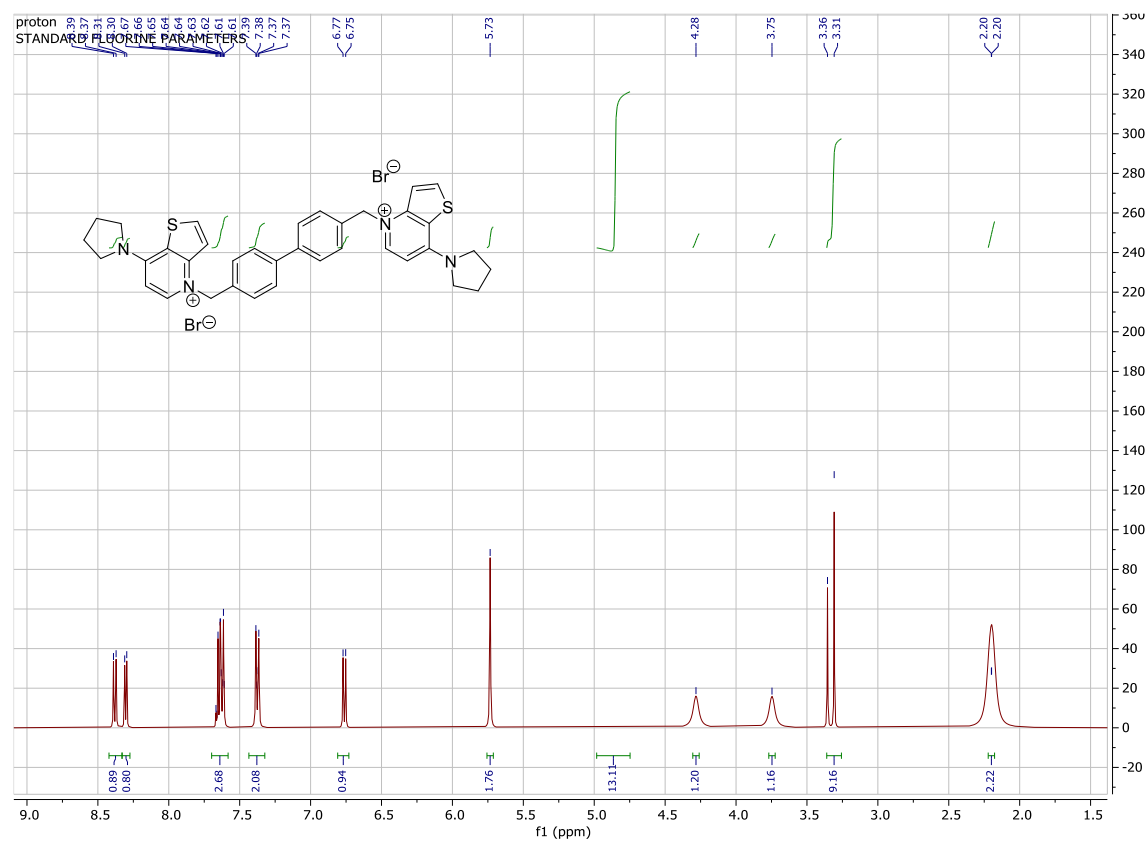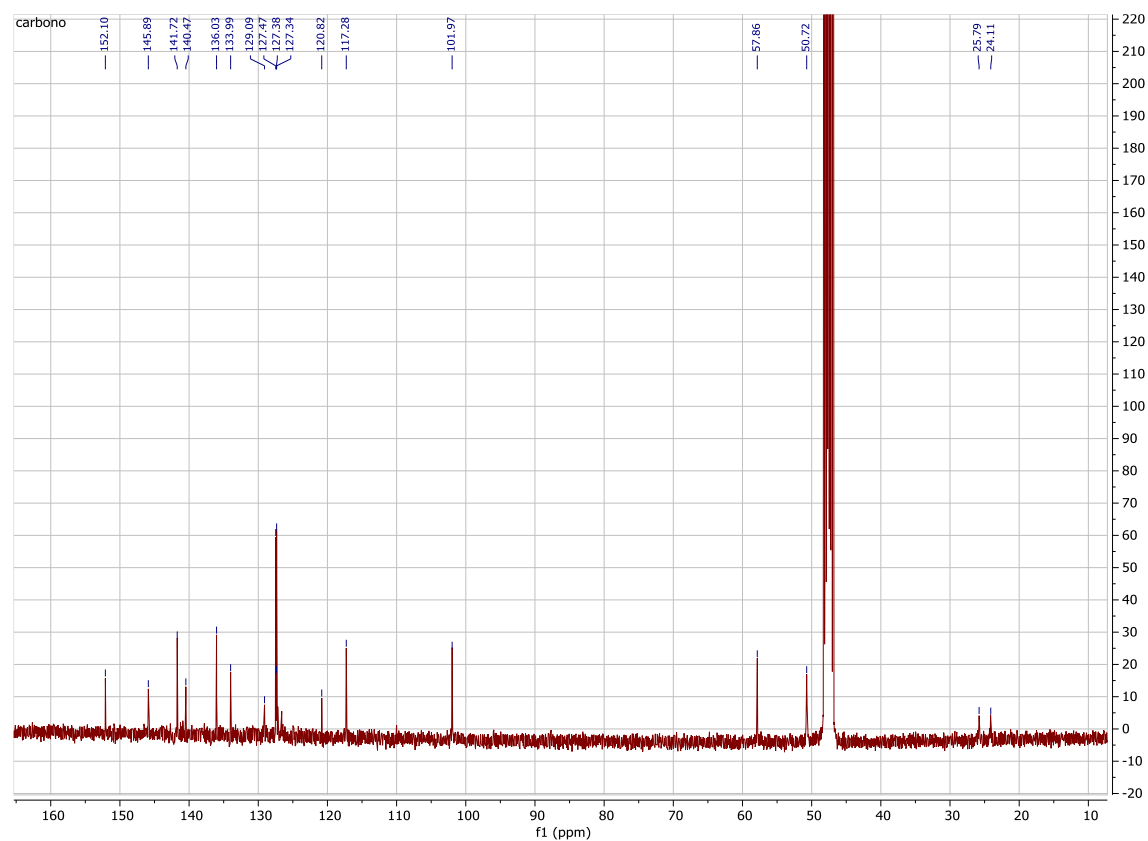

# Fa-21

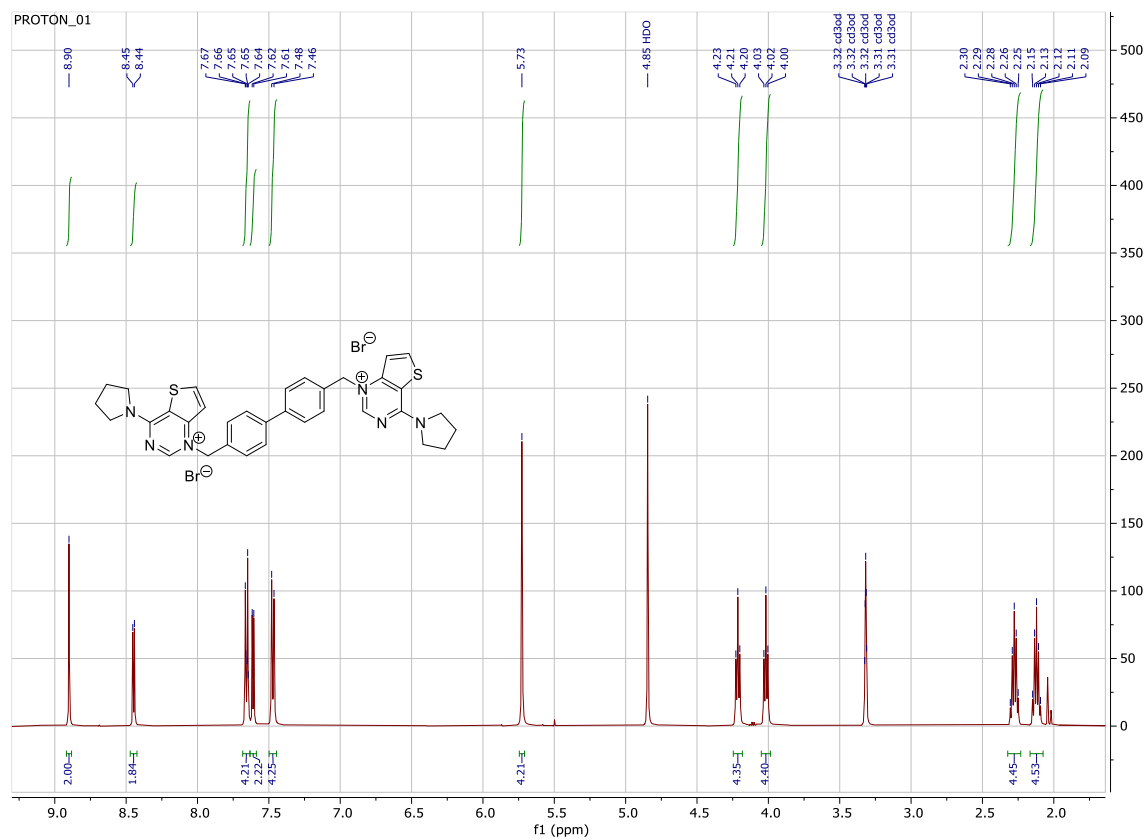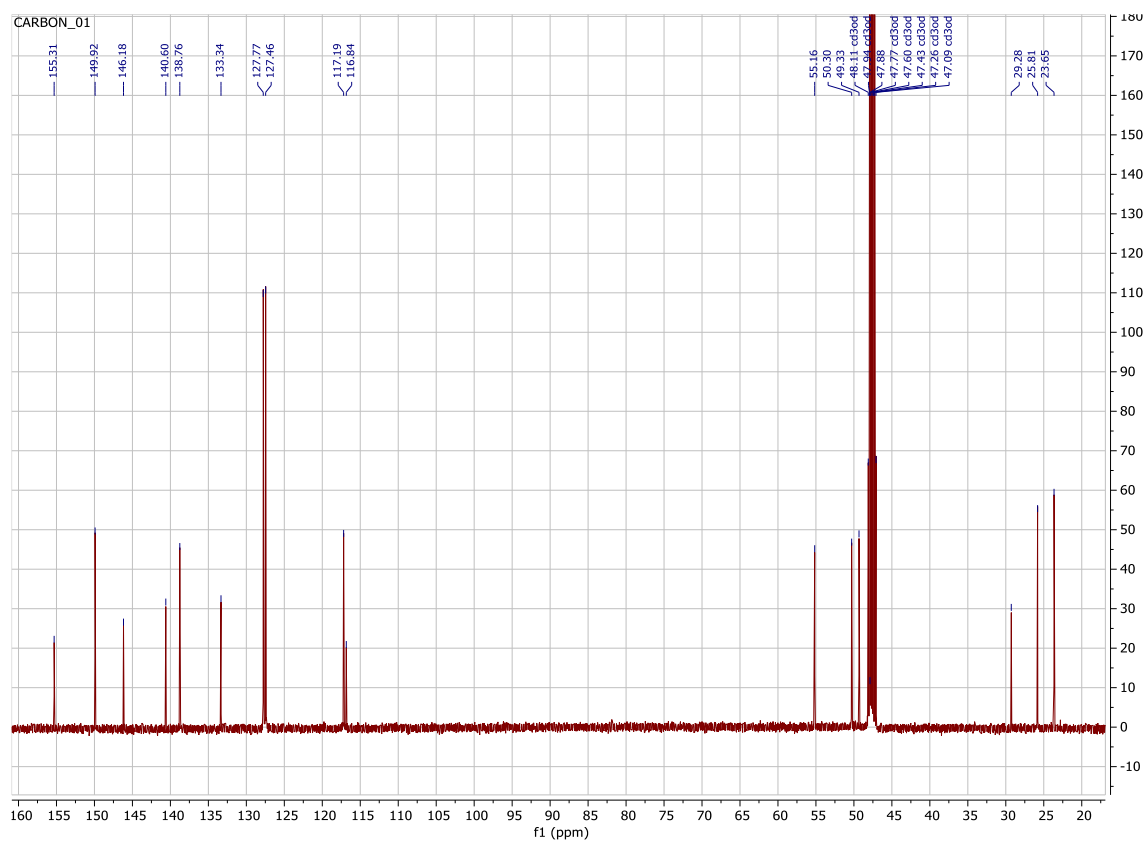

Fg-14

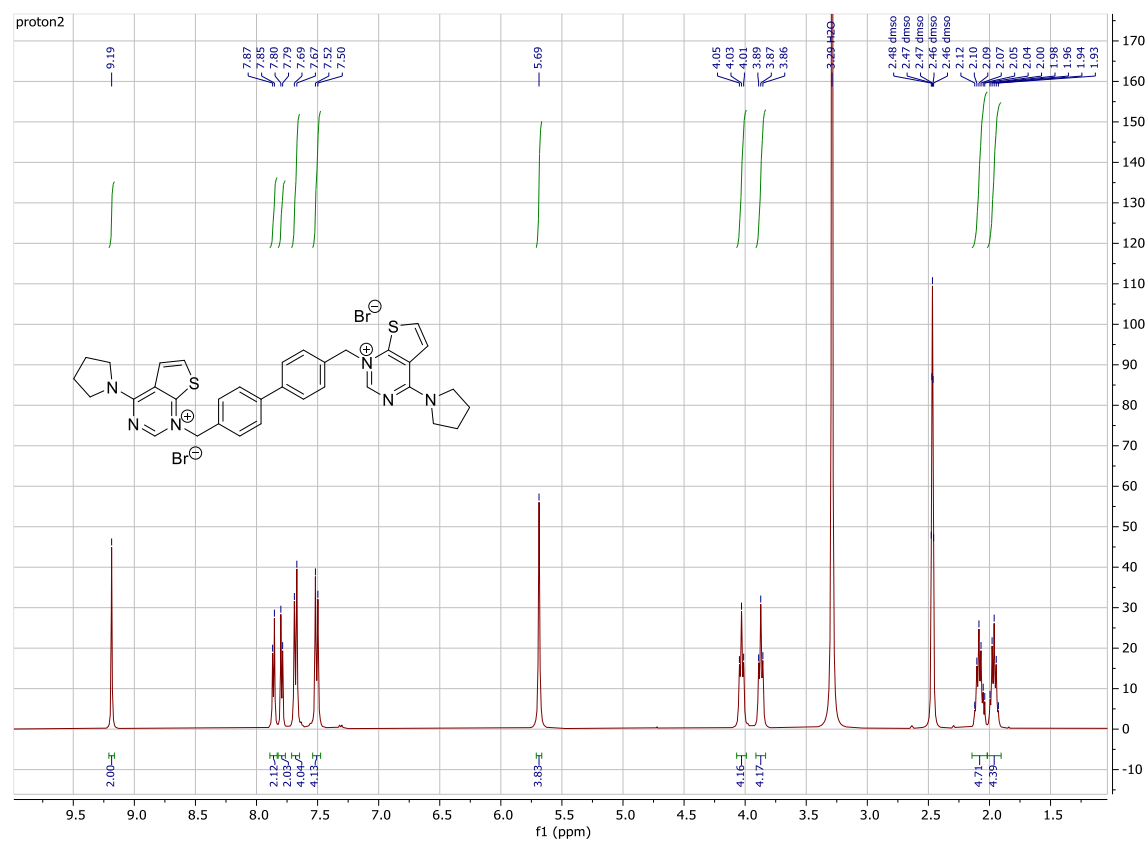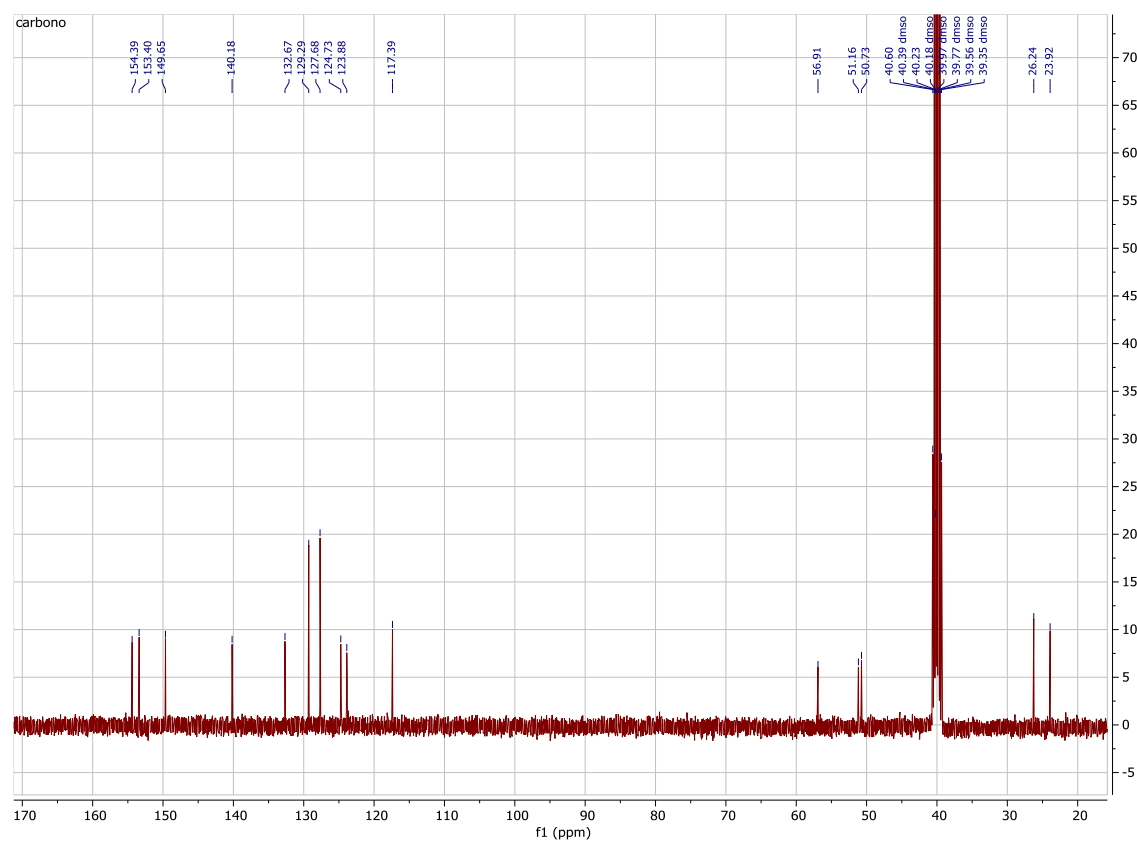

# Fa-24

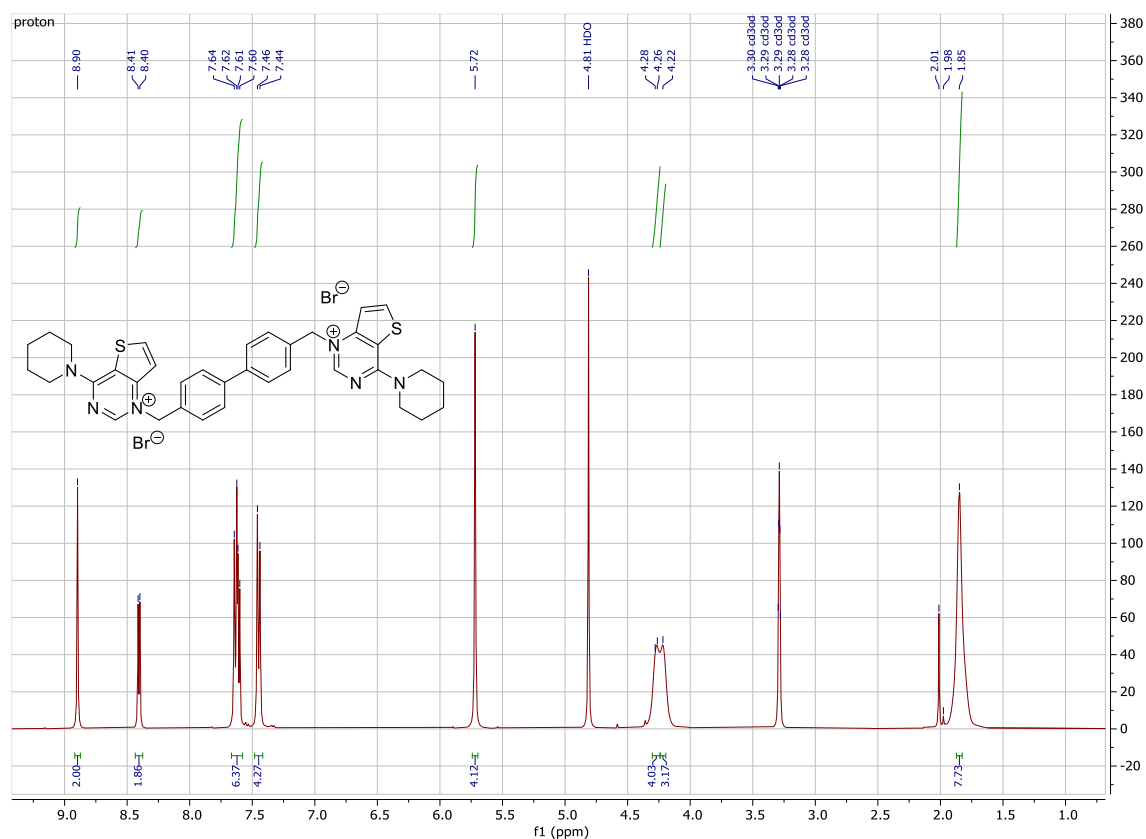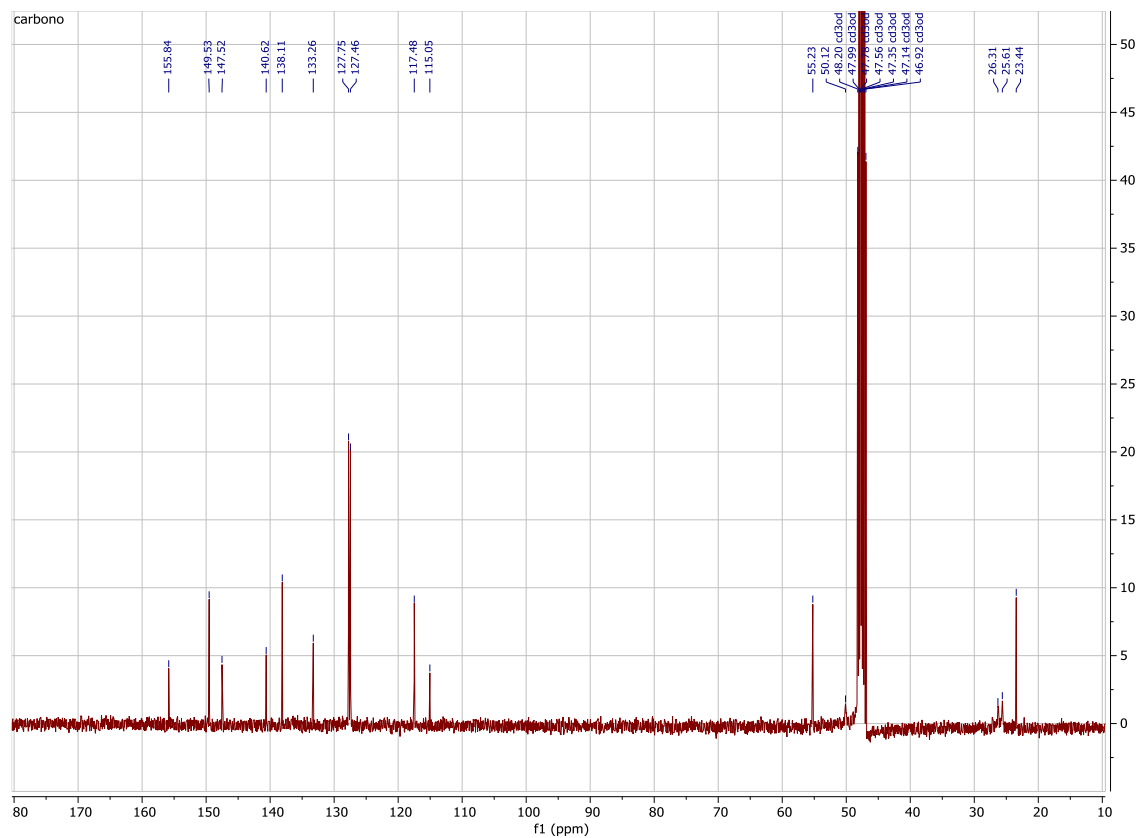

Fig-30

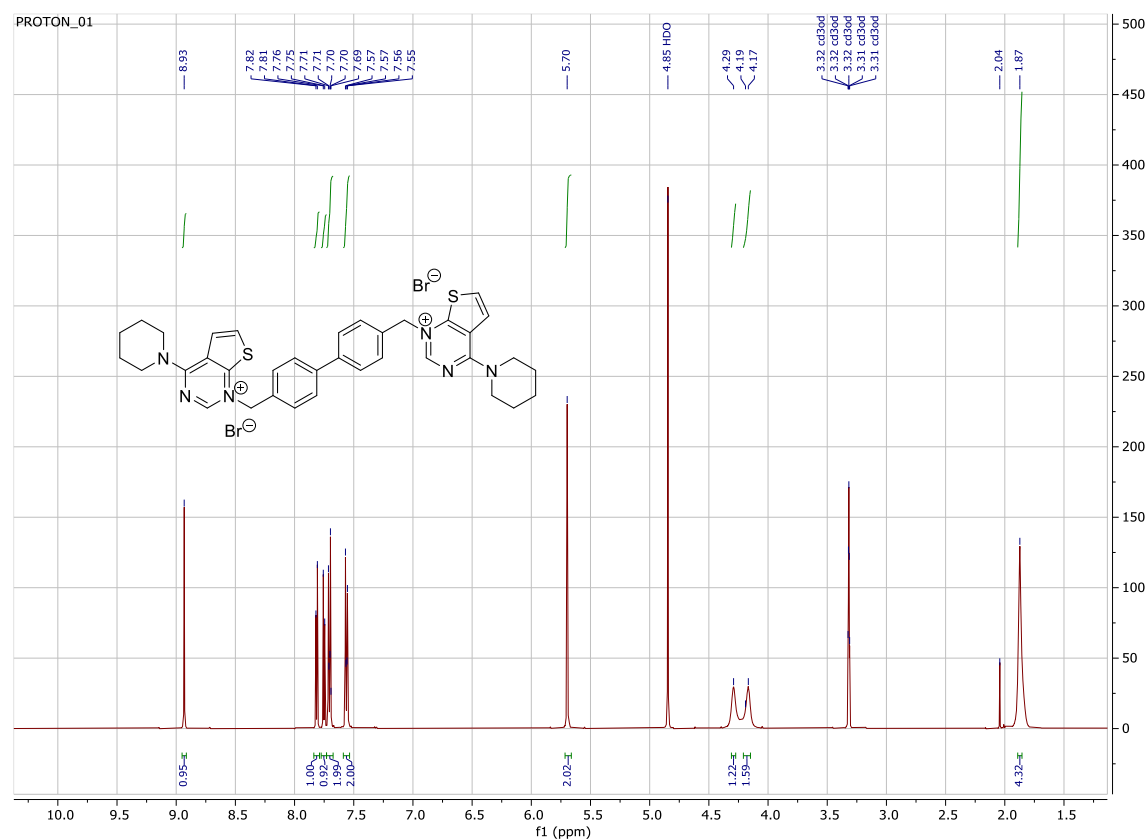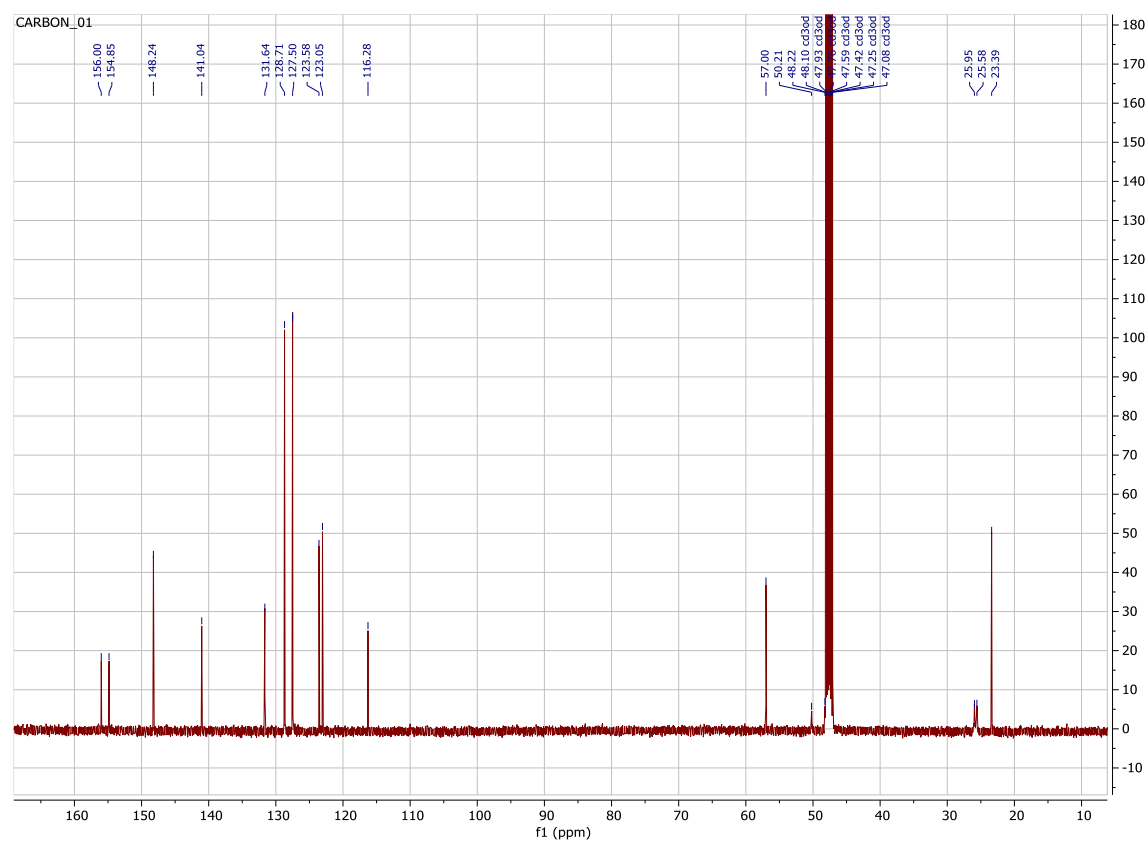



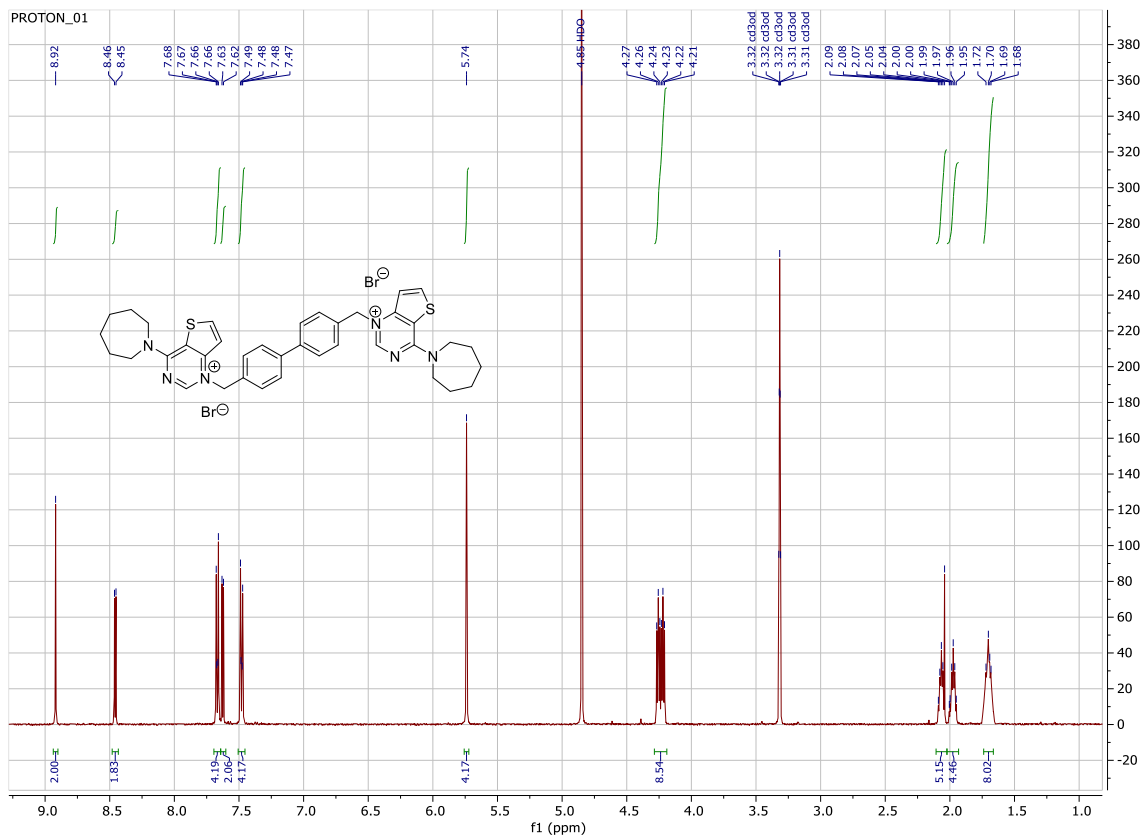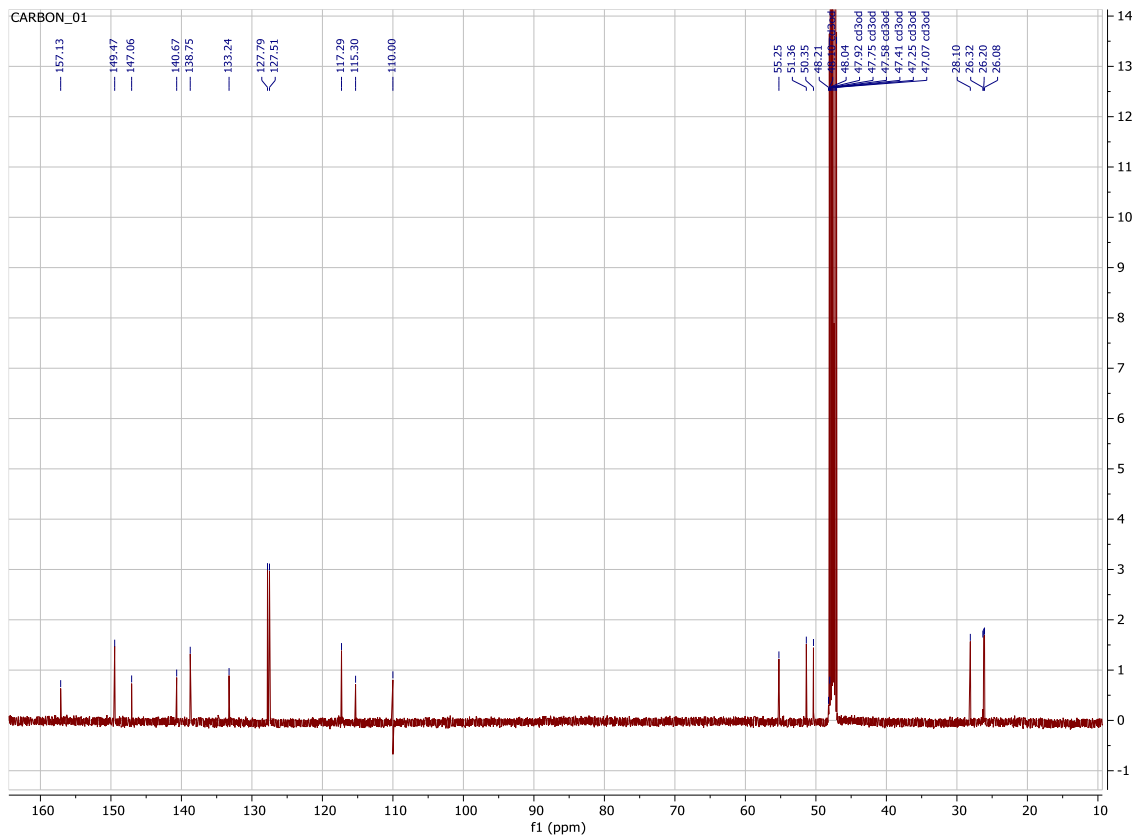

Fg-18

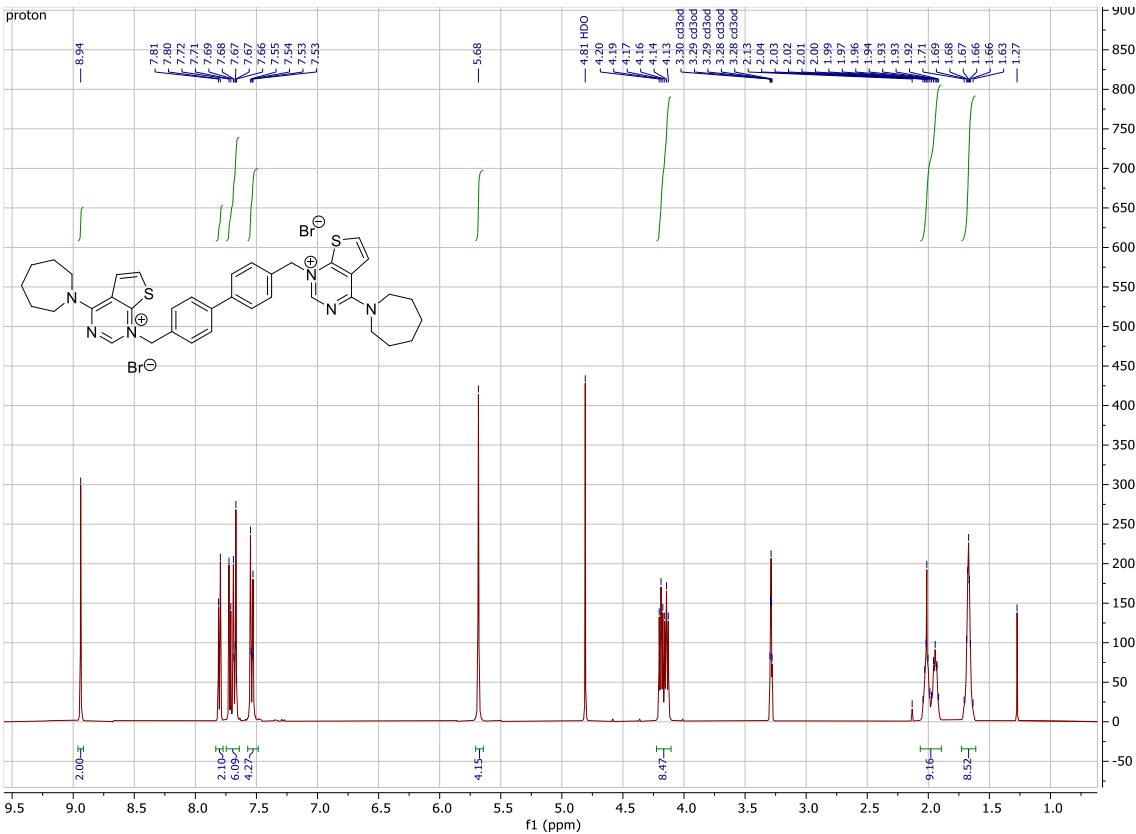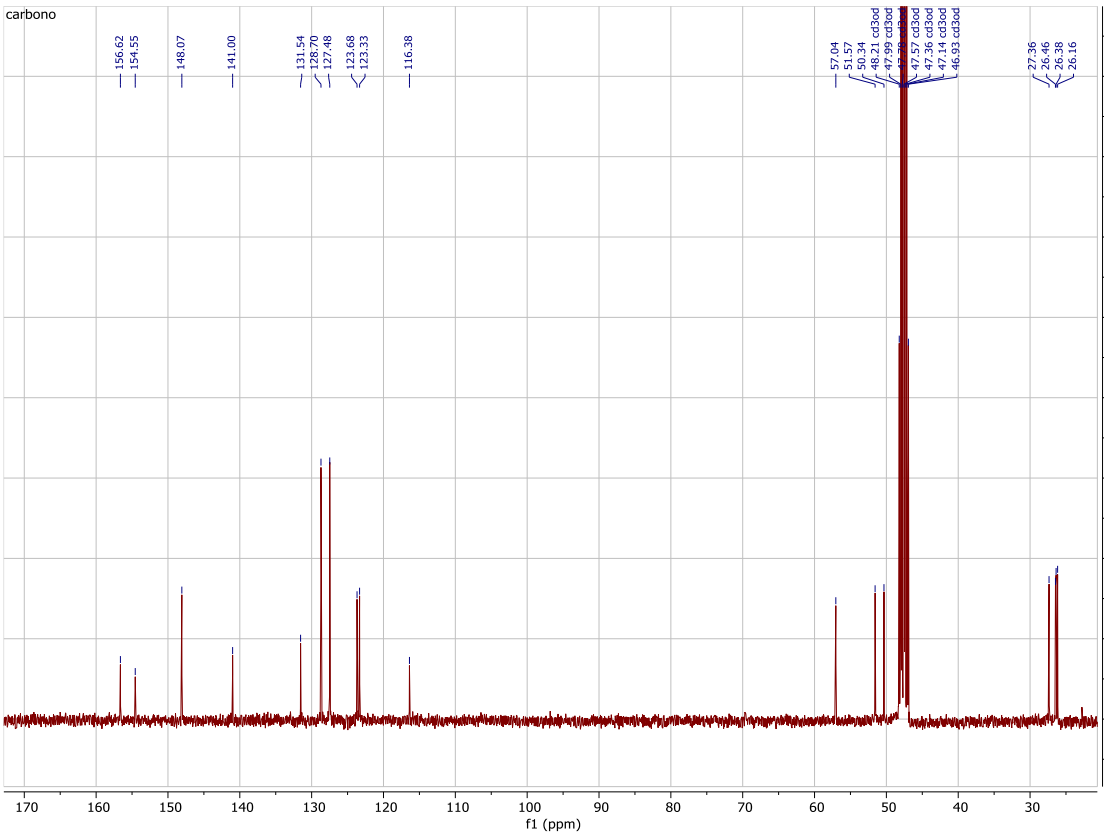

# Fp-1

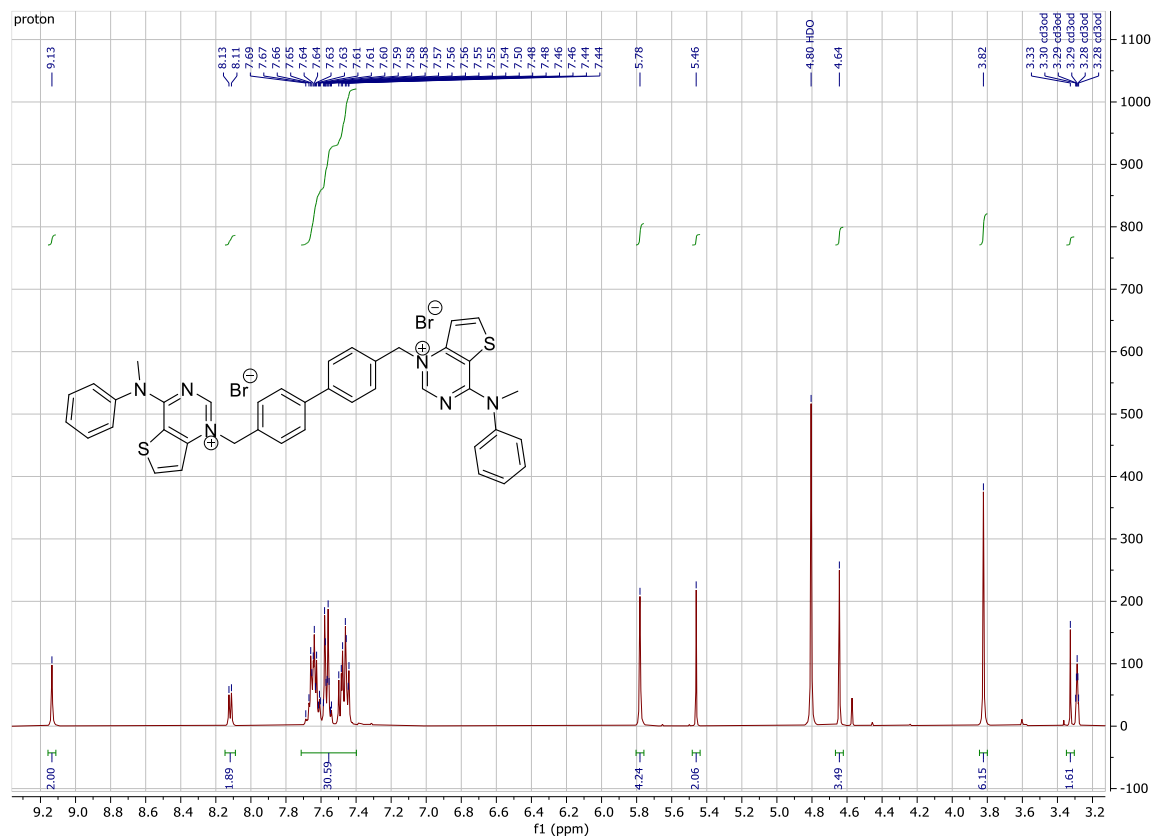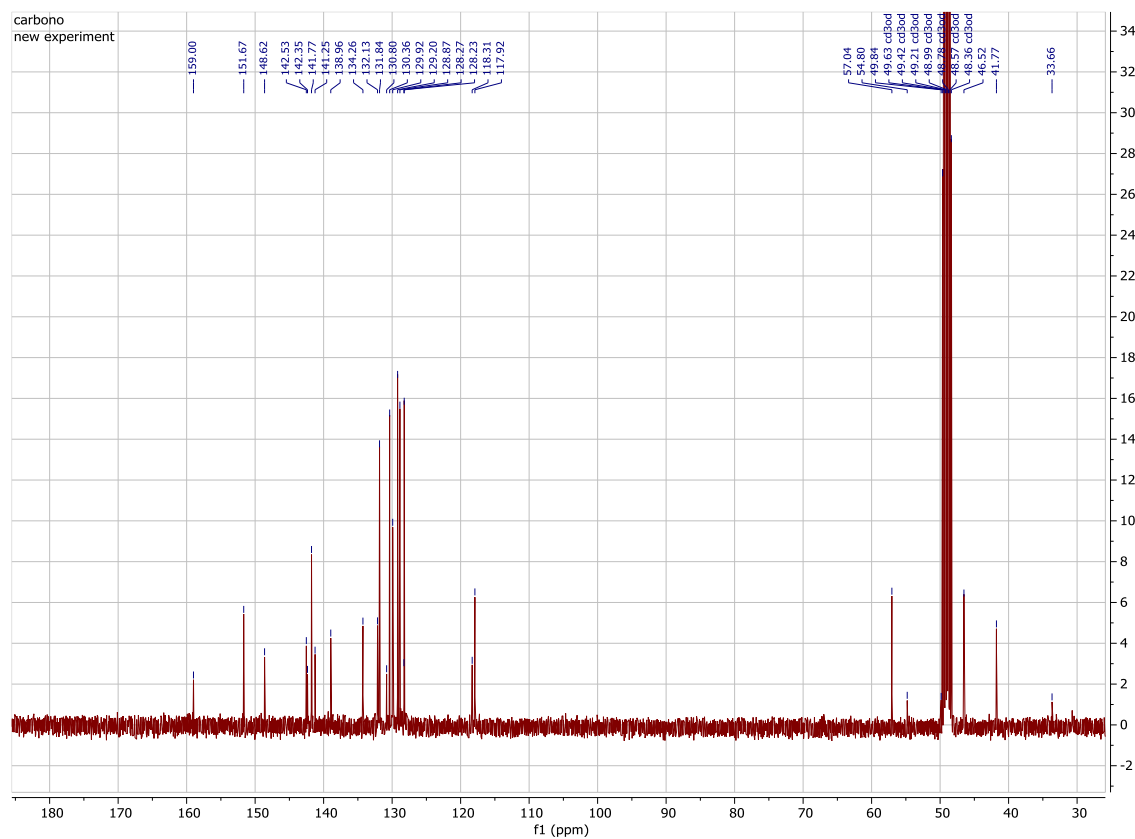

Fp-8

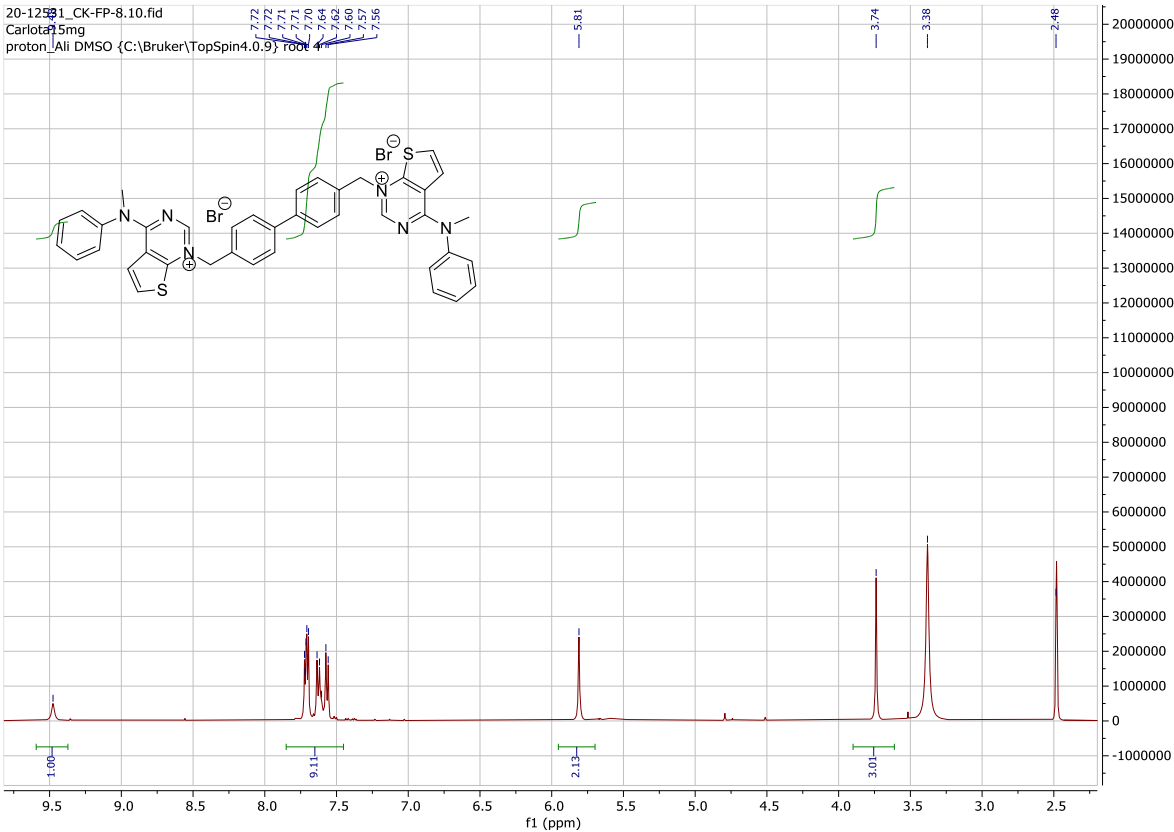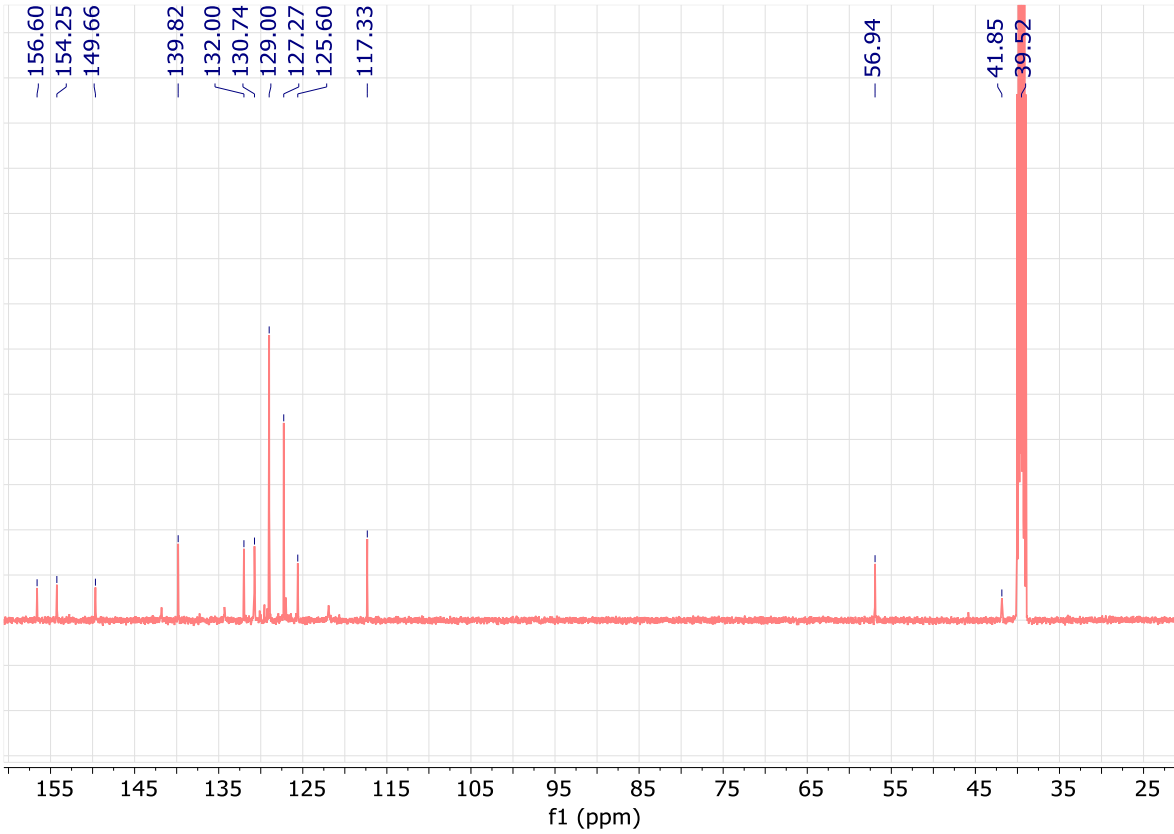

Fig-12

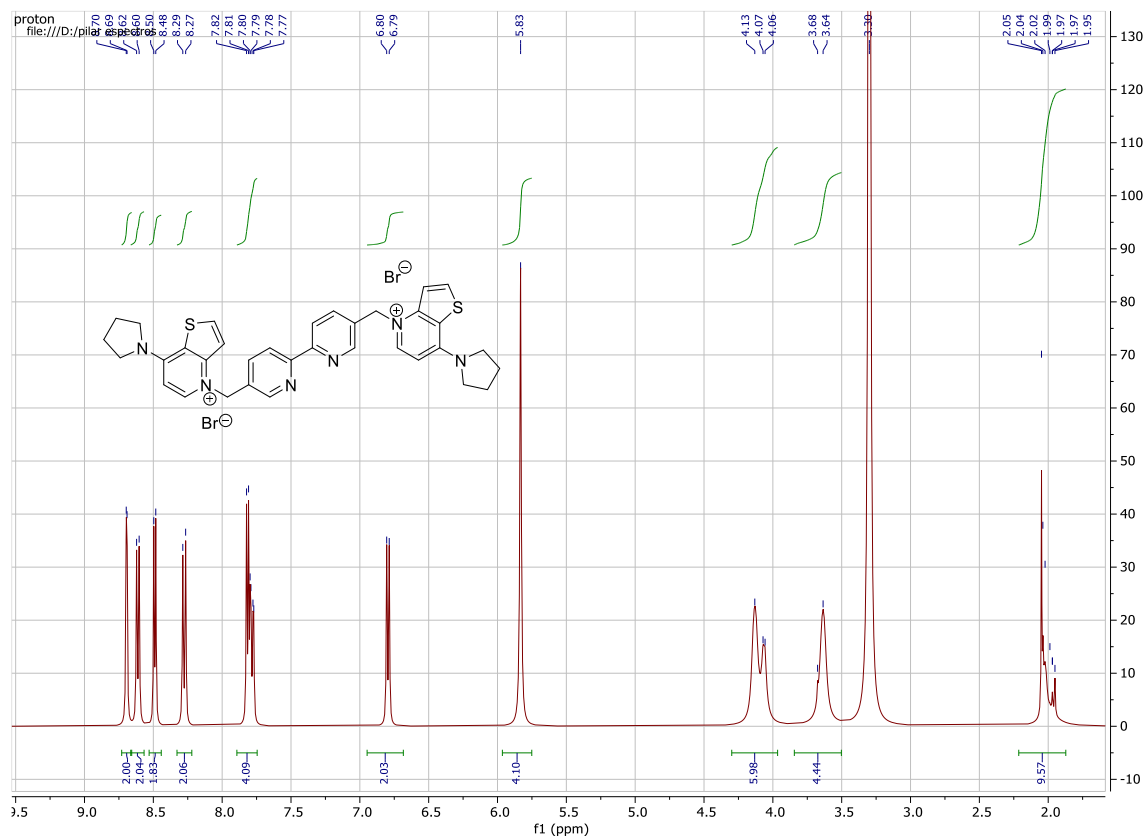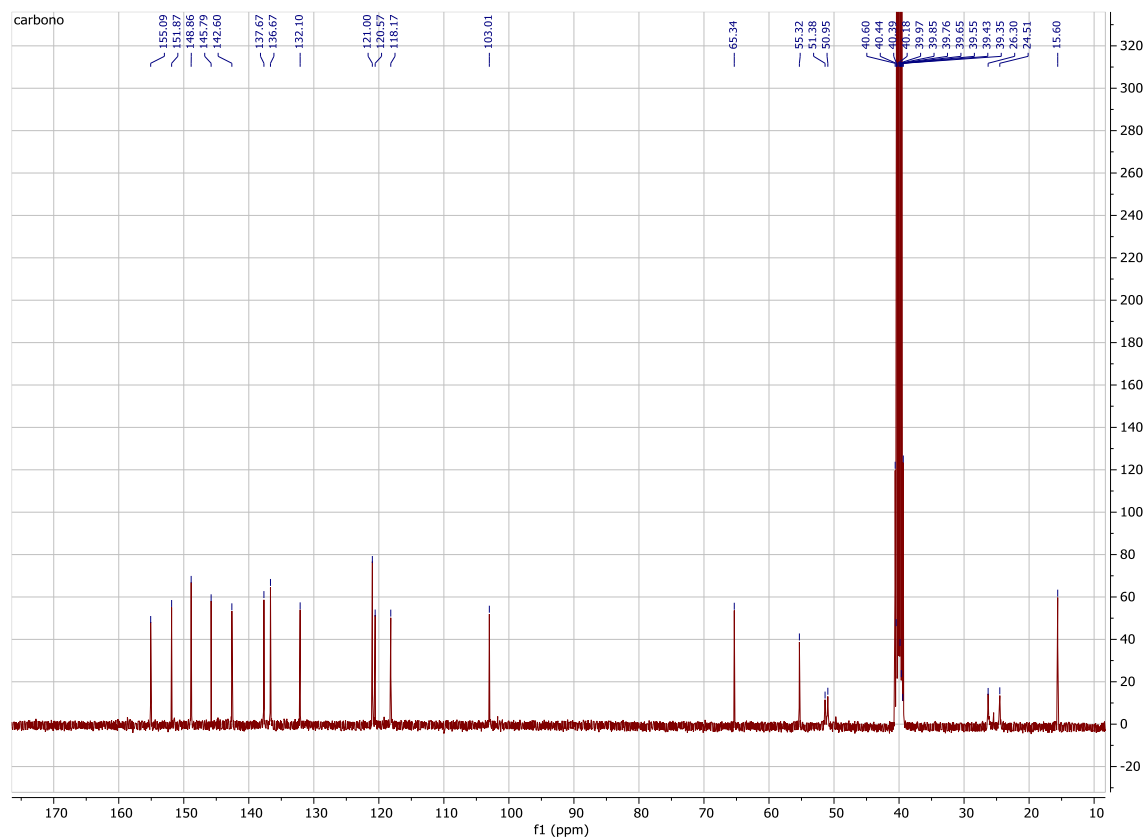

Fig-17

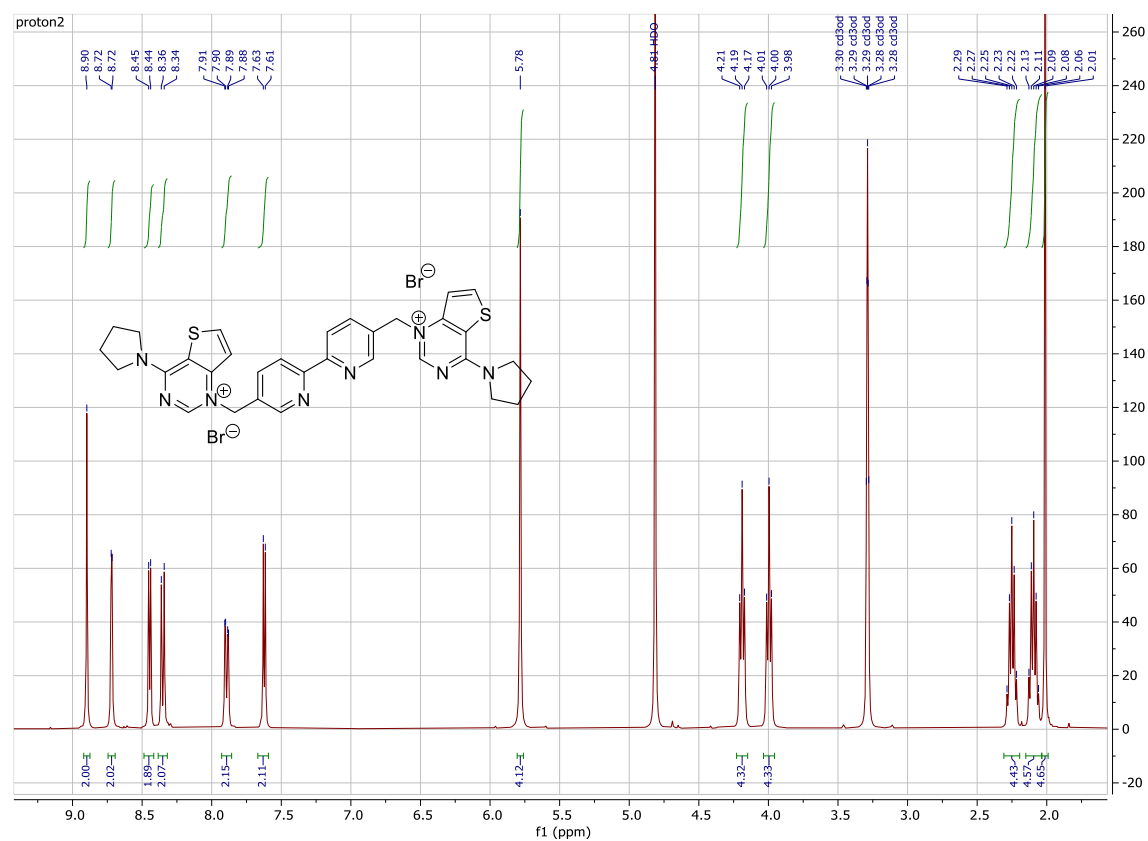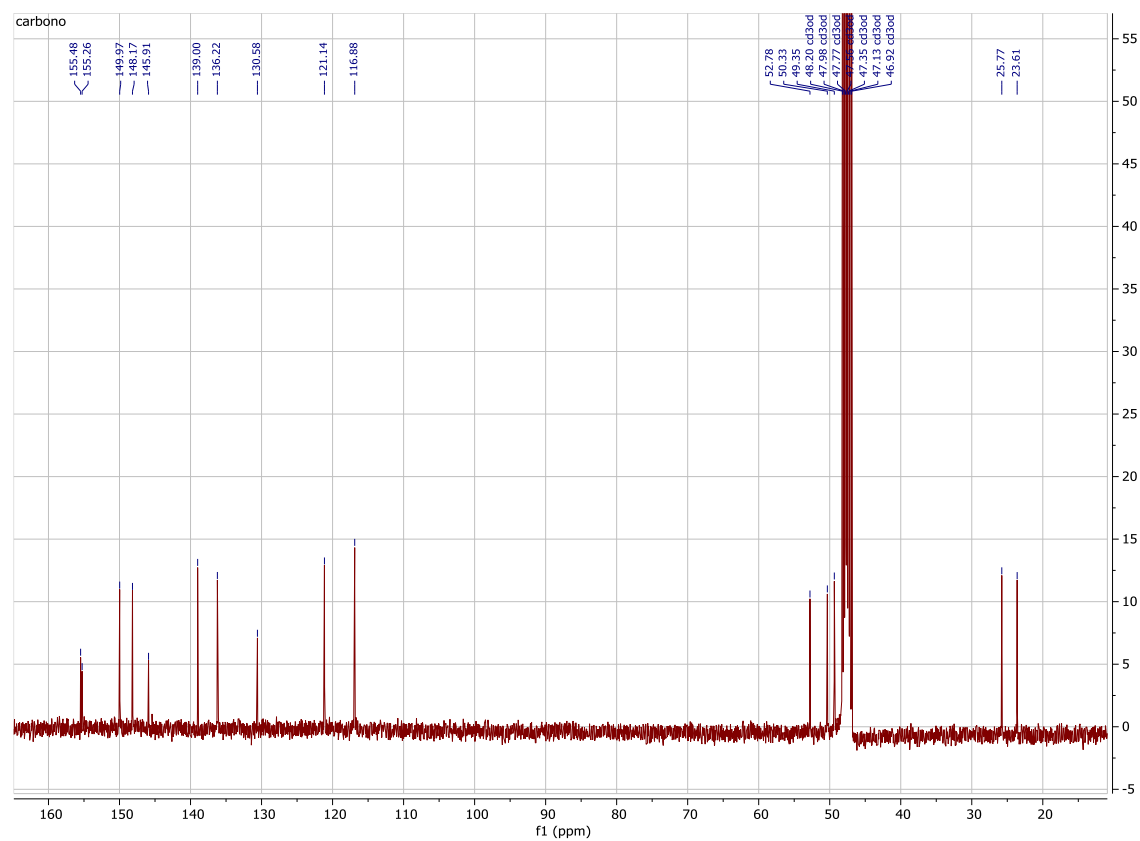

Fg-13

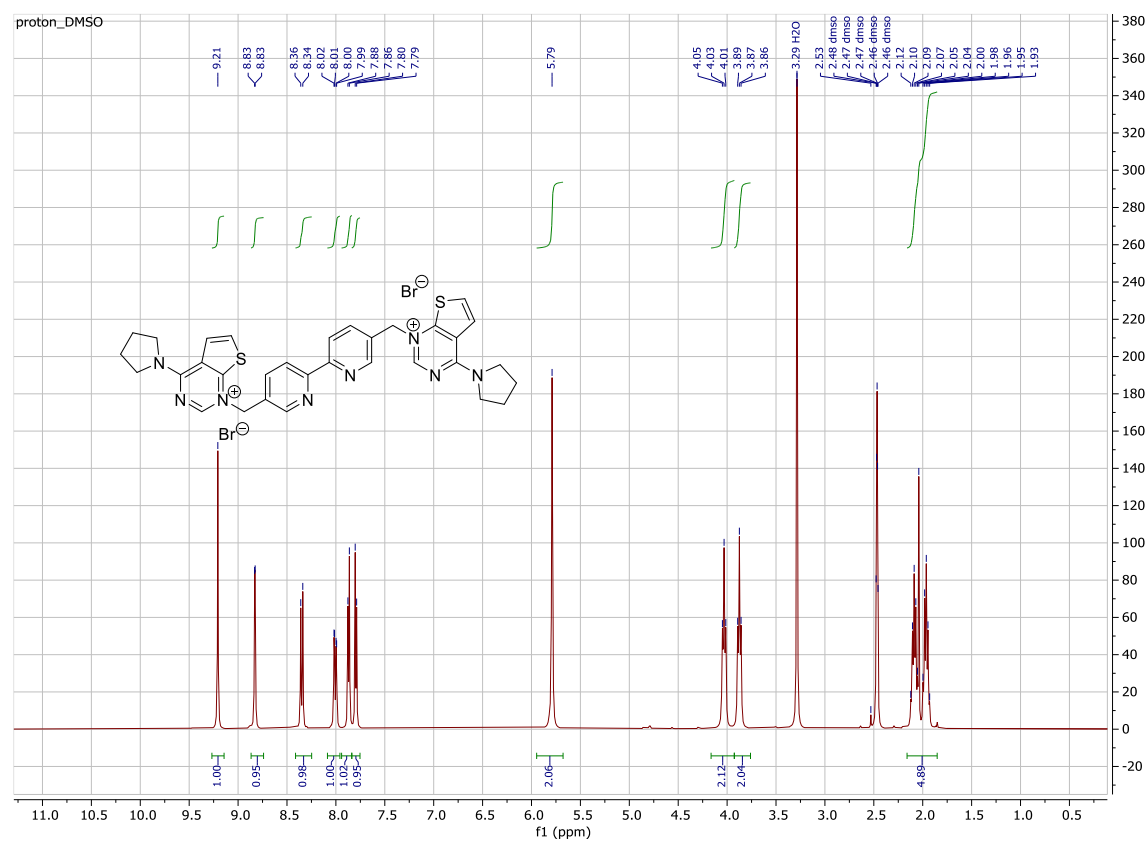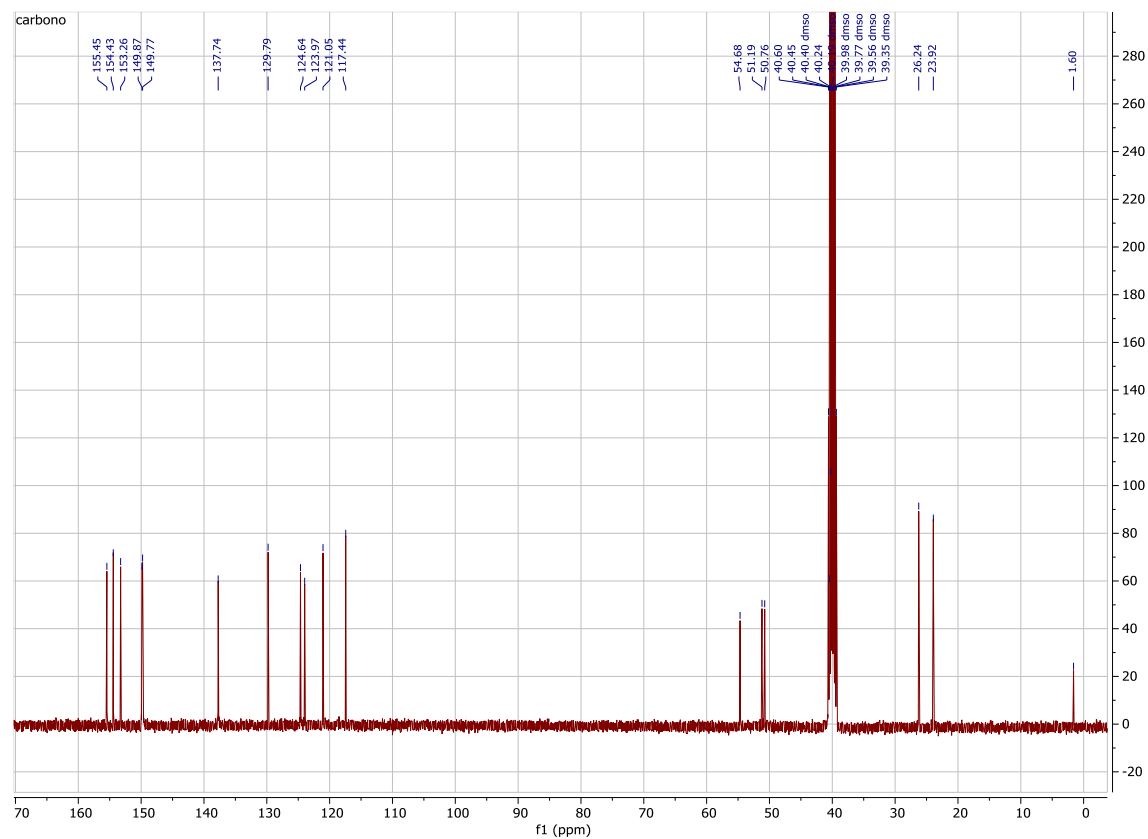

# Fa-27

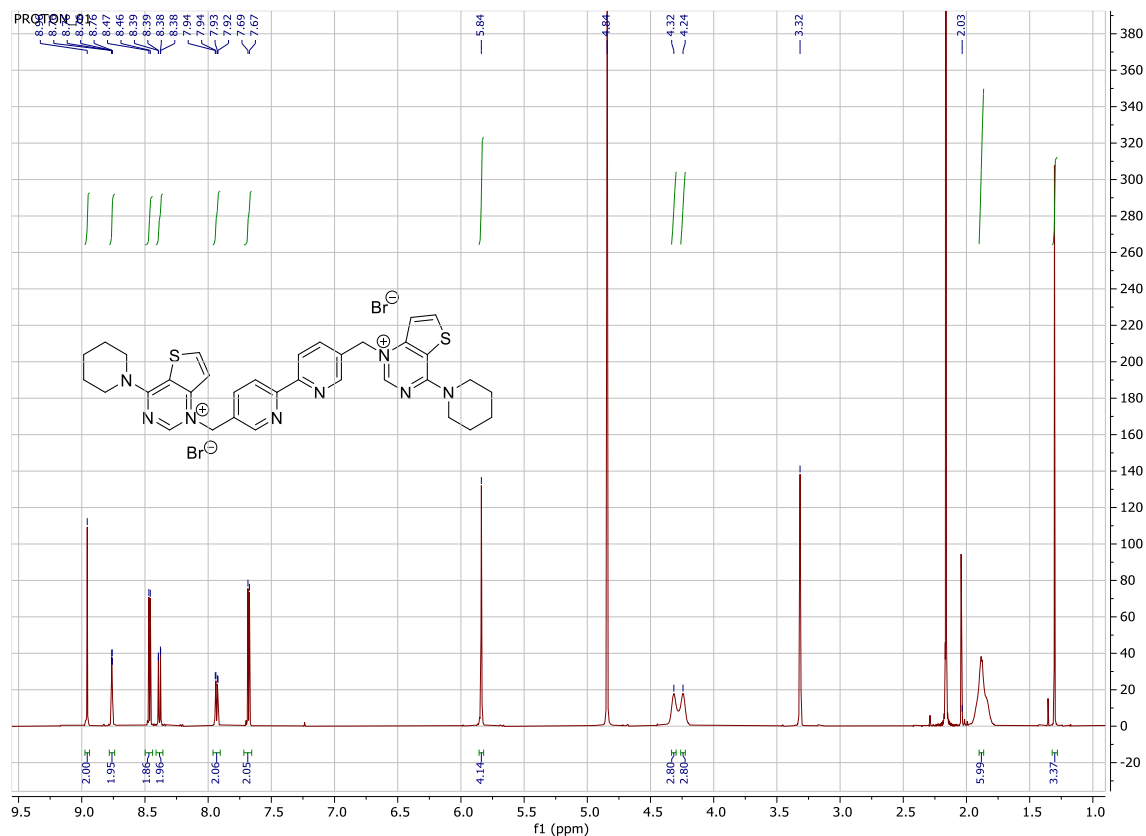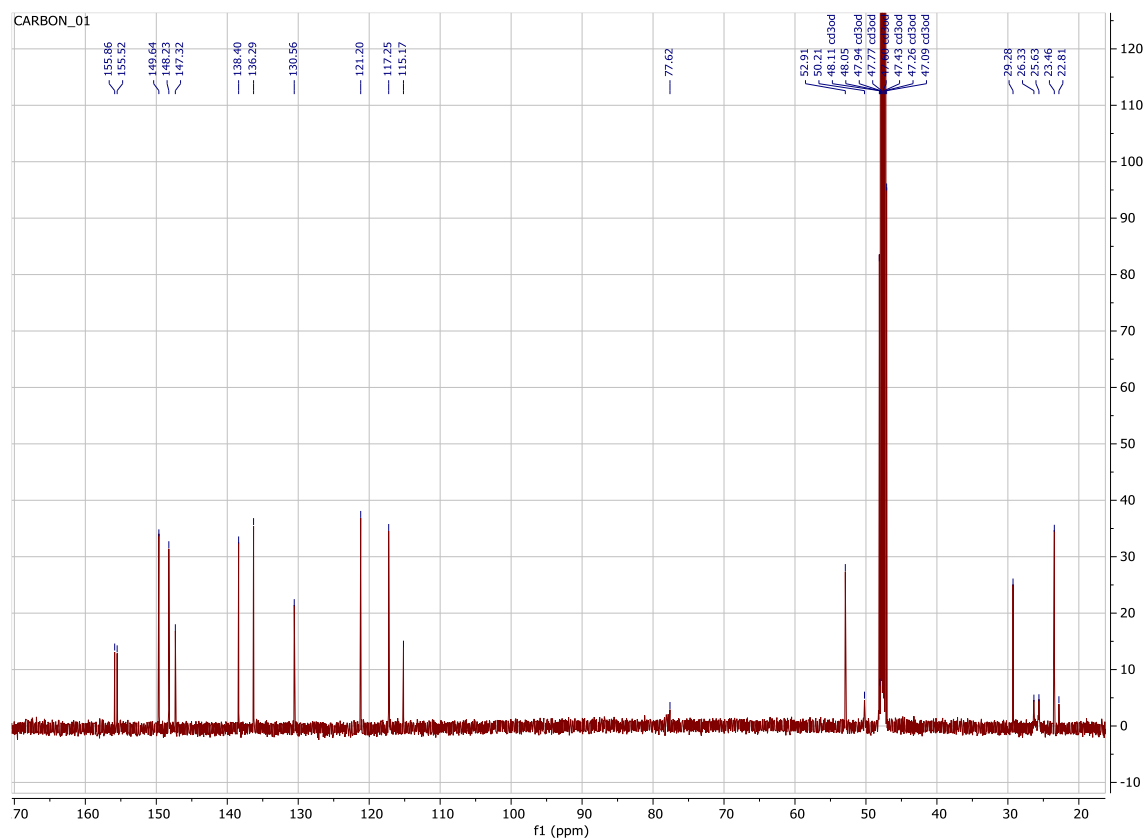



Fig-32

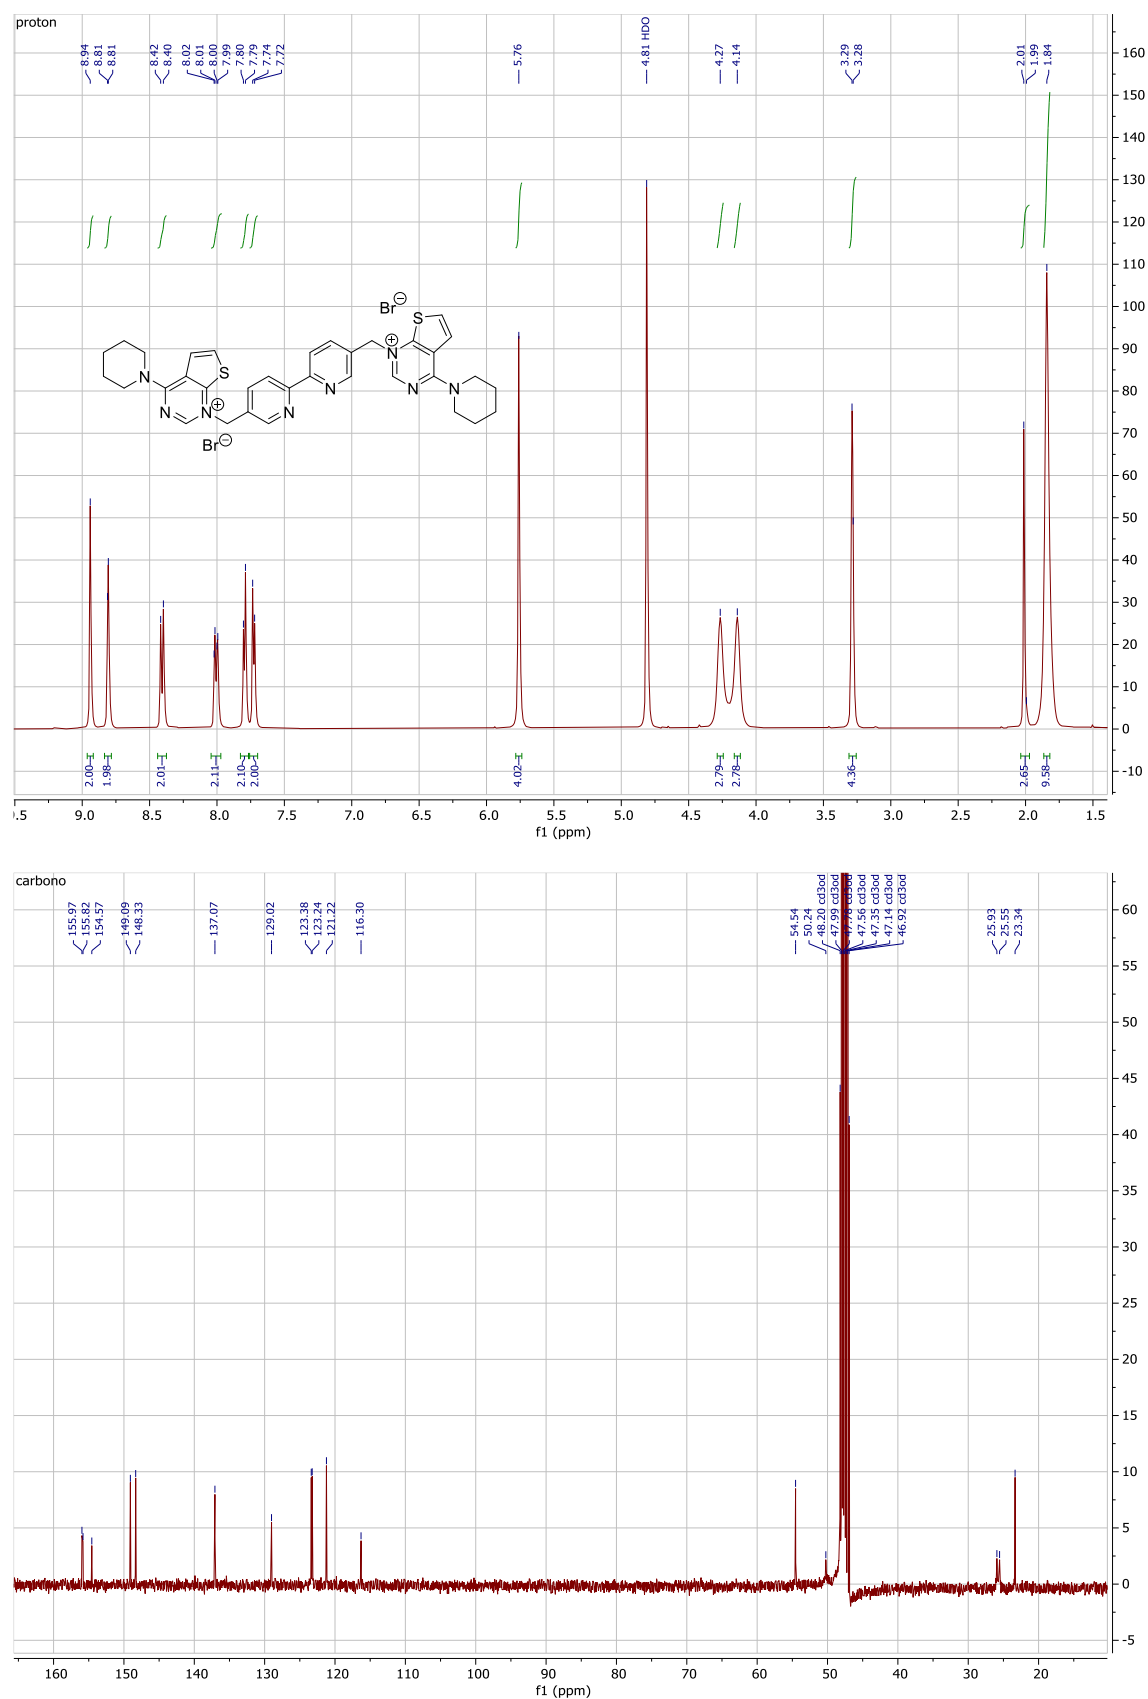

## Fa-26

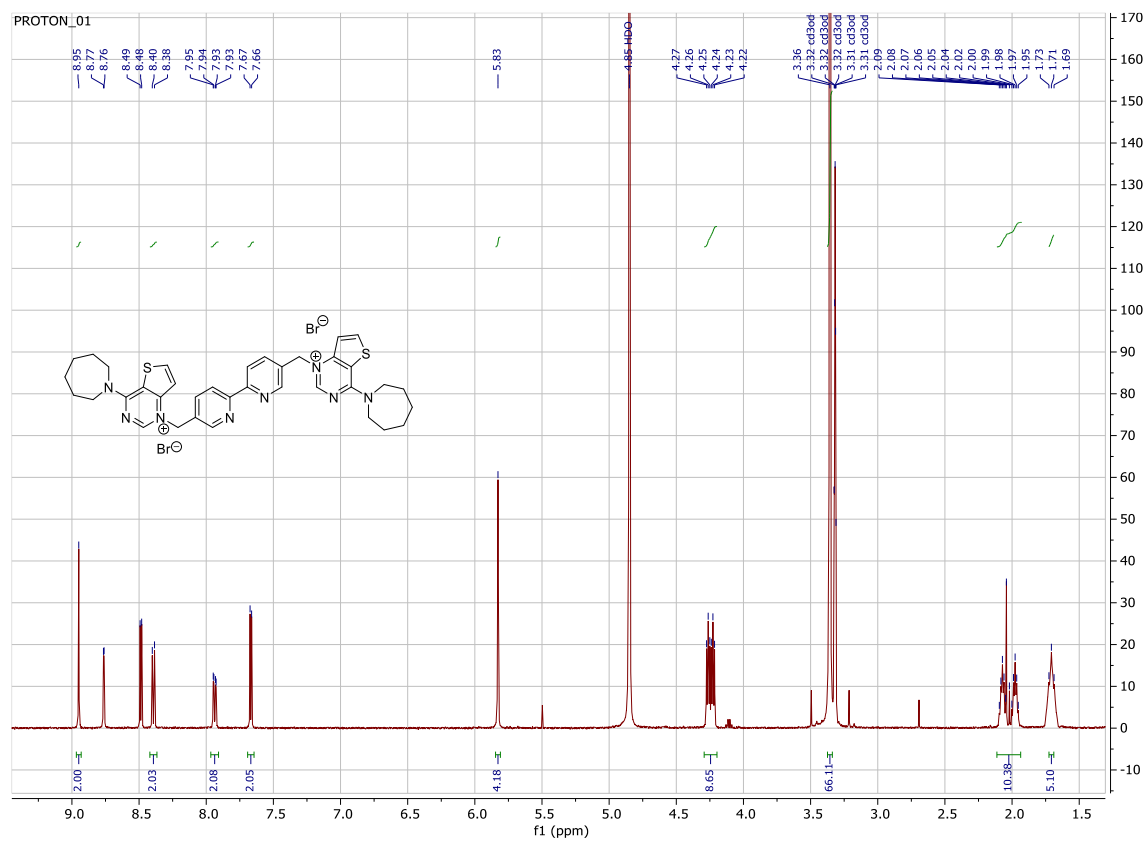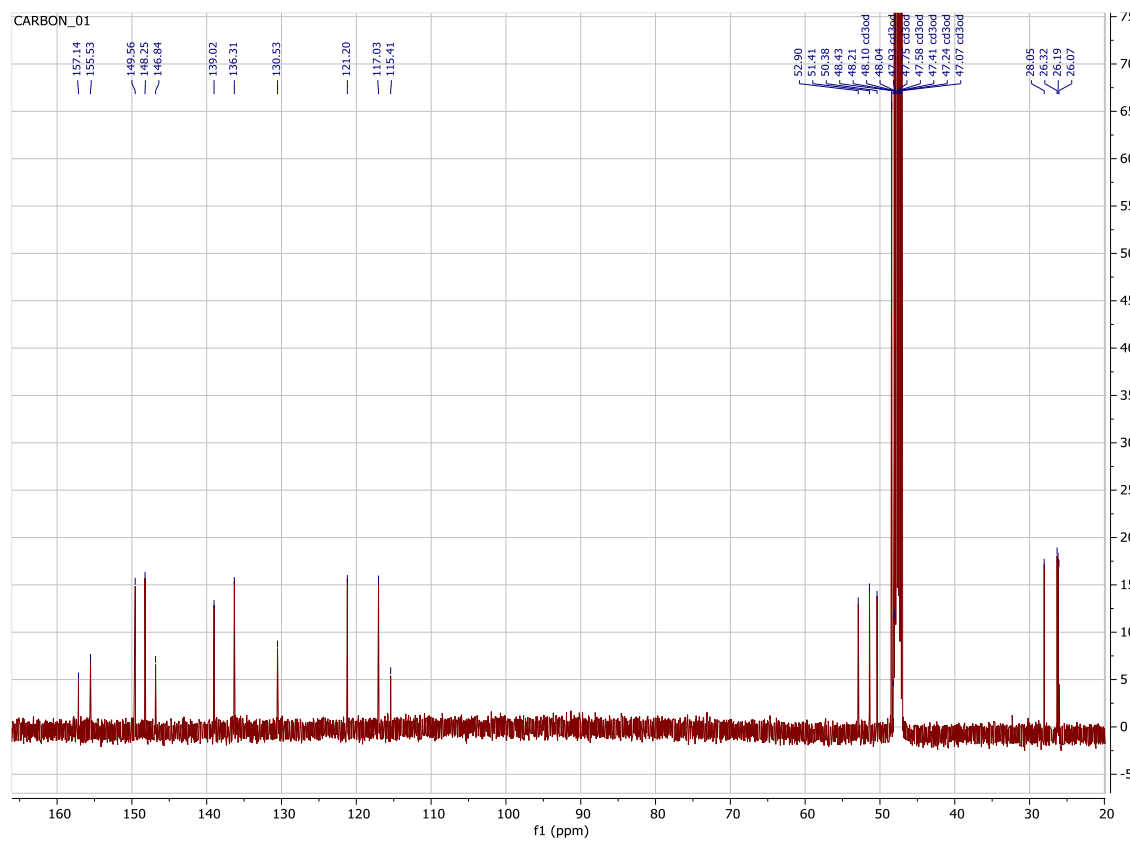

Fig-20

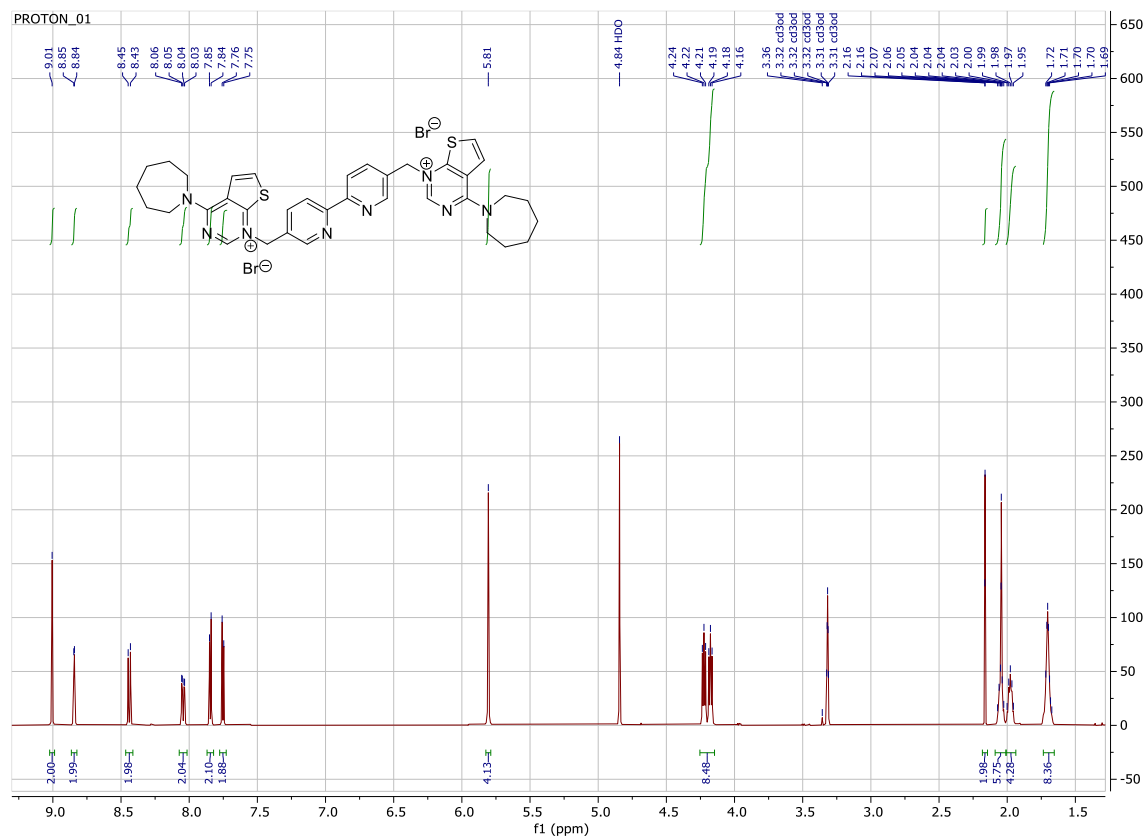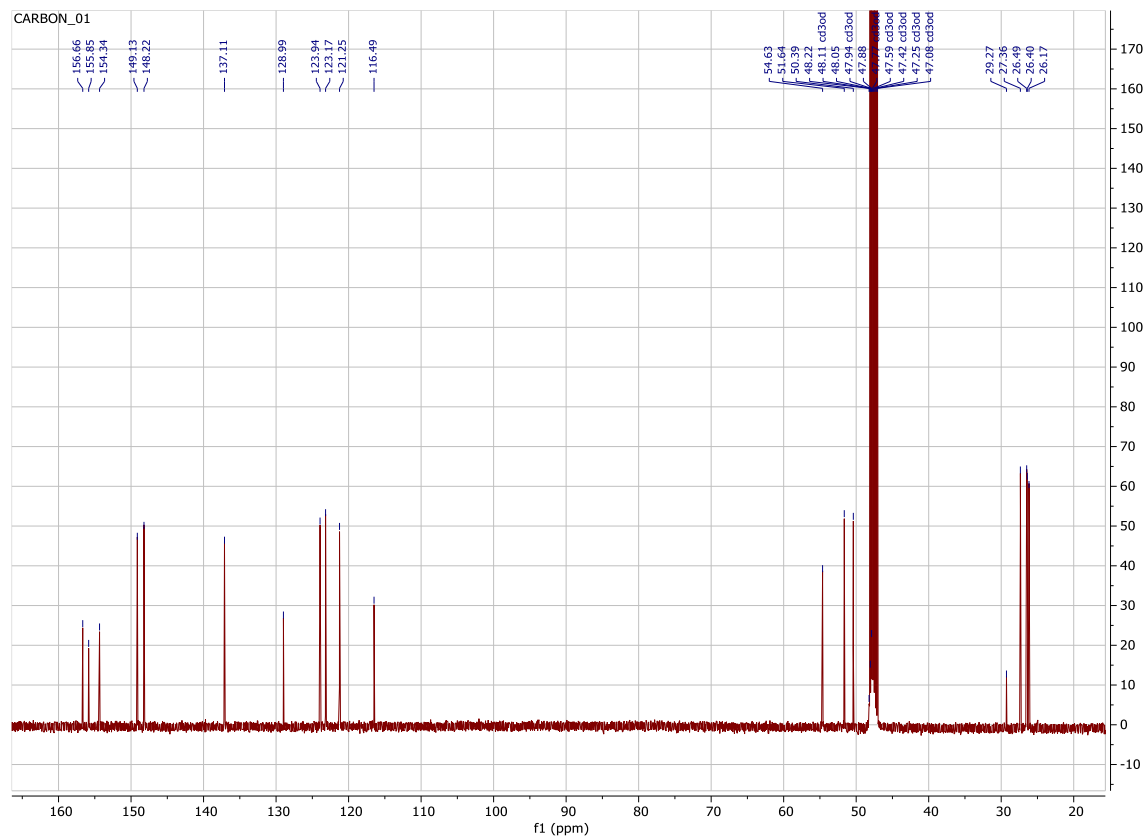

Fig-11

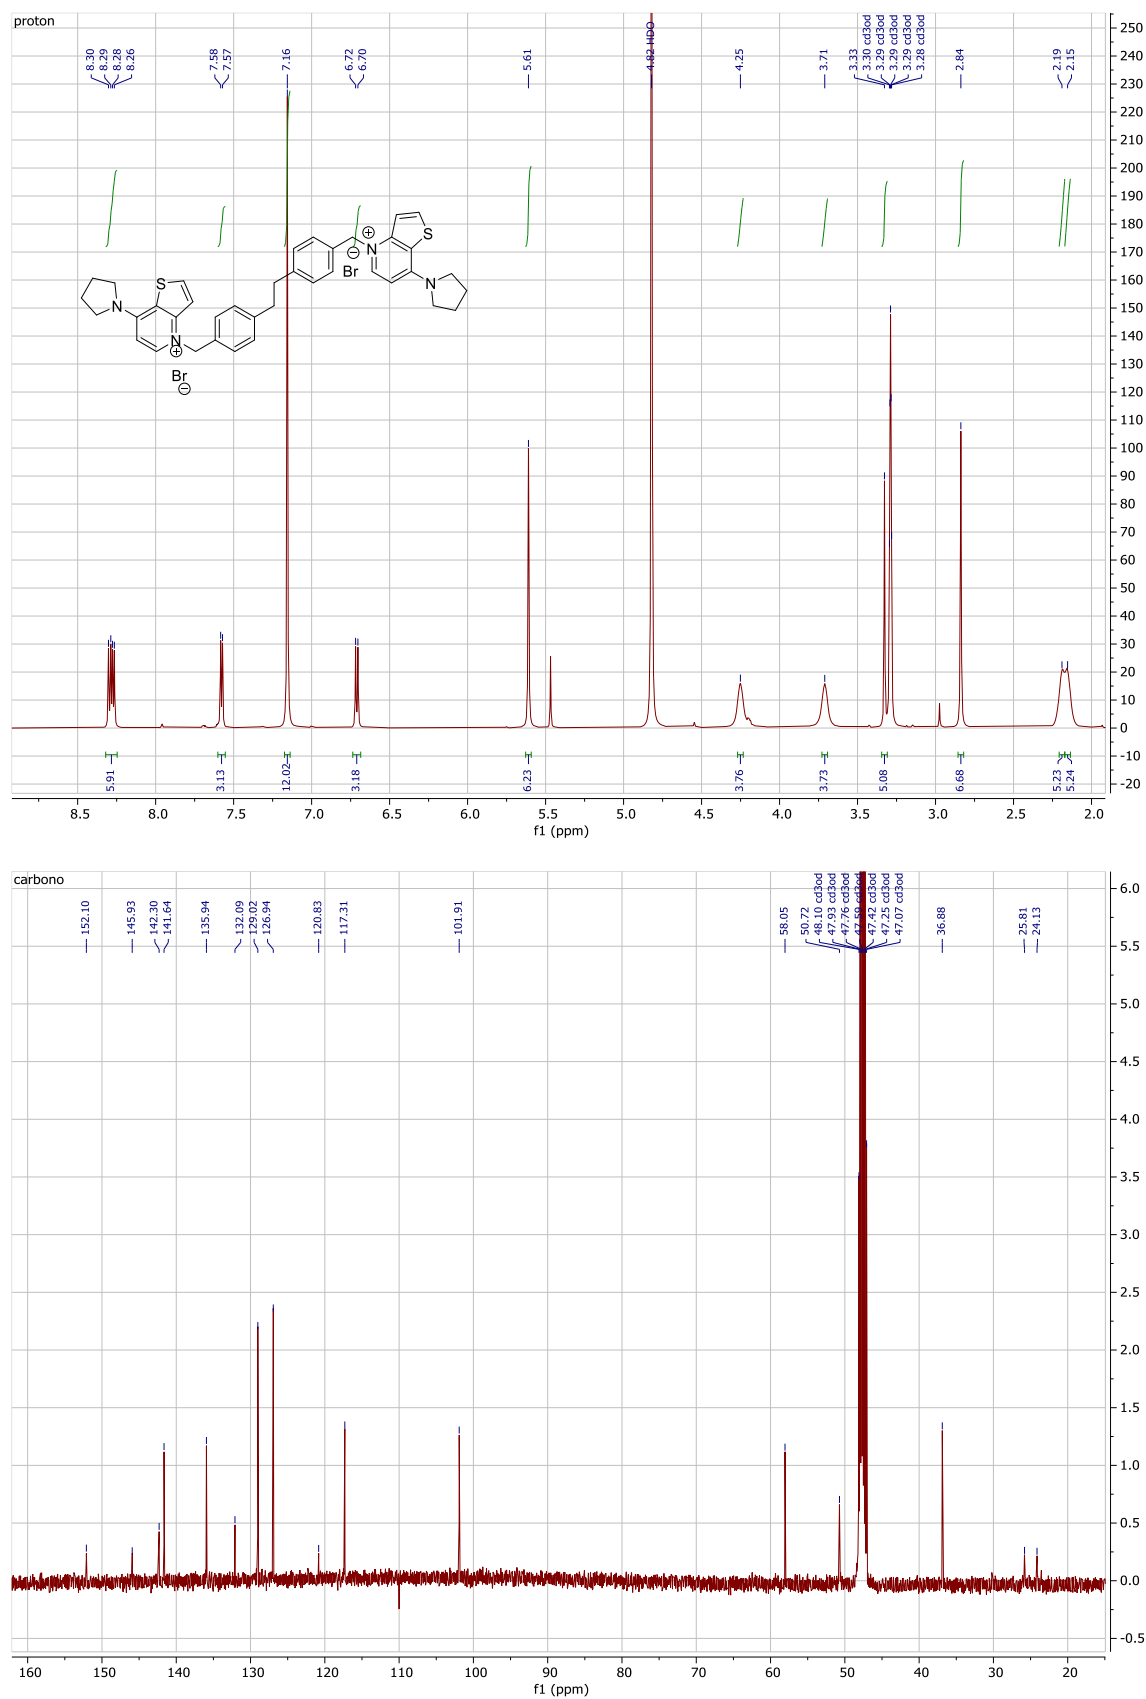

**Chemical structure of compound 10:**

C1CCN1c2nc3cc(Cc4ccc(Cc5ccc(cc5)C6=NC7C(=N6)N(CCN7)S8C=CC=C8)cc4)cc3s2.[Br-]

**<sup>1</sup>H NMR (400 MHz, CDCl<sub>3</sub>) data:**

| Chemical Shift (ppm)                                             | Integration      |
|------------------------------------------------------------------|------------------|
| 8.81                                                             | 2.00             |
| 8.43, 8.41                                                       | 2.01             |
| 7.55, 7.53, 7.25, 7.24, 7.23, 7.19, 7.17, 7.16                   | 2.03, 4.10, 4.08 |
| 5.60                                                             | 4.02             |
| 4.81 (H <sub>2</sub> O)                                          |                  |
| 4.20, 4.18, 4.16, 3.99, 3.98, 3.96                               | 4.20, 4.23       |
| 3.30, 3.29, 3.28, 3.28, 3.28, 3.28 (CDCl <sub>3</sub> )          |                  |
| 2.85                                                             | 4.07             |
| 2.28, 2.24, 2.24, 2.23, 2.21, 2.12, 2.10, 2.07, 2.05, 2.01, 2.01 | 4.27, 8.17       |

**<sup>13</sup>C NMR (100 MHz, CDCl<sub>3</sub>) data:**

| Chemical Shift (ppm)                                                        |
|-----------------------------------------------------------------------------|
| 155.27                                                                      |
| 149.77, 146.17, 142.44, 138.64                                              |
| 131.33, 129.11, 127.17                                                      |
| 117.18, 116.78                                                              |
| 55.31, 50.24, 49.28, 48.94, 48.64, 47.78, 47.57, 47.36, 47.14, 46.93, 46.82 |
| 25.78, 23.62                                                                |

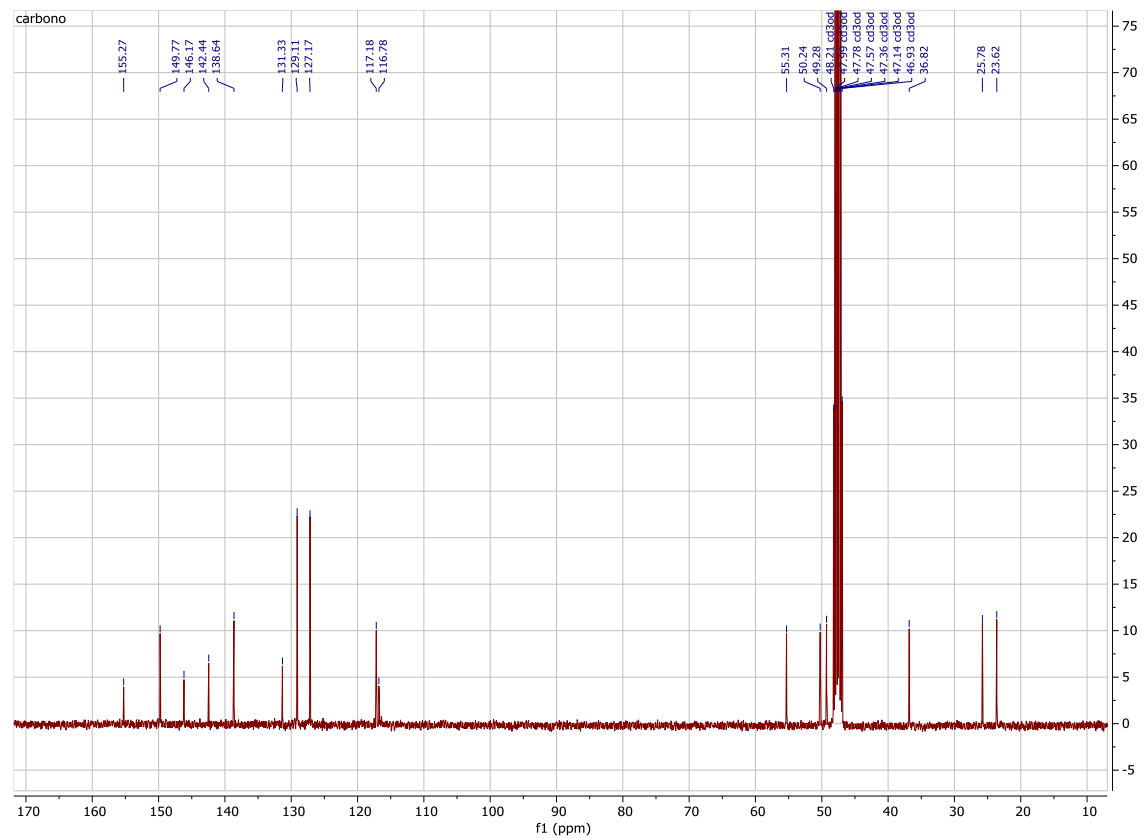

Fig-15

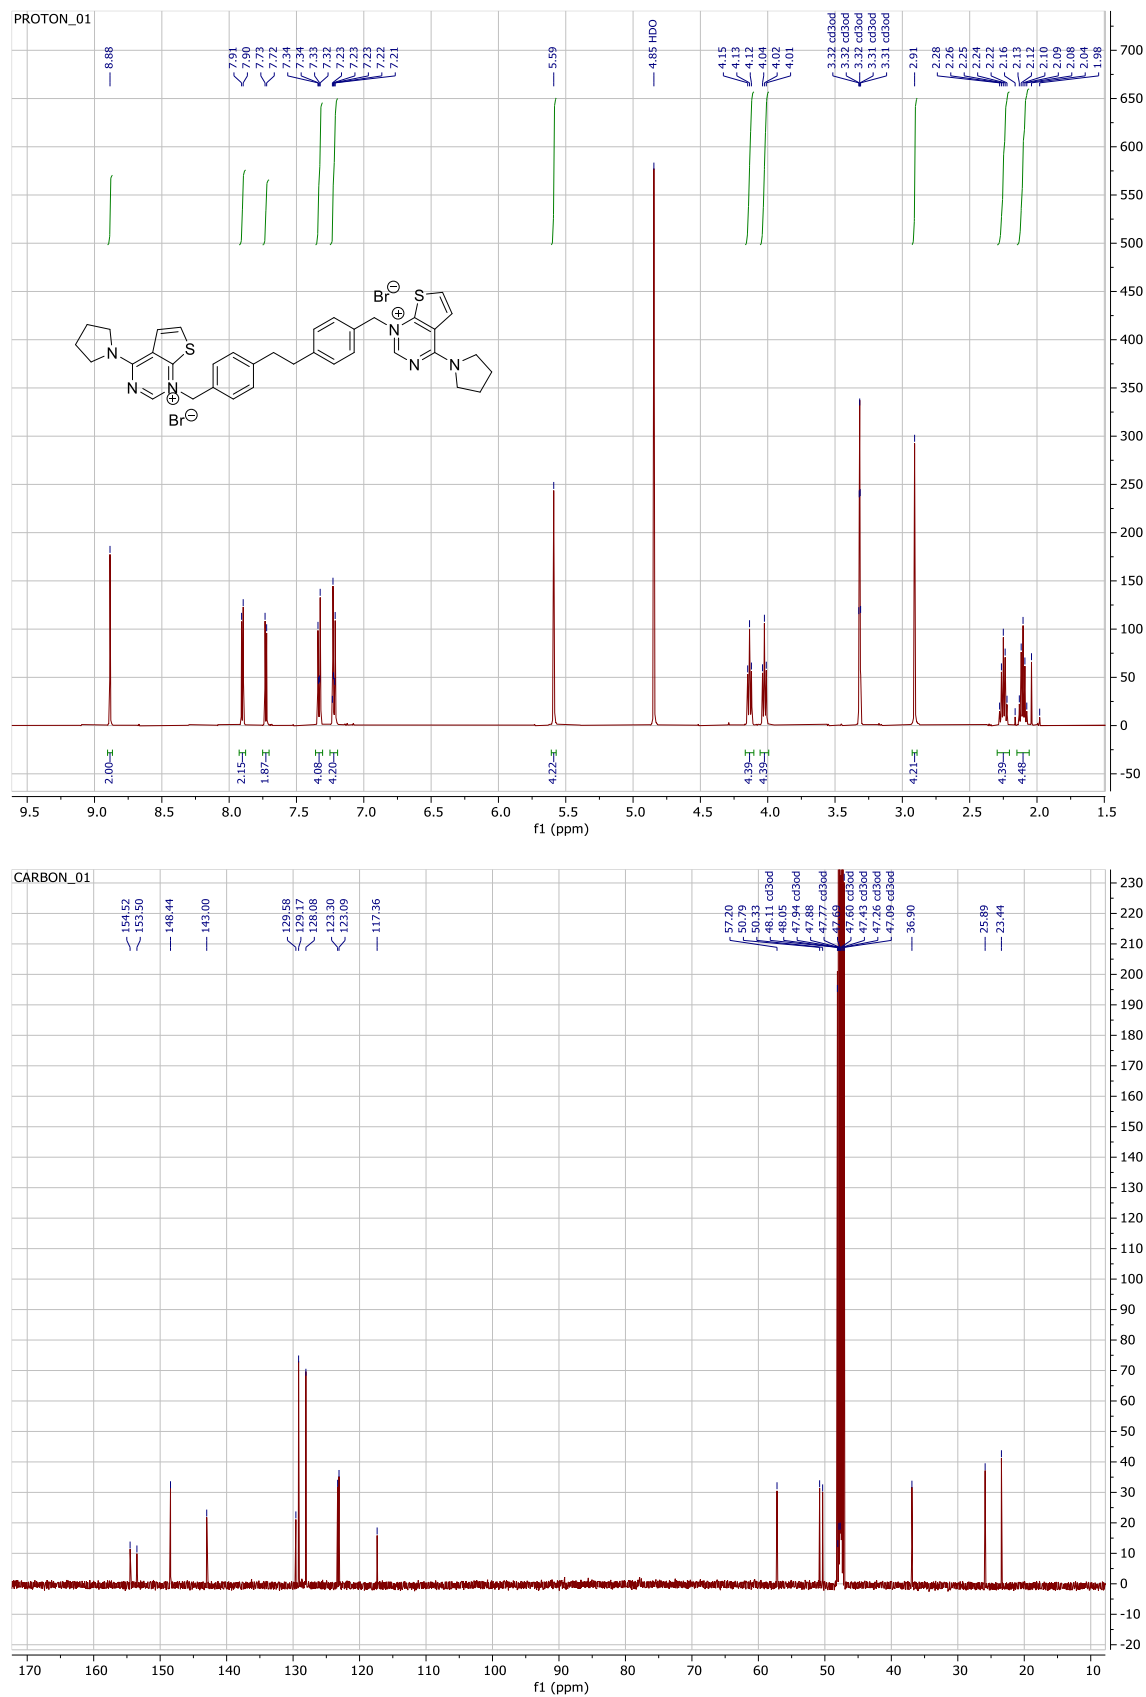

**Fa-25**

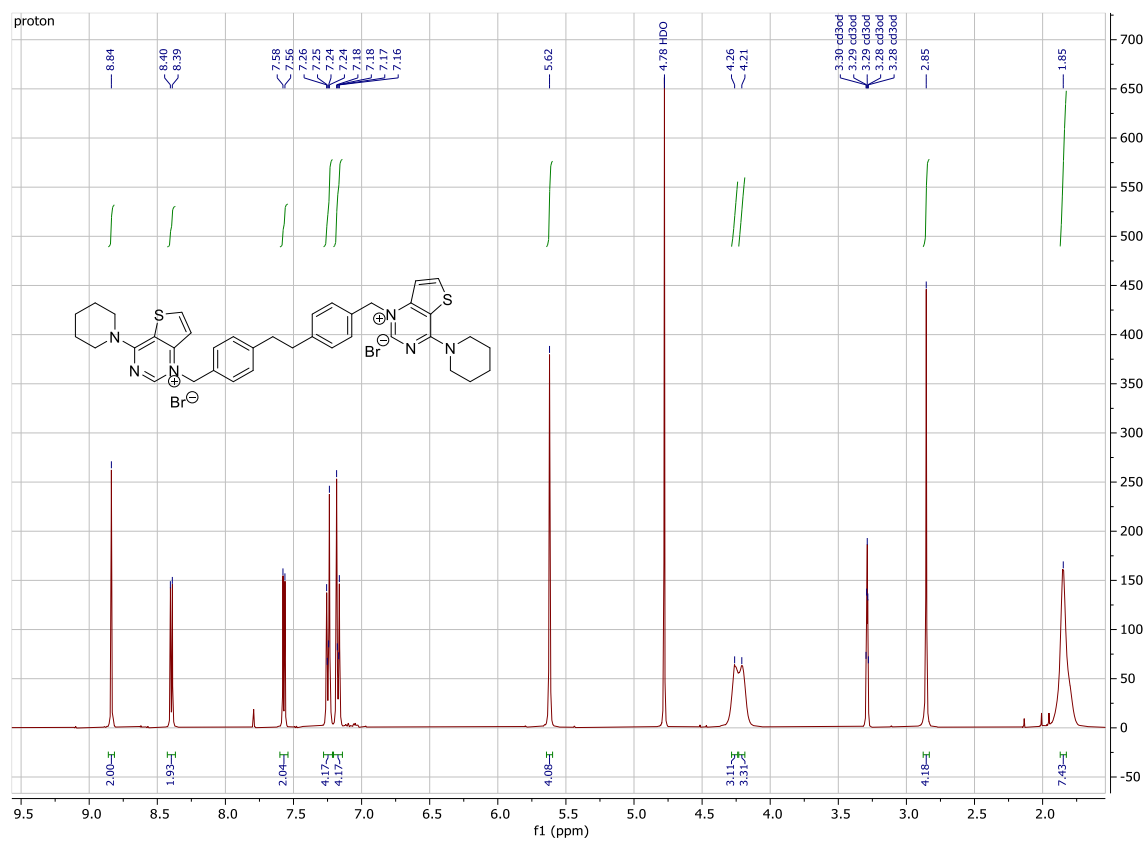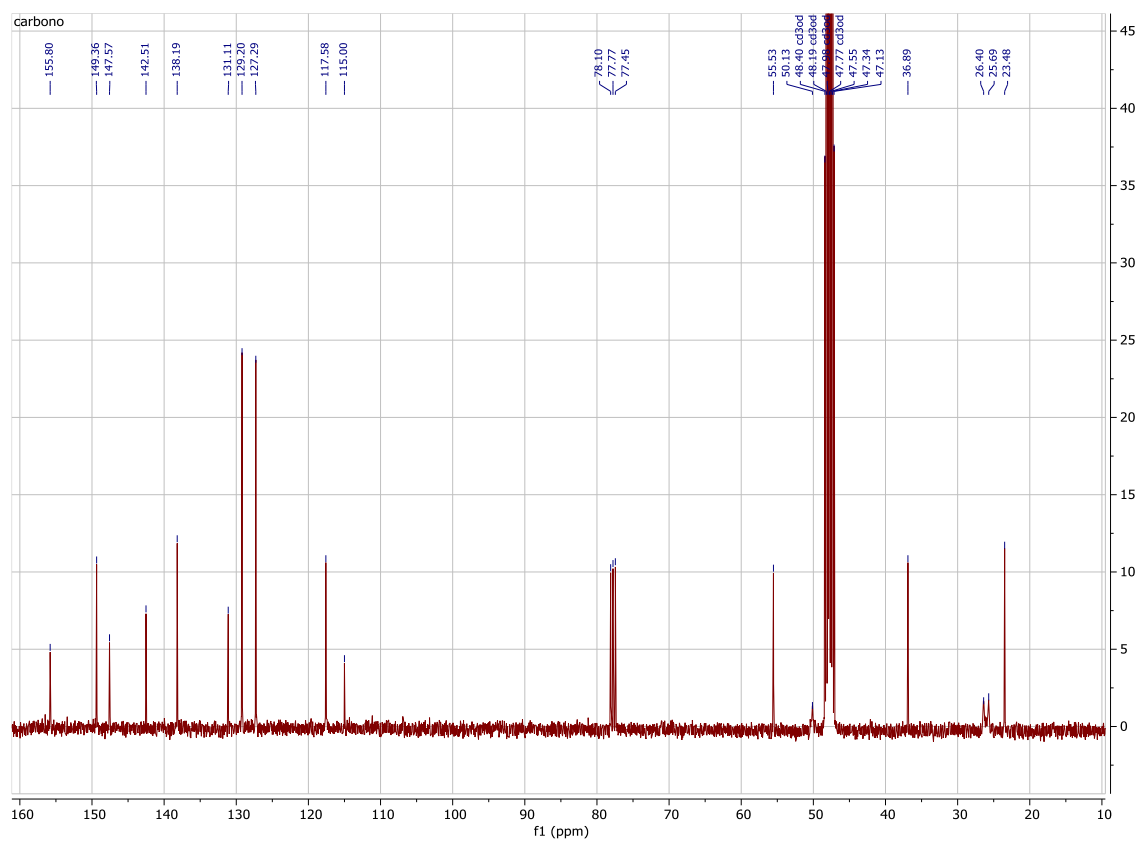

Fig-31

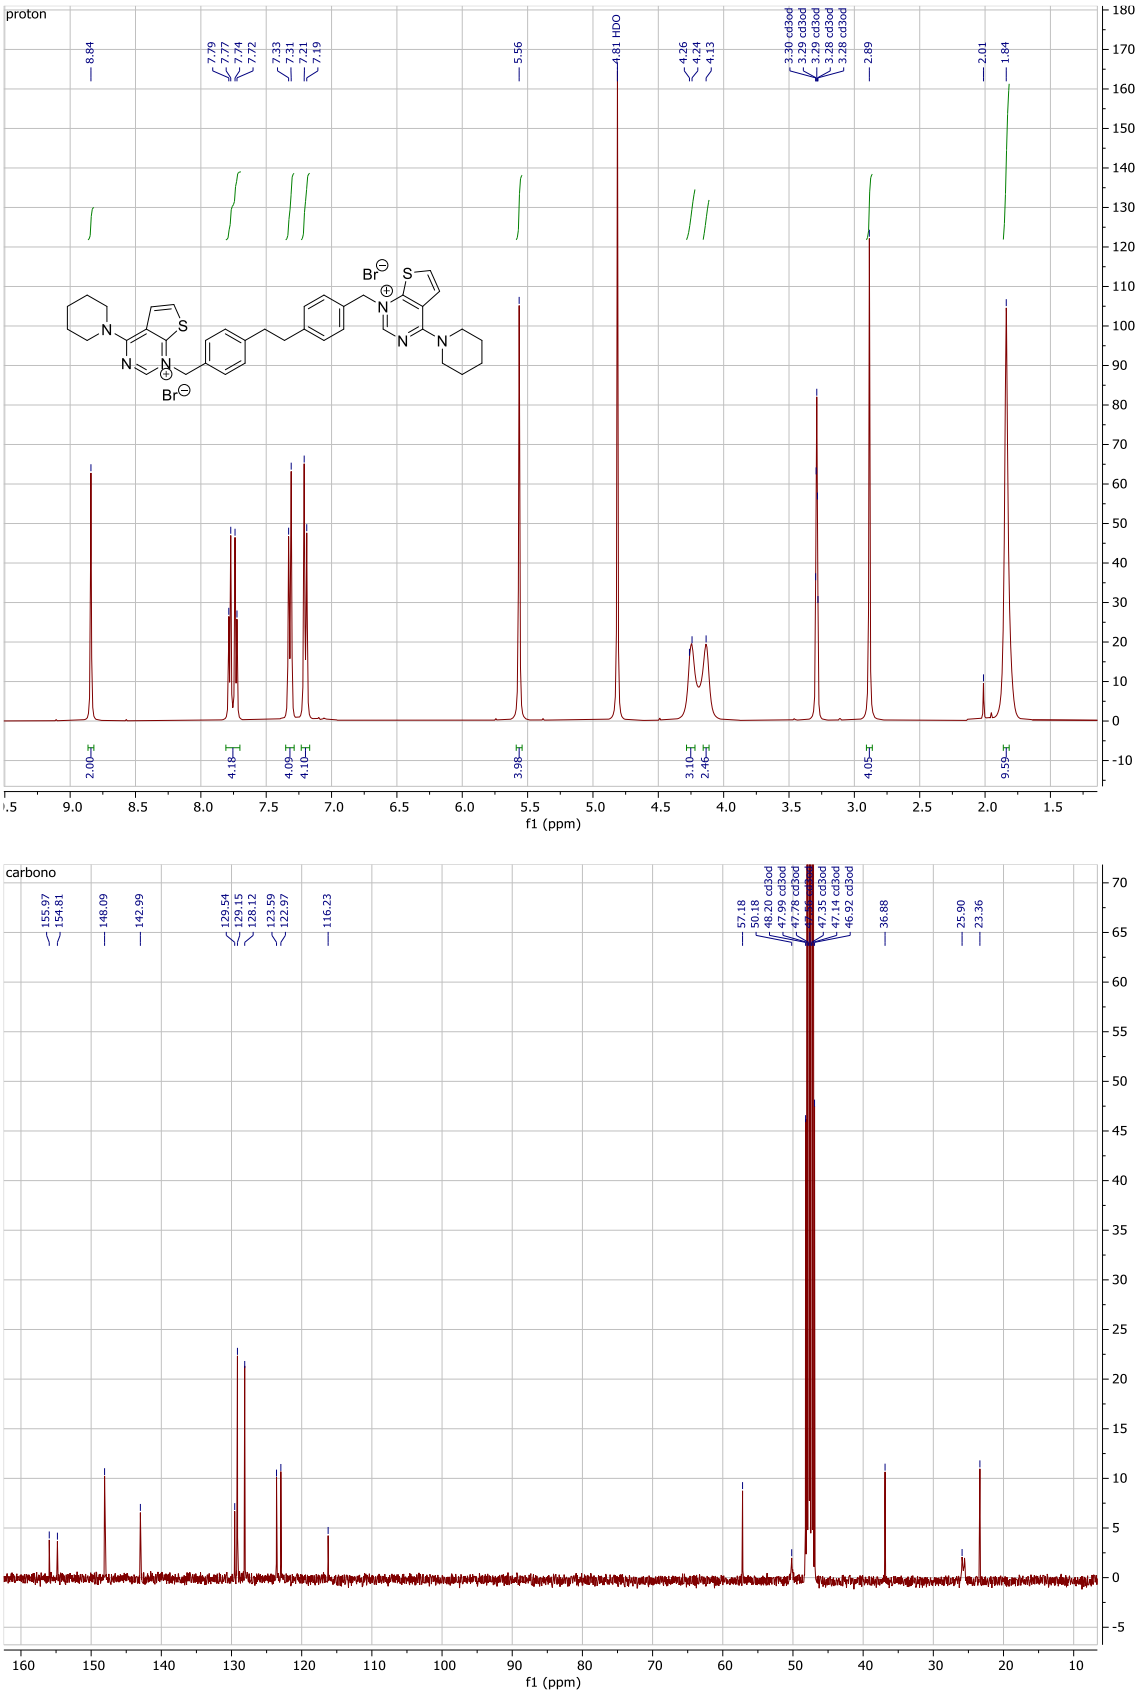



# Fa-23

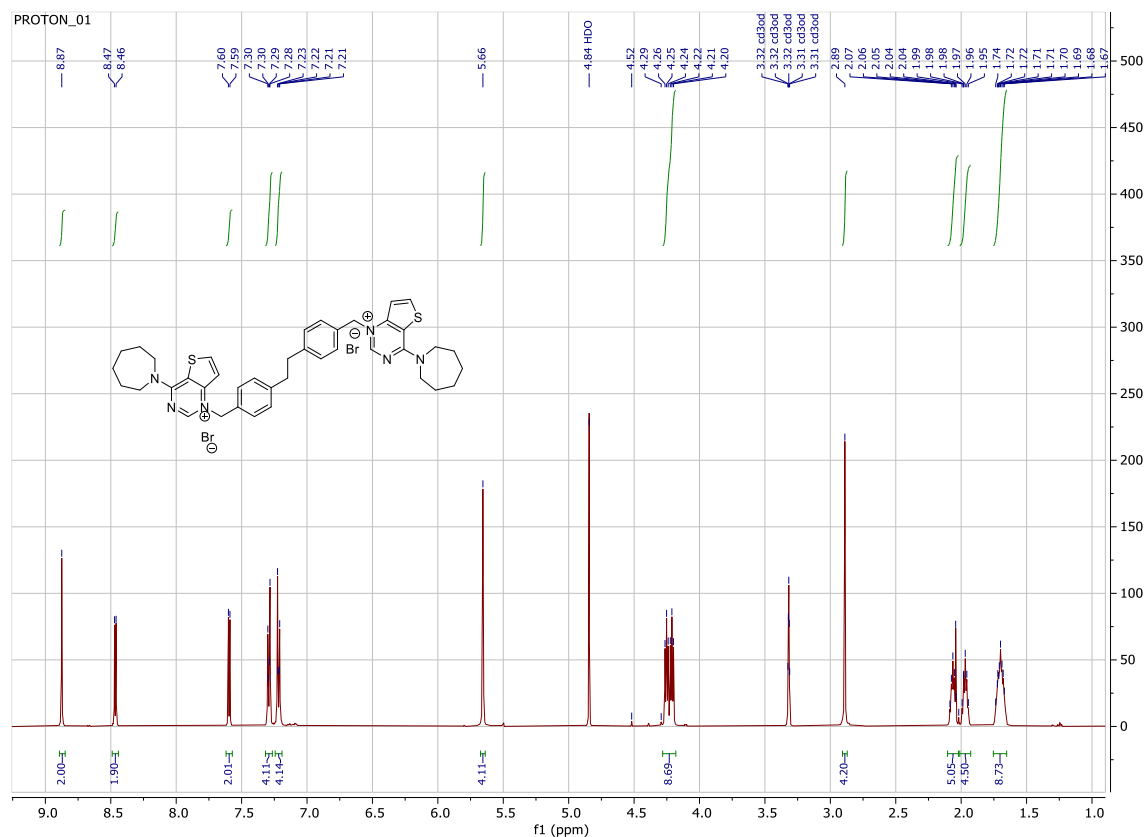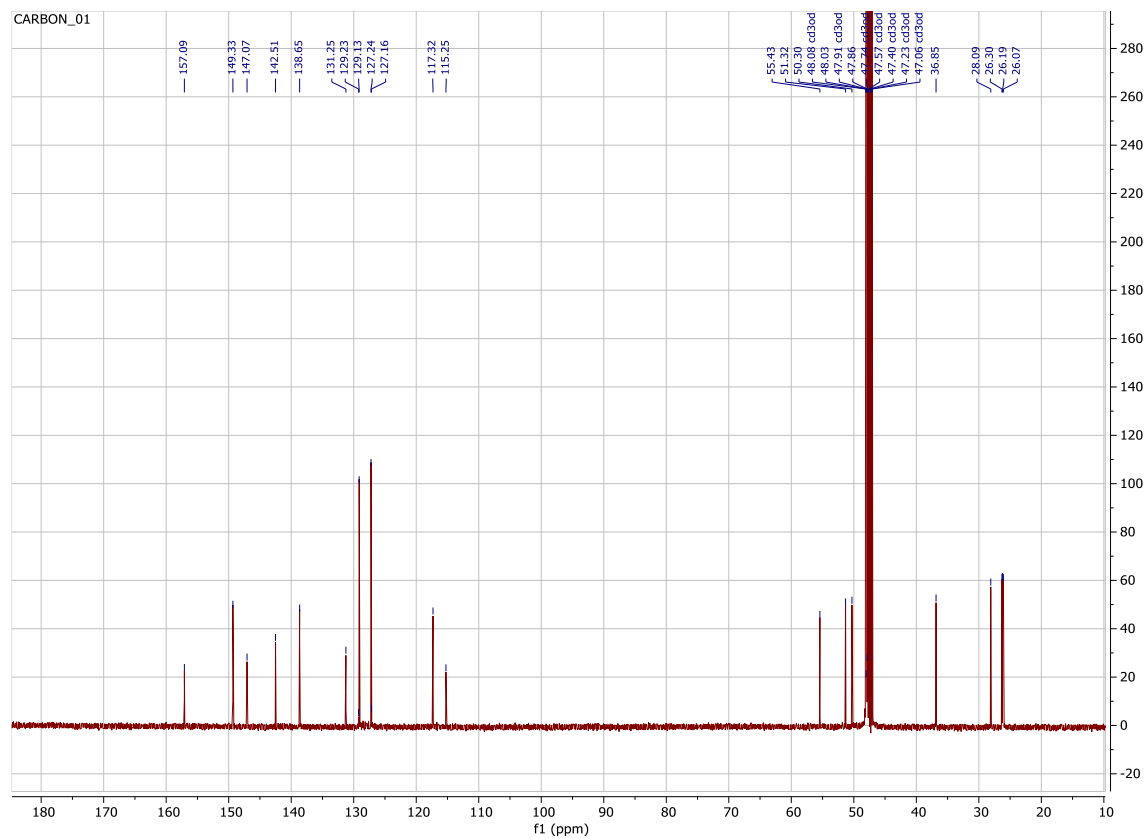

Fg-19

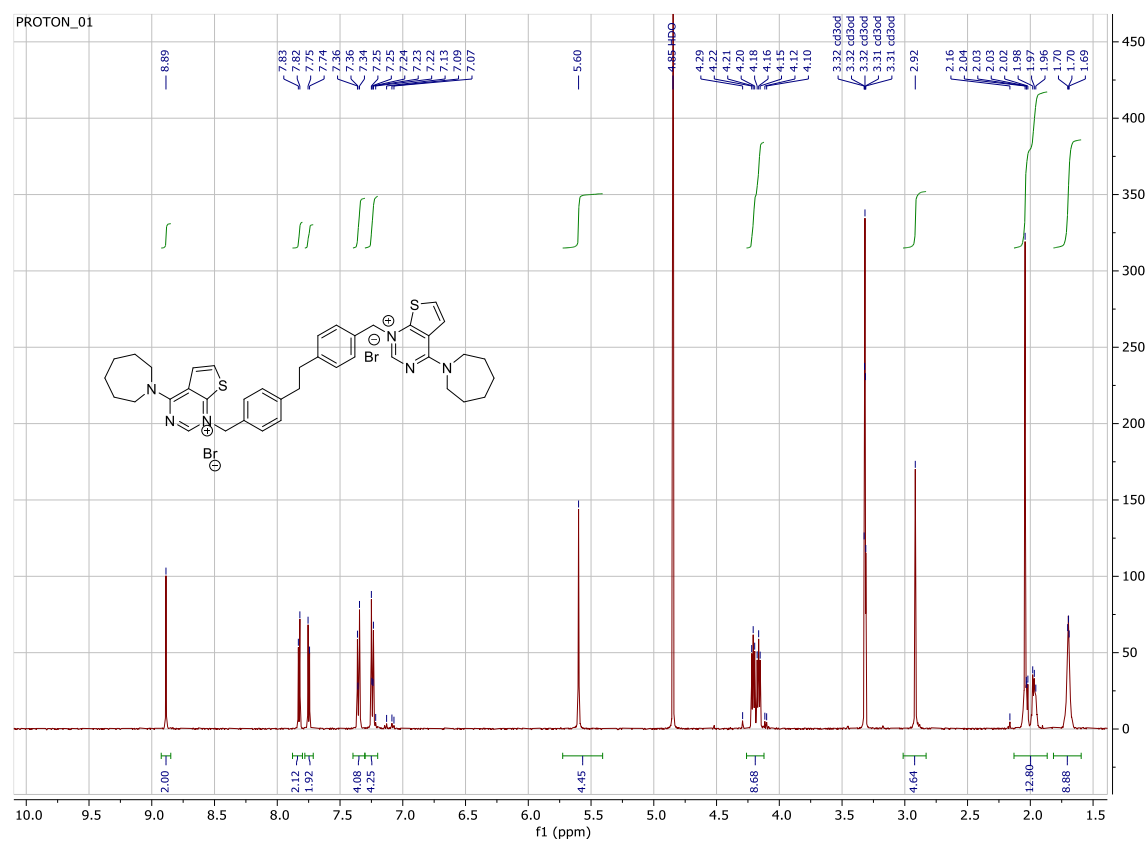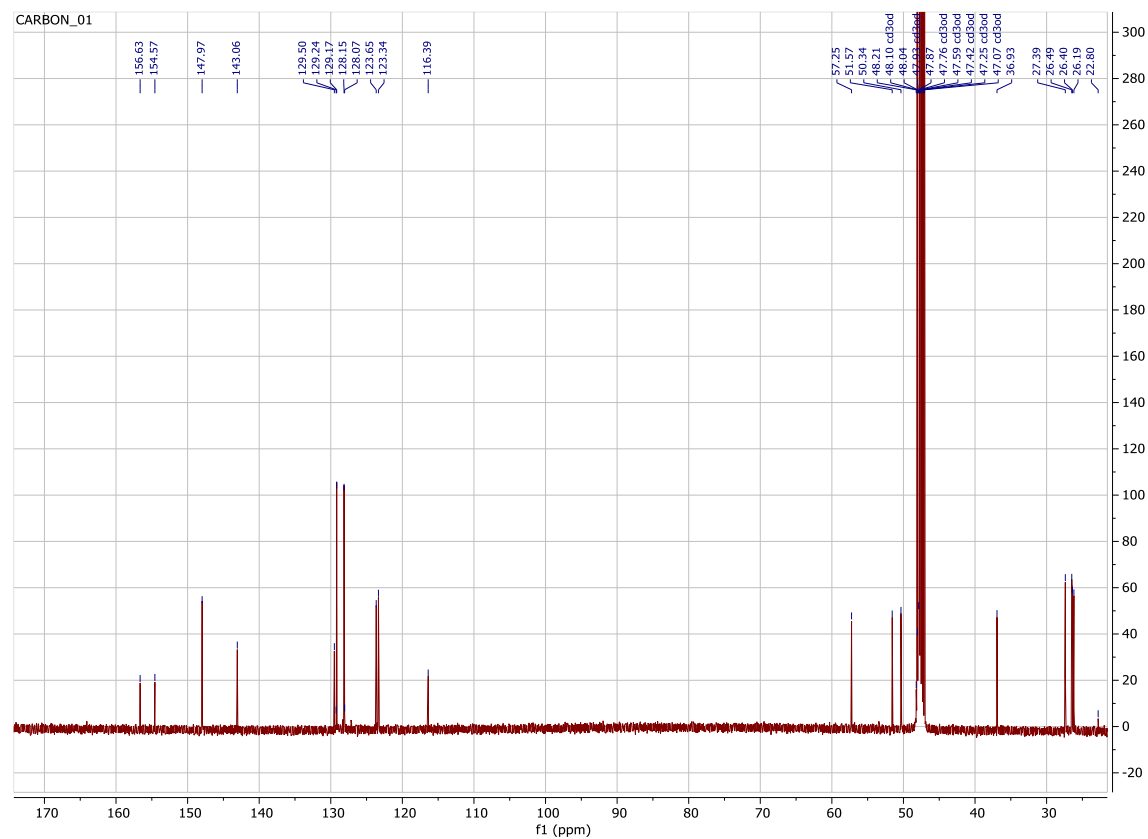

## Ff-1

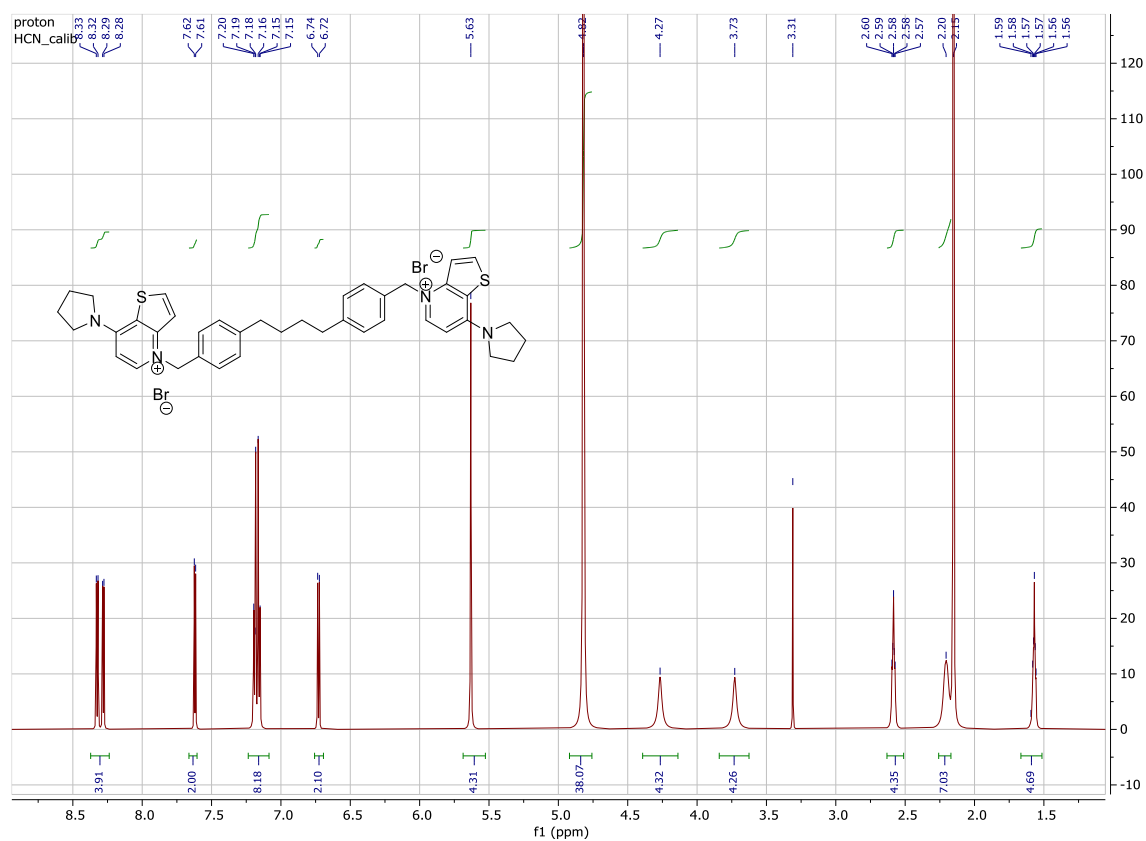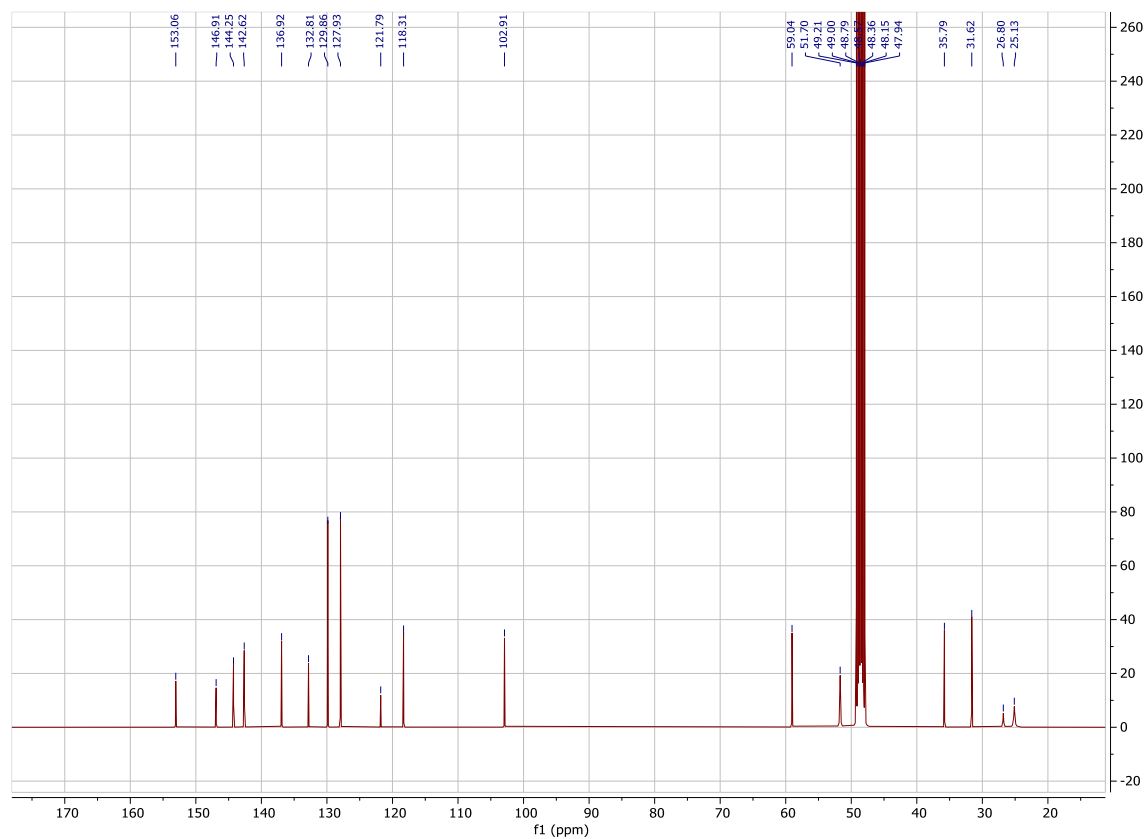

## Ff-7

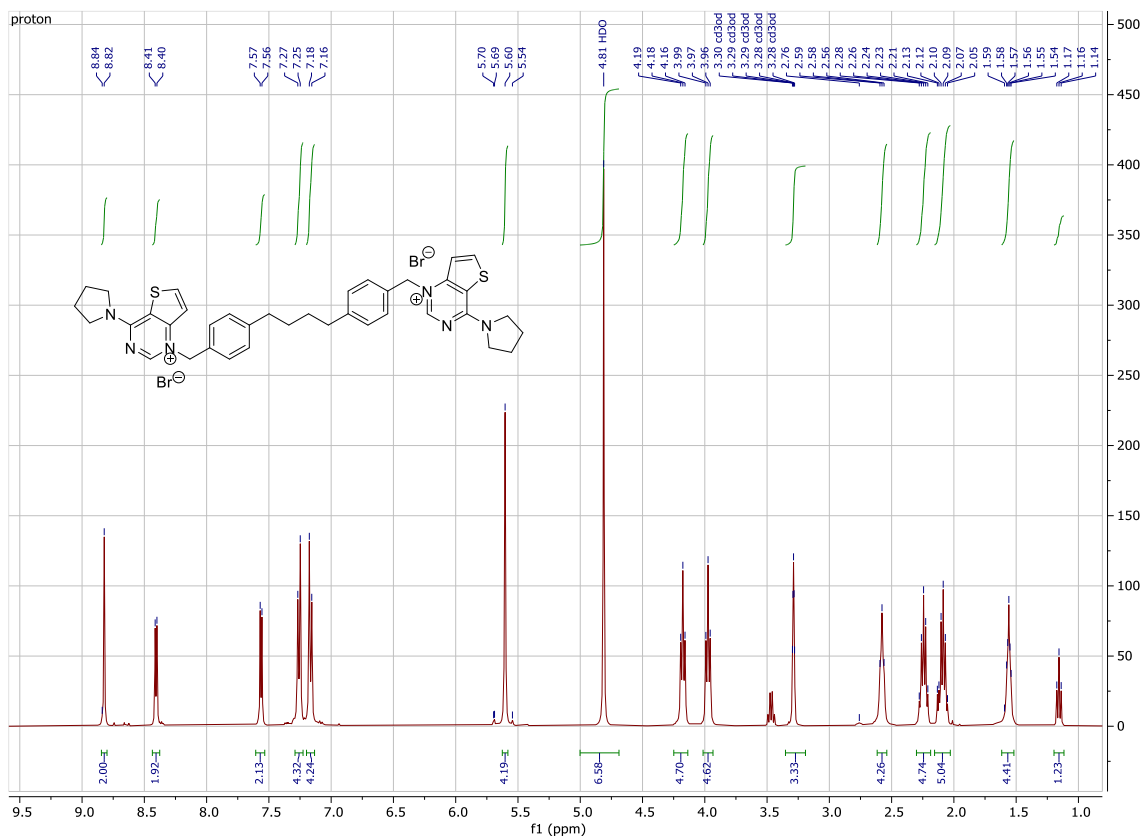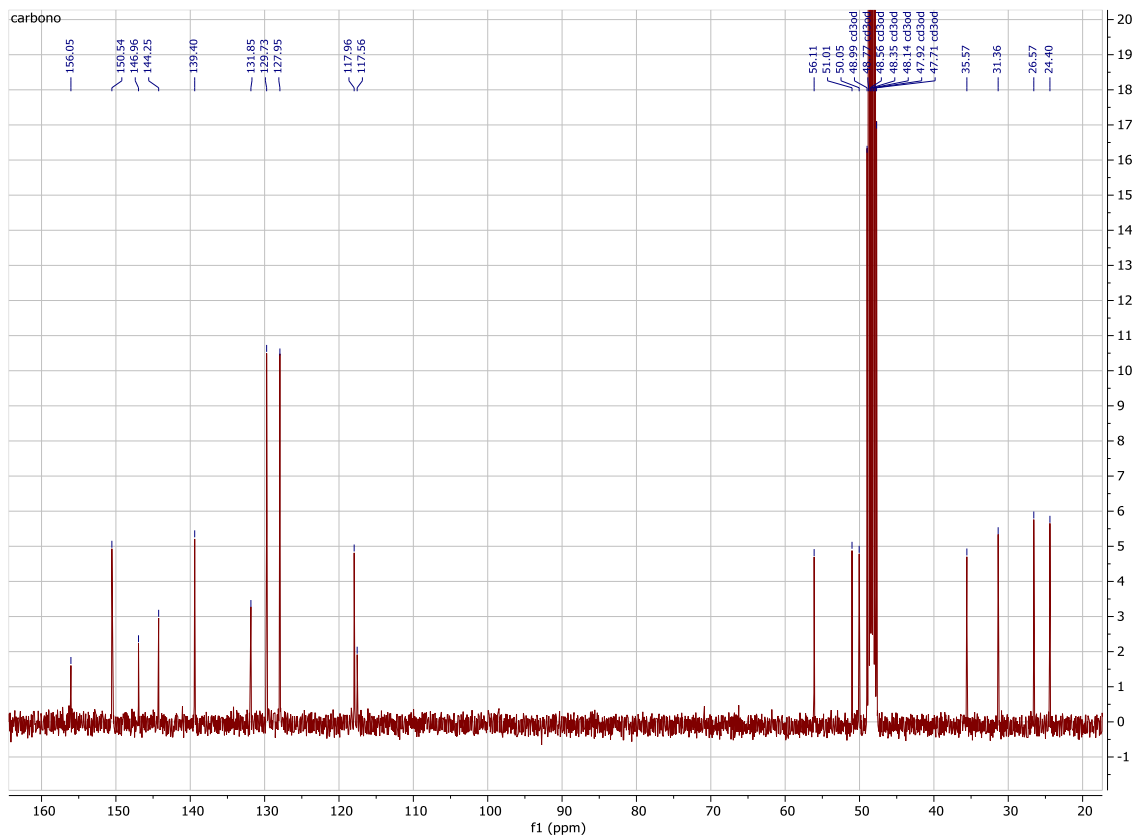

## Ff-3

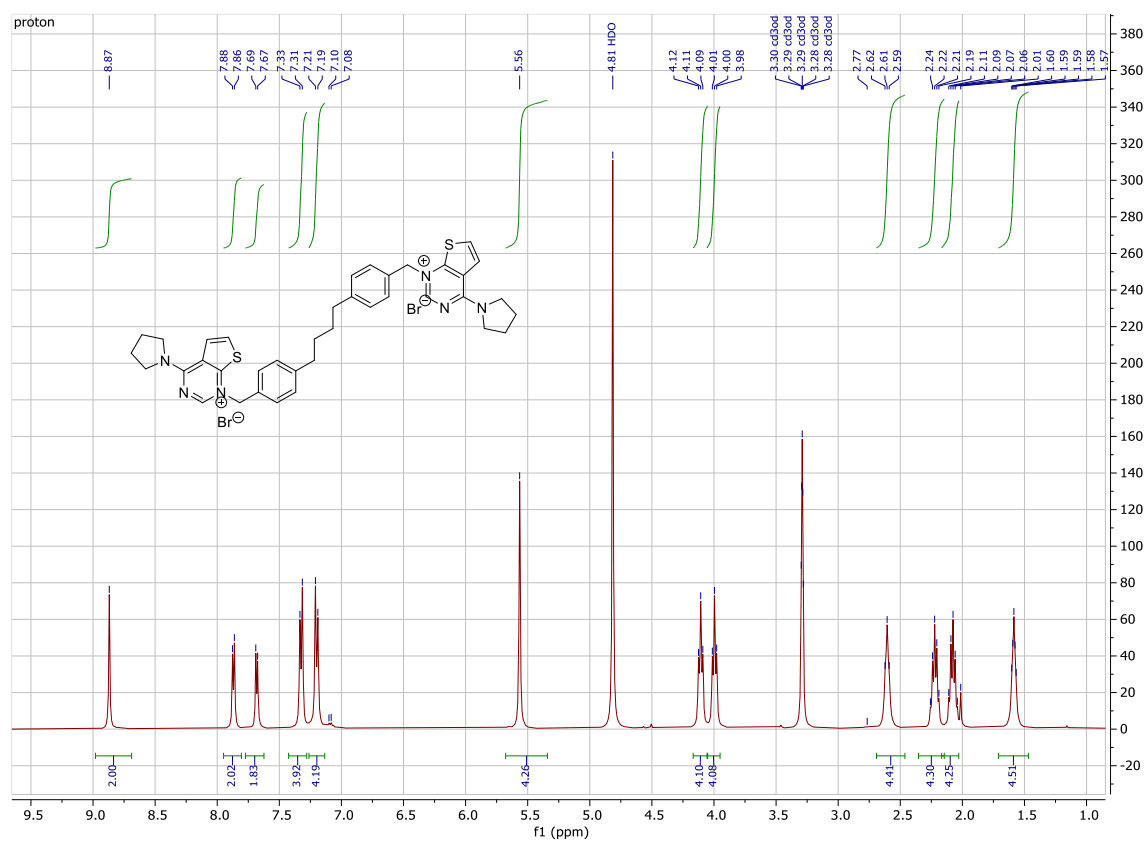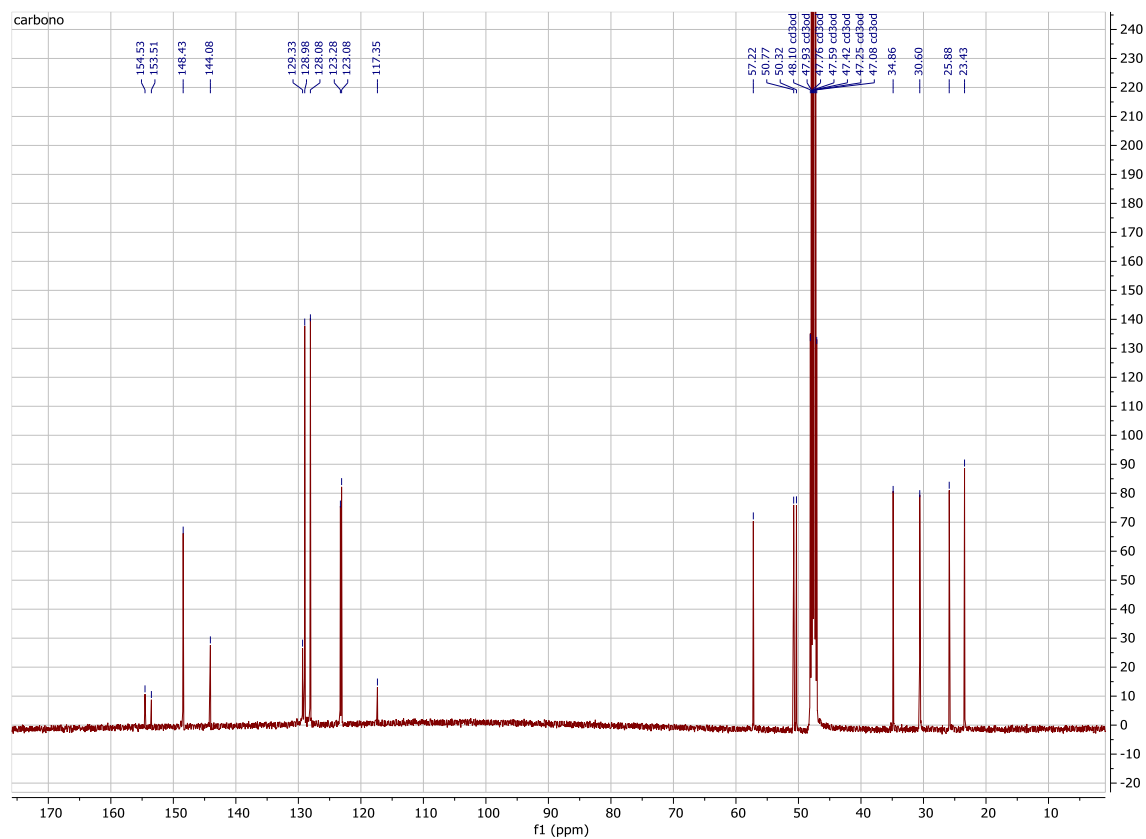

## Fa-33

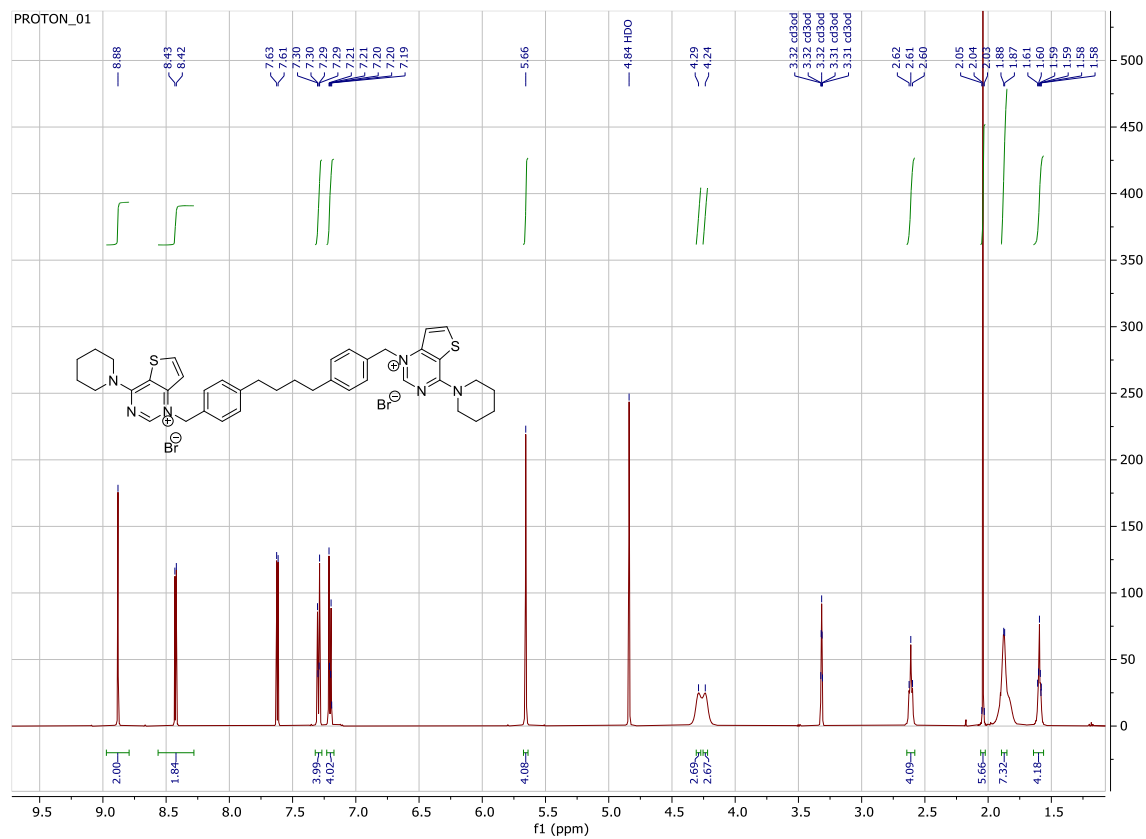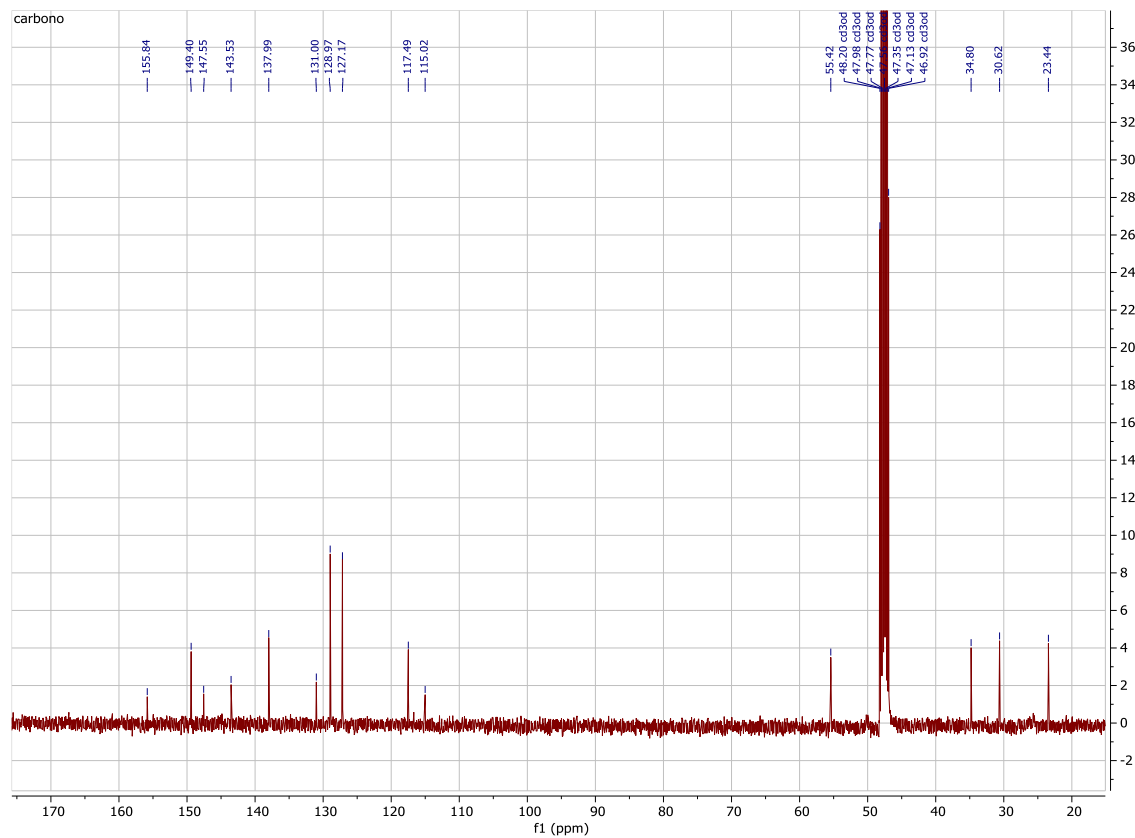

## Ff-6

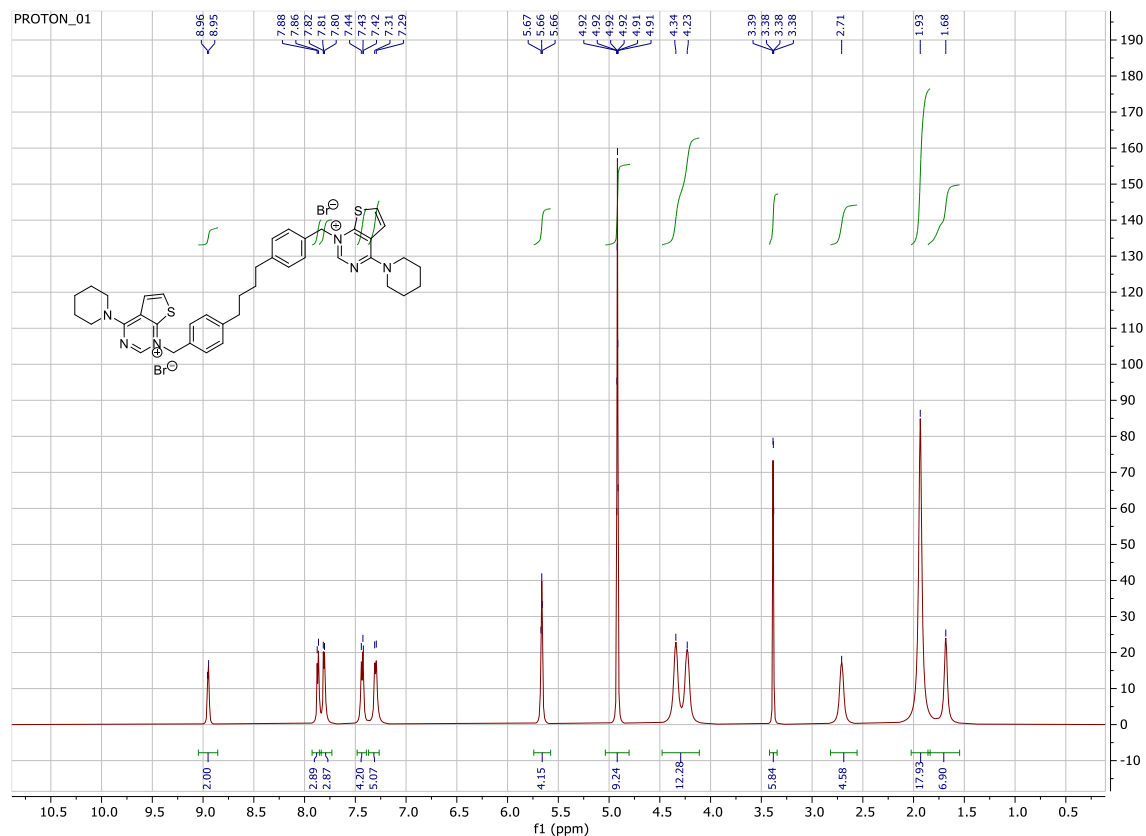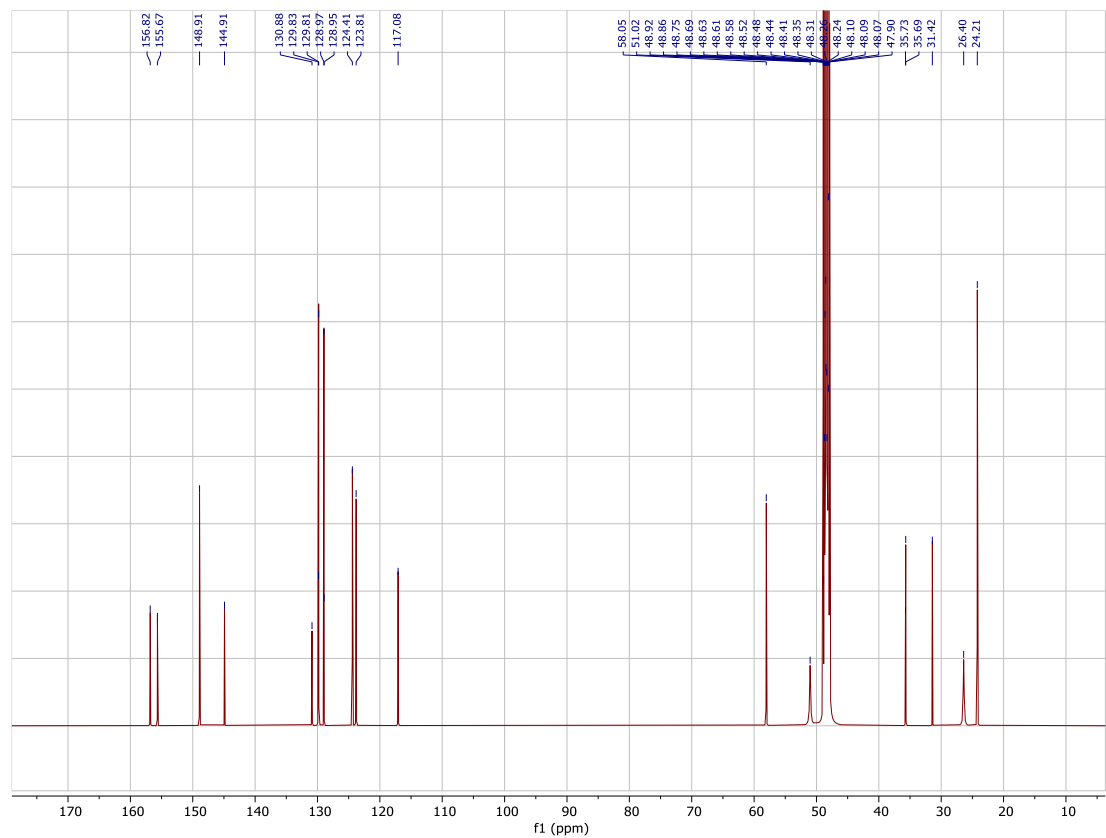

## Fa-29

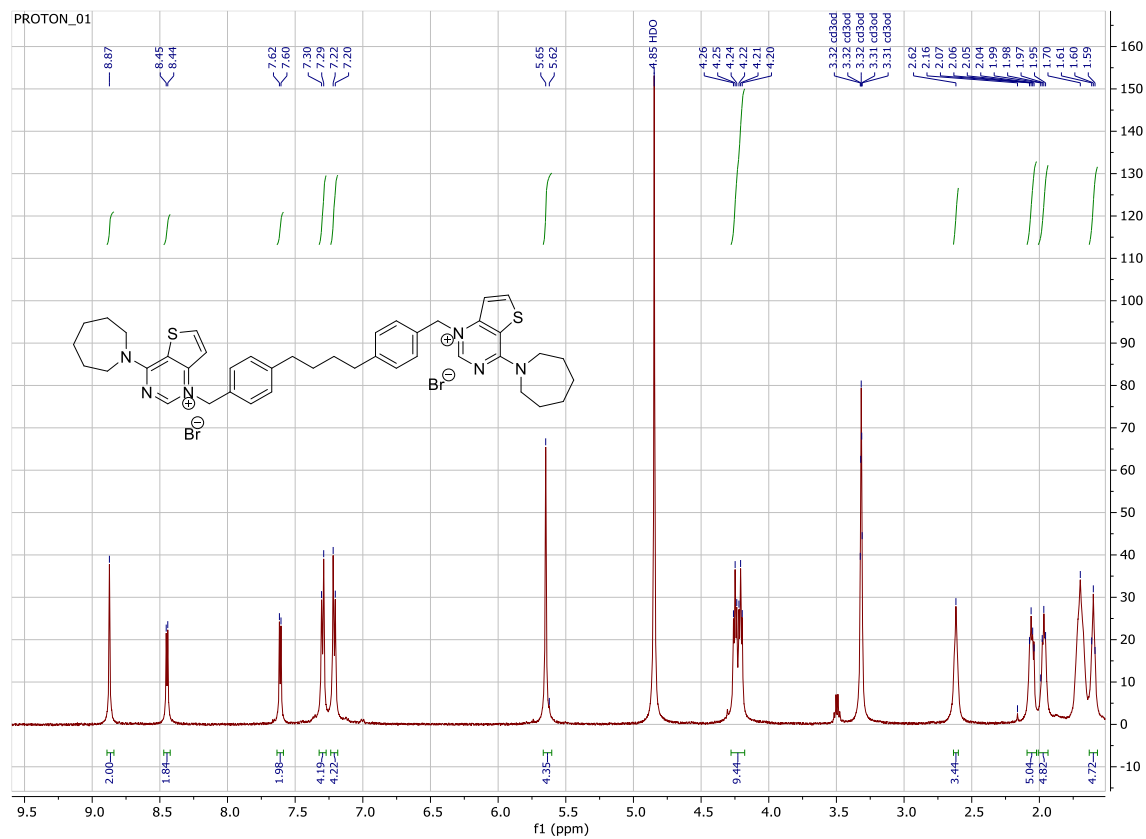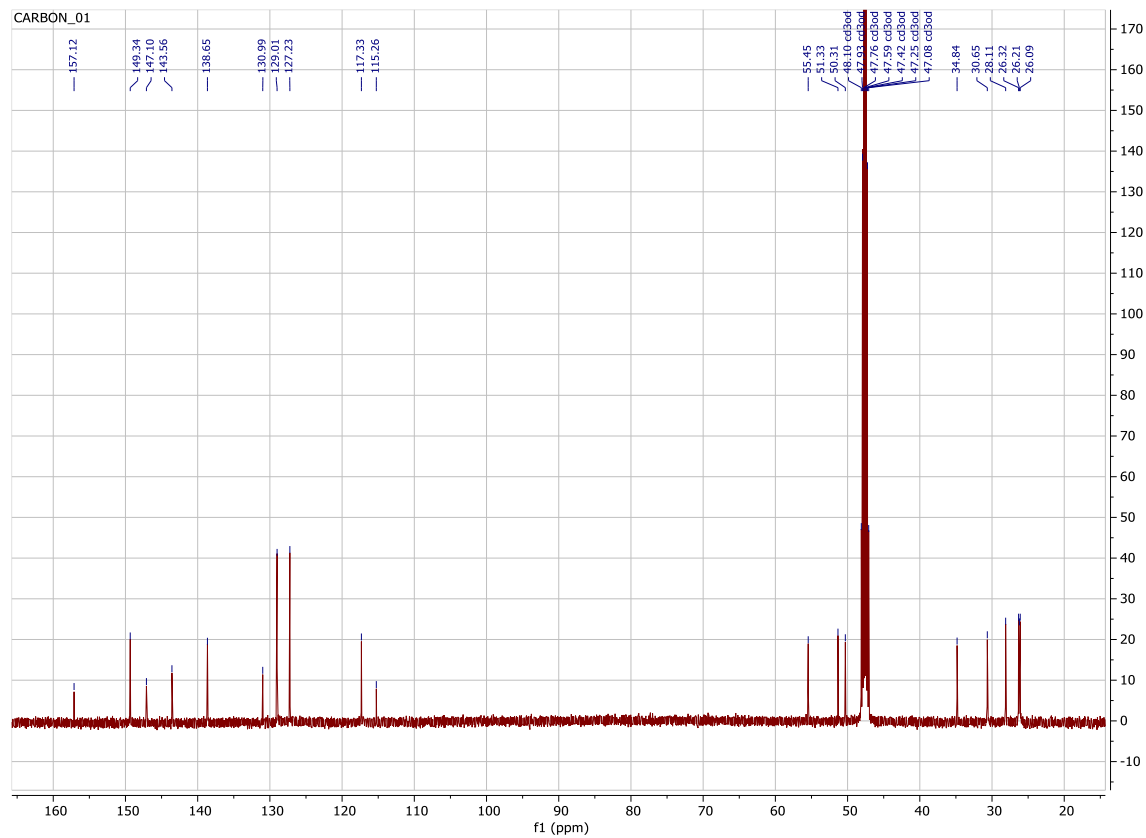



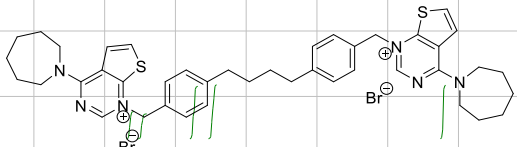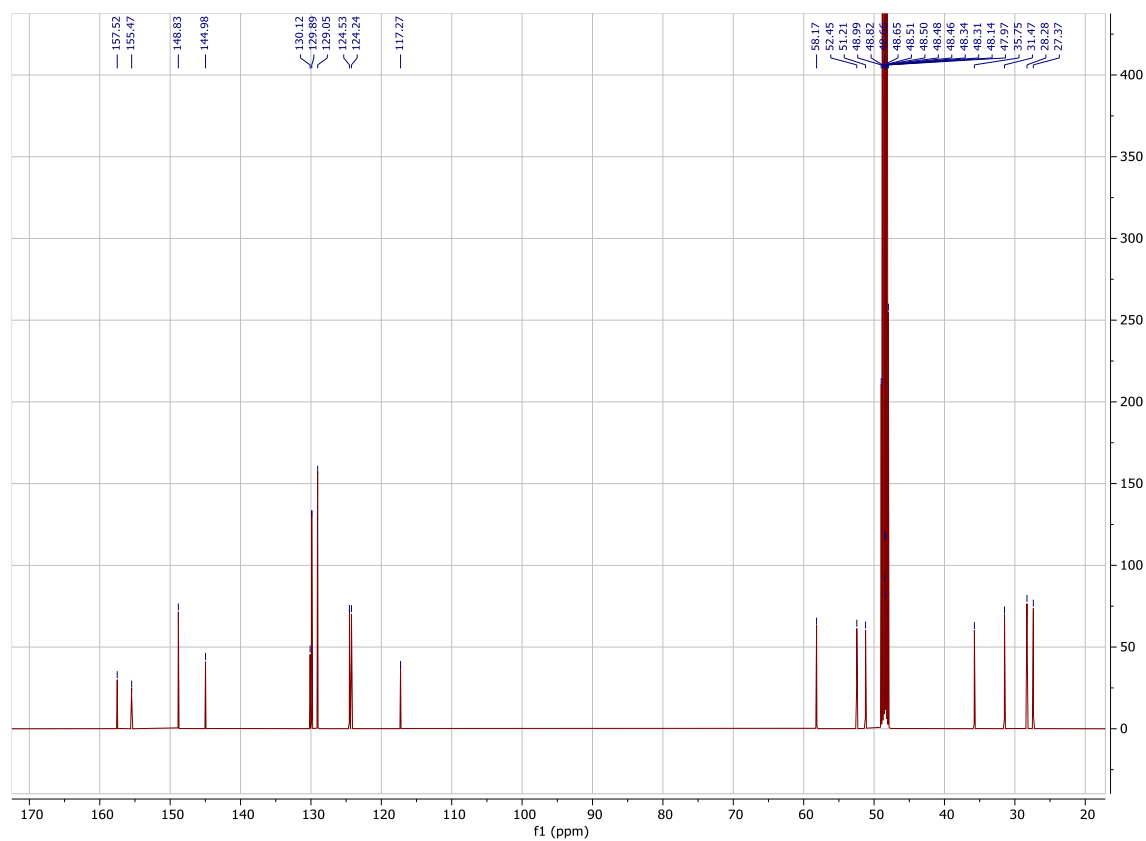

## Ff-2

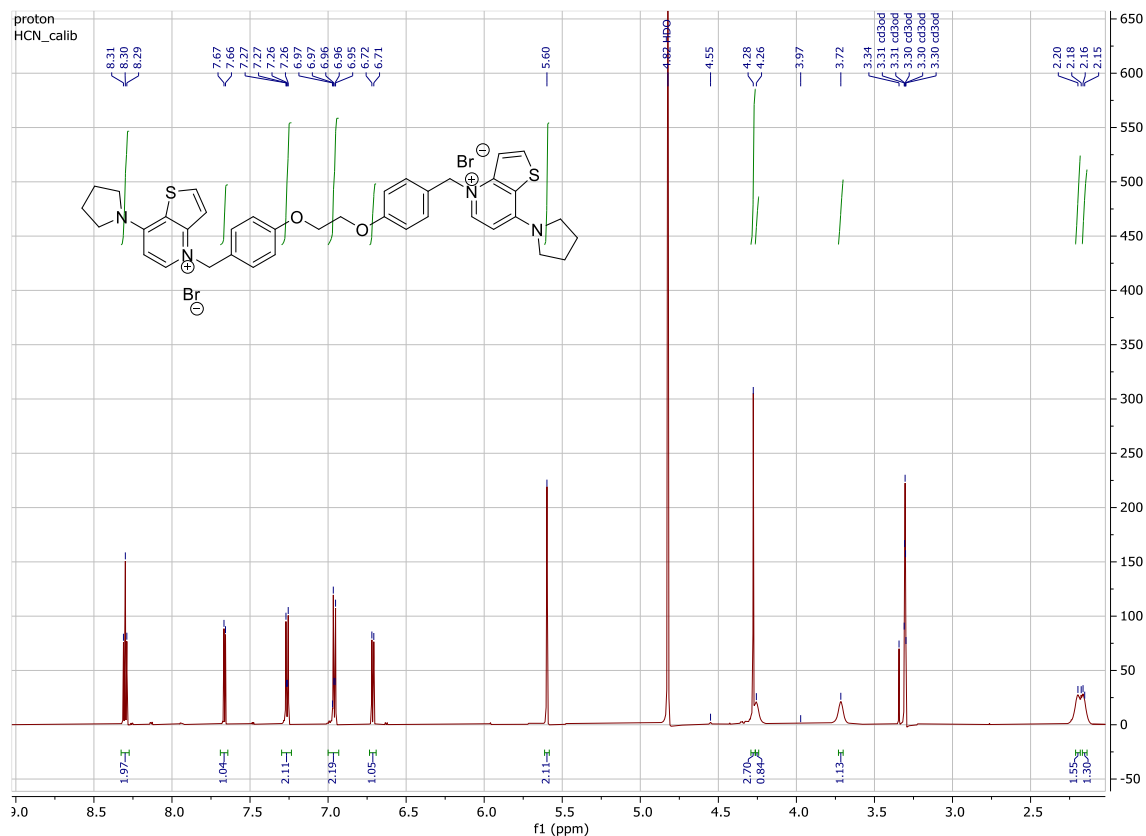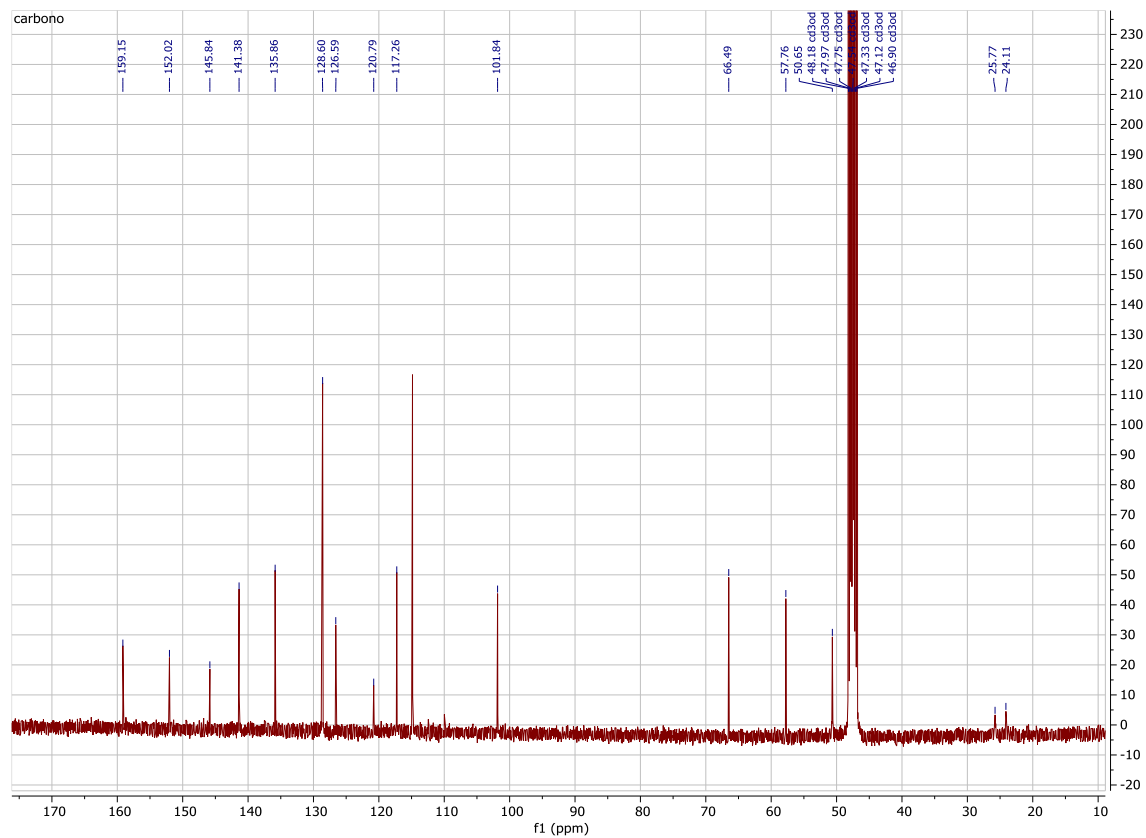

## Ff-8

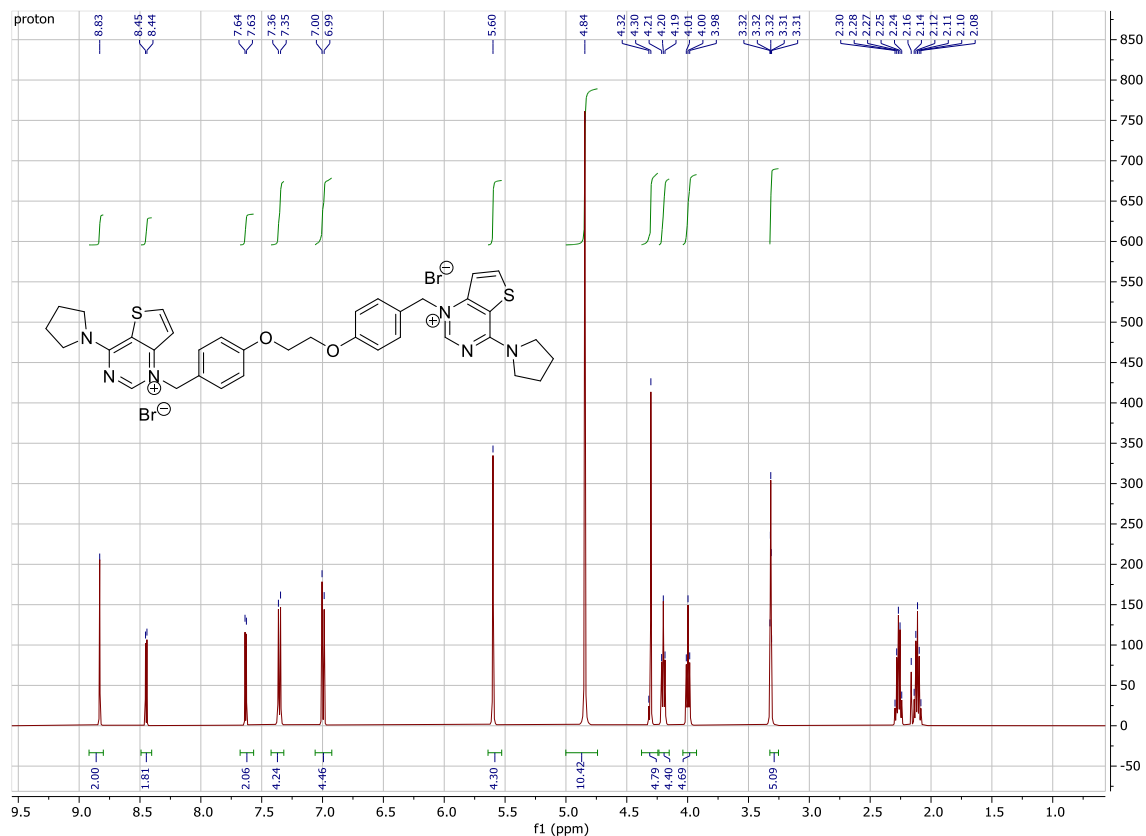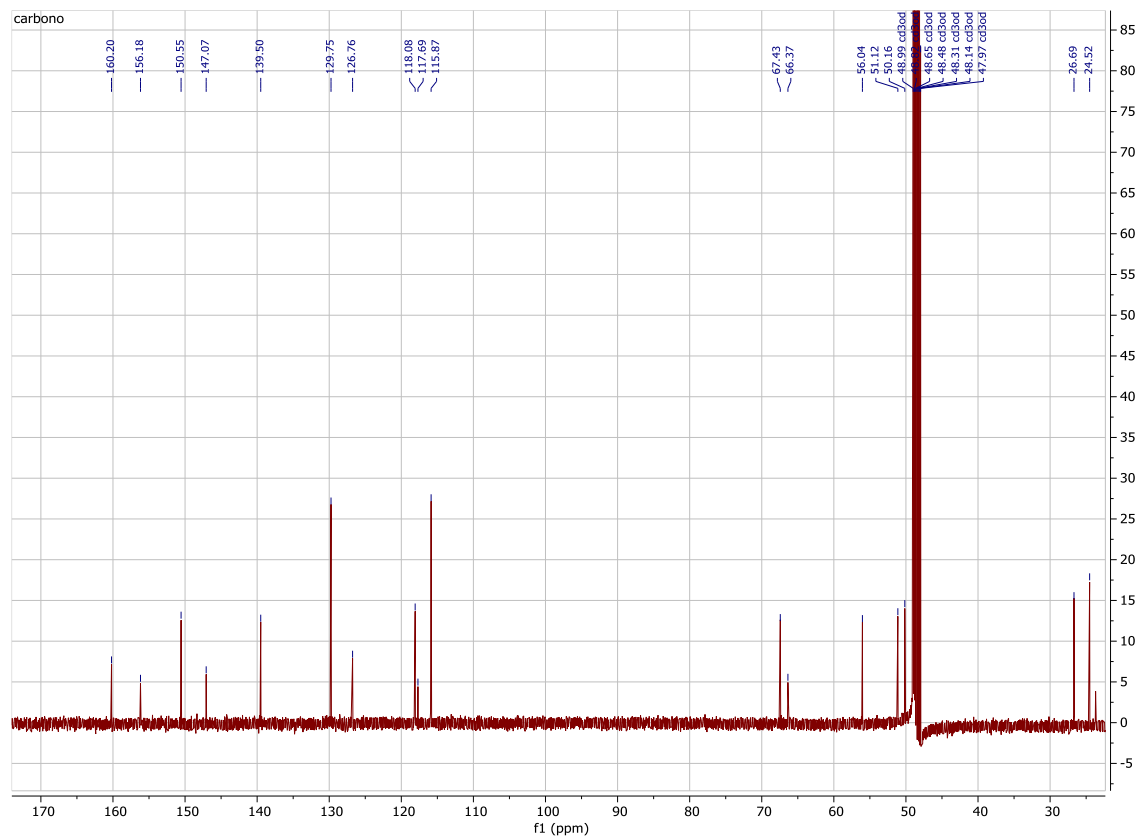

Ff-4

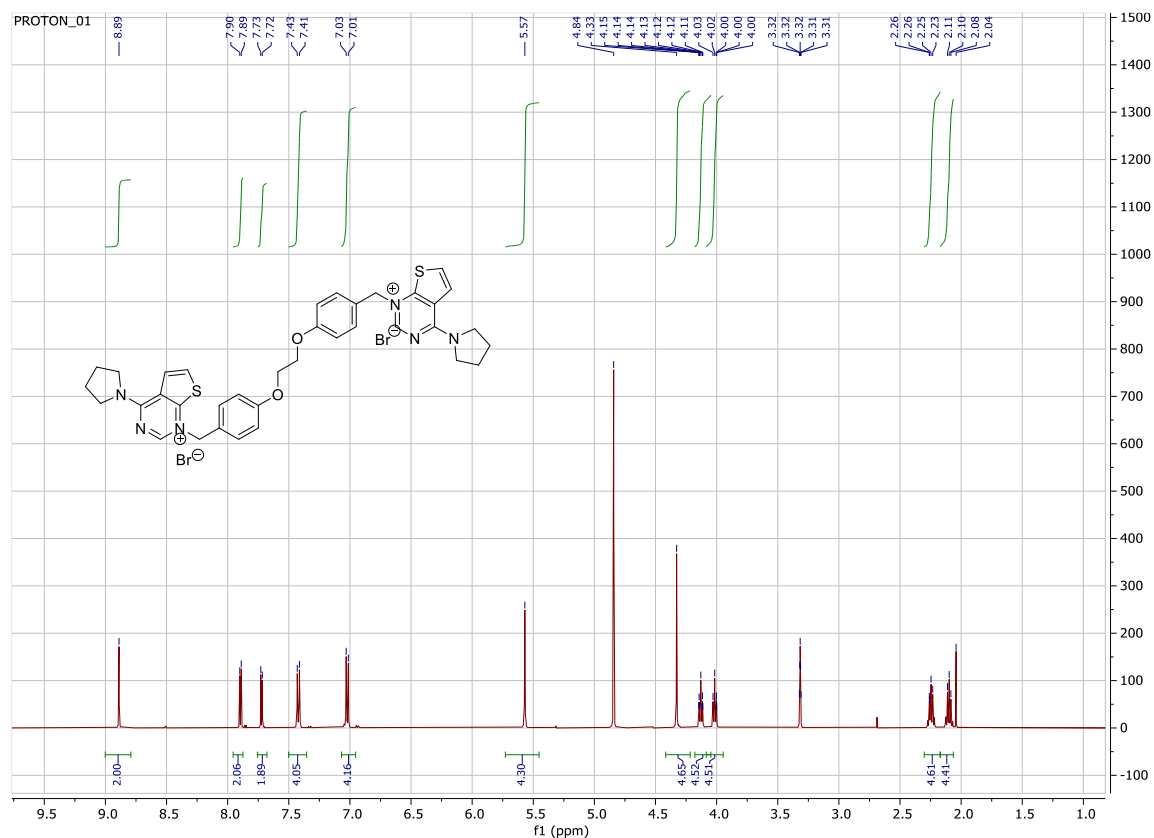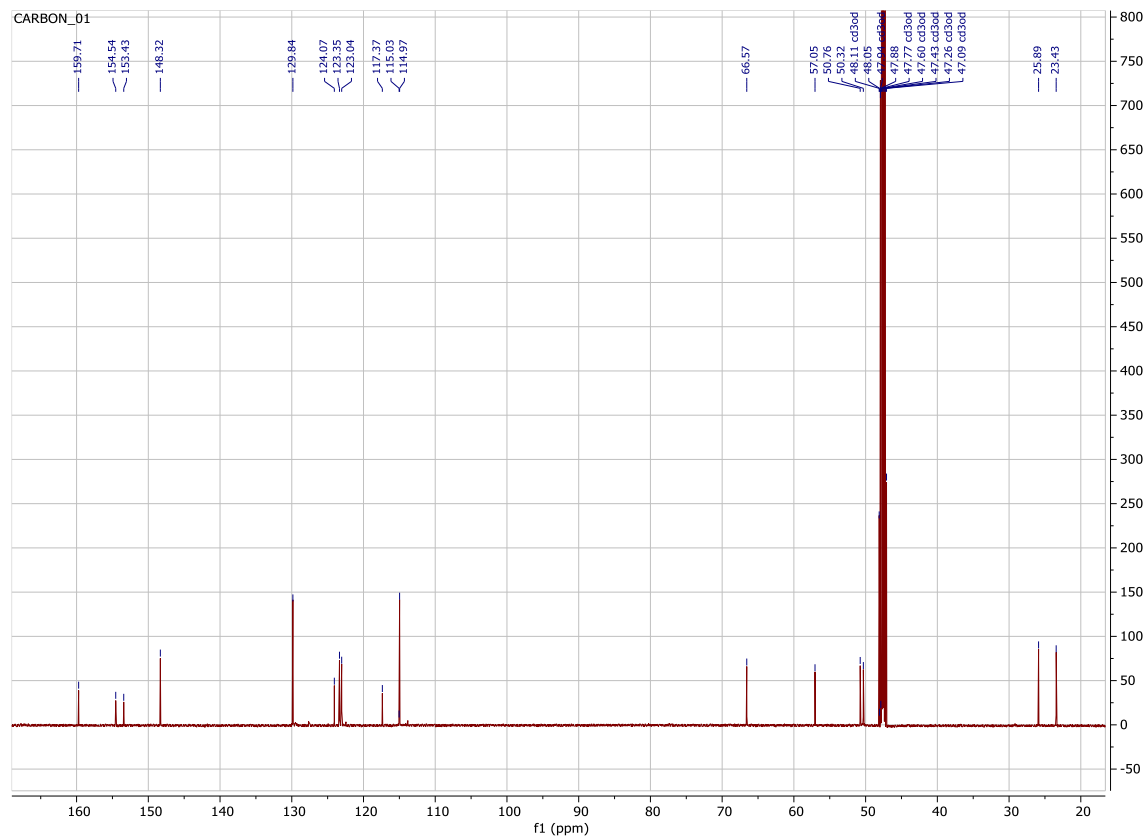

Fa-28

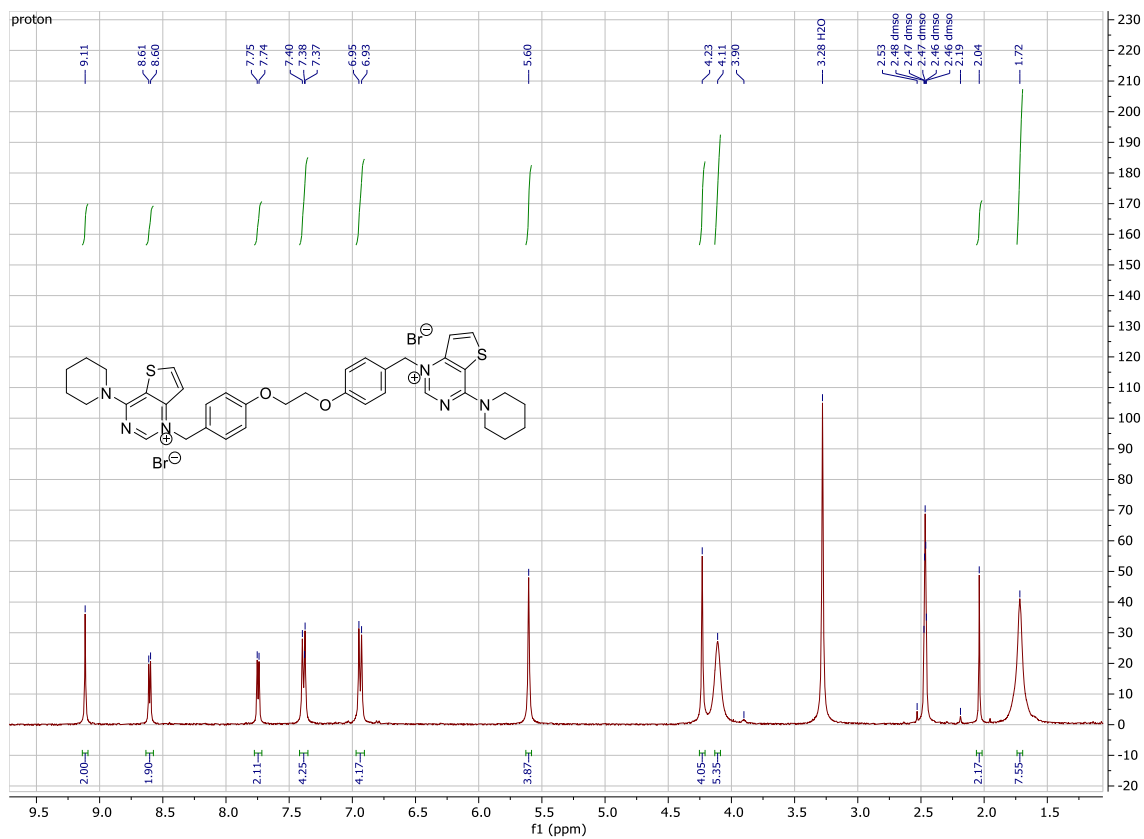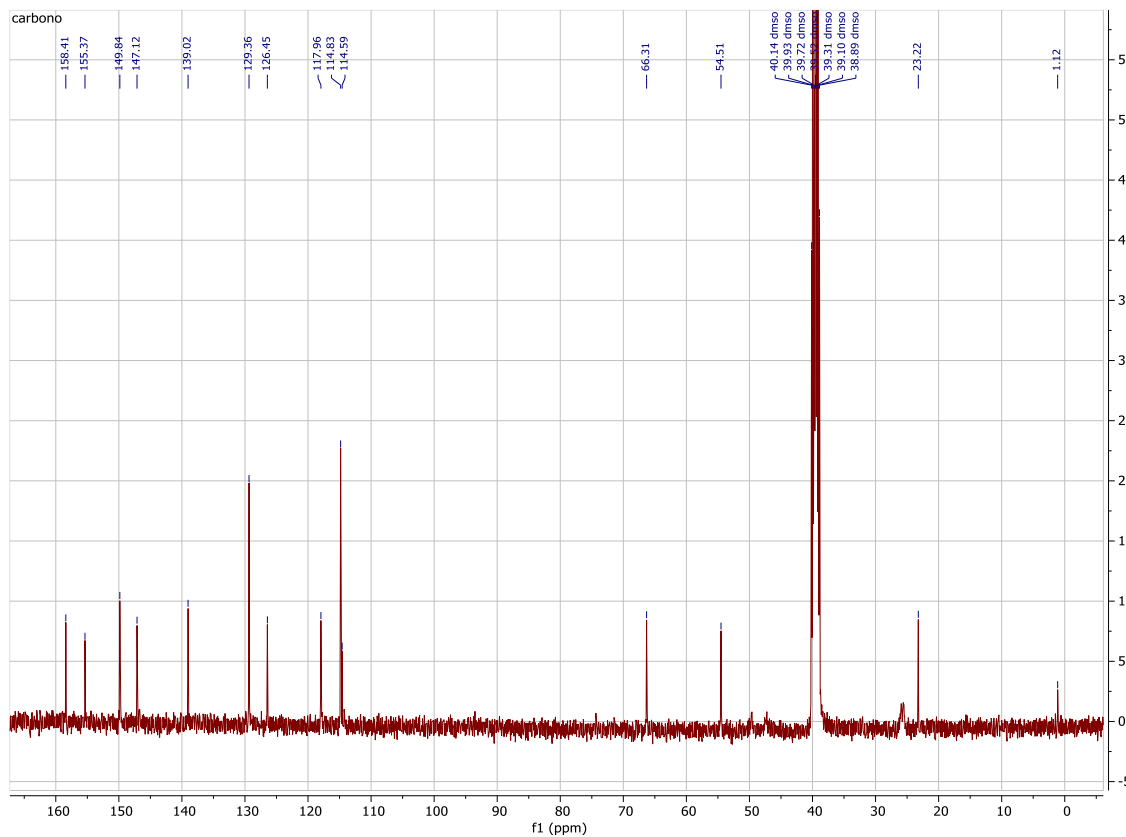

## Ff-5

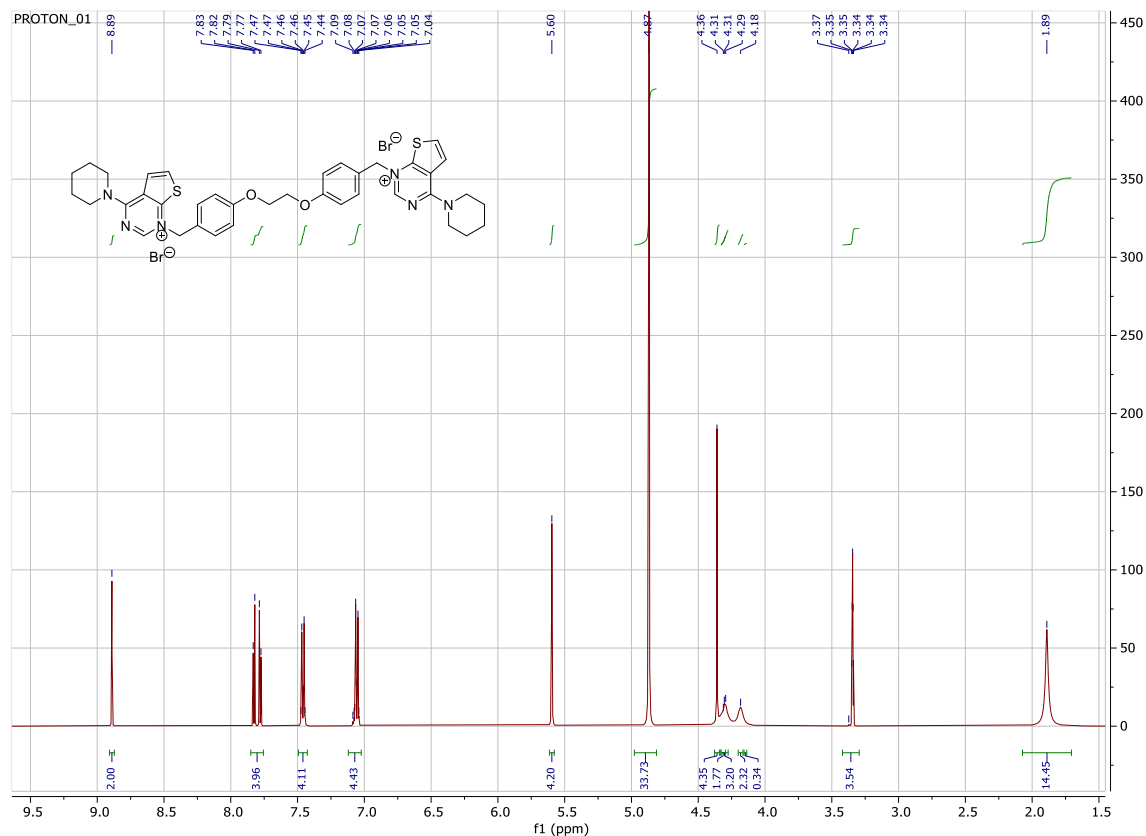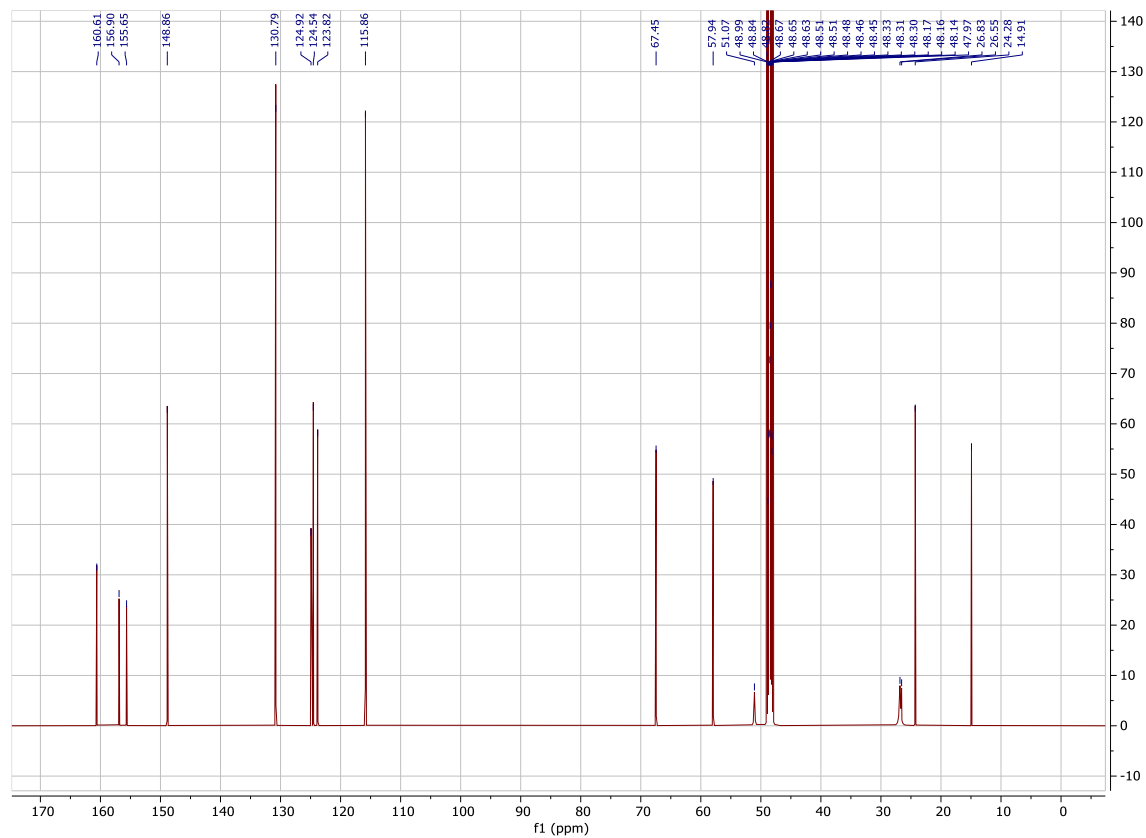

## Ff-34

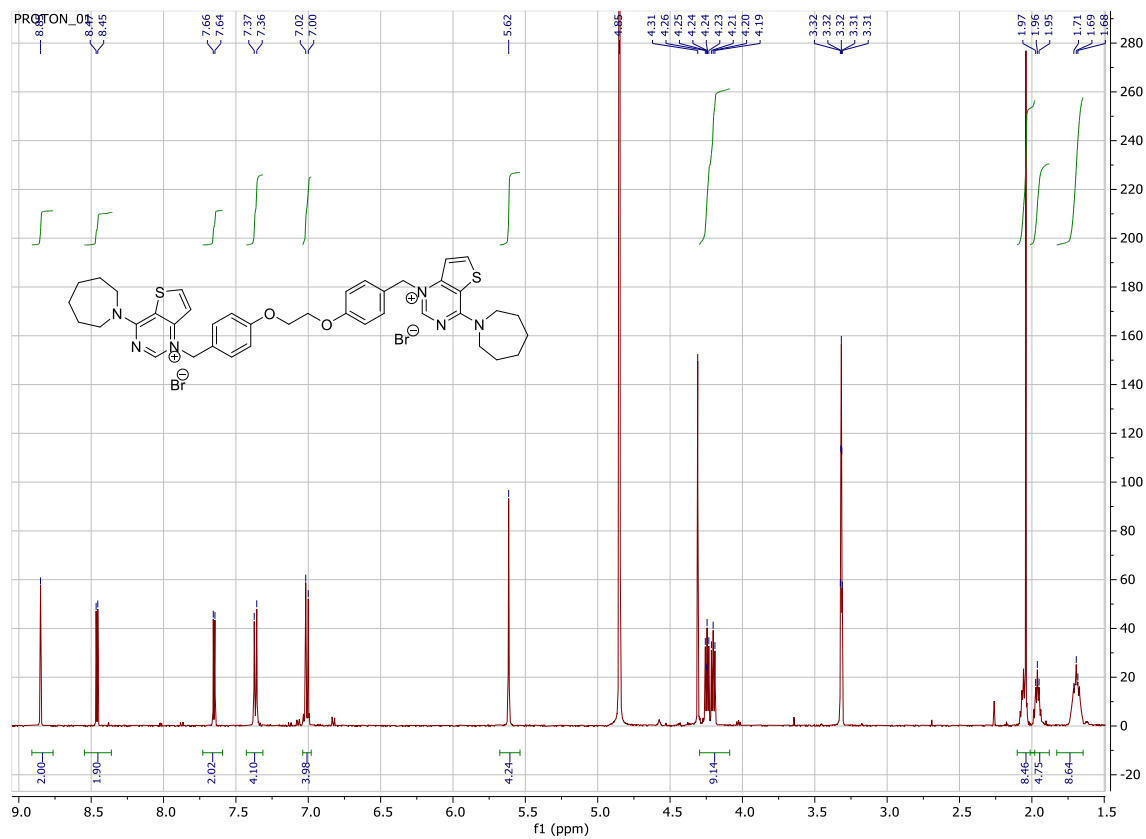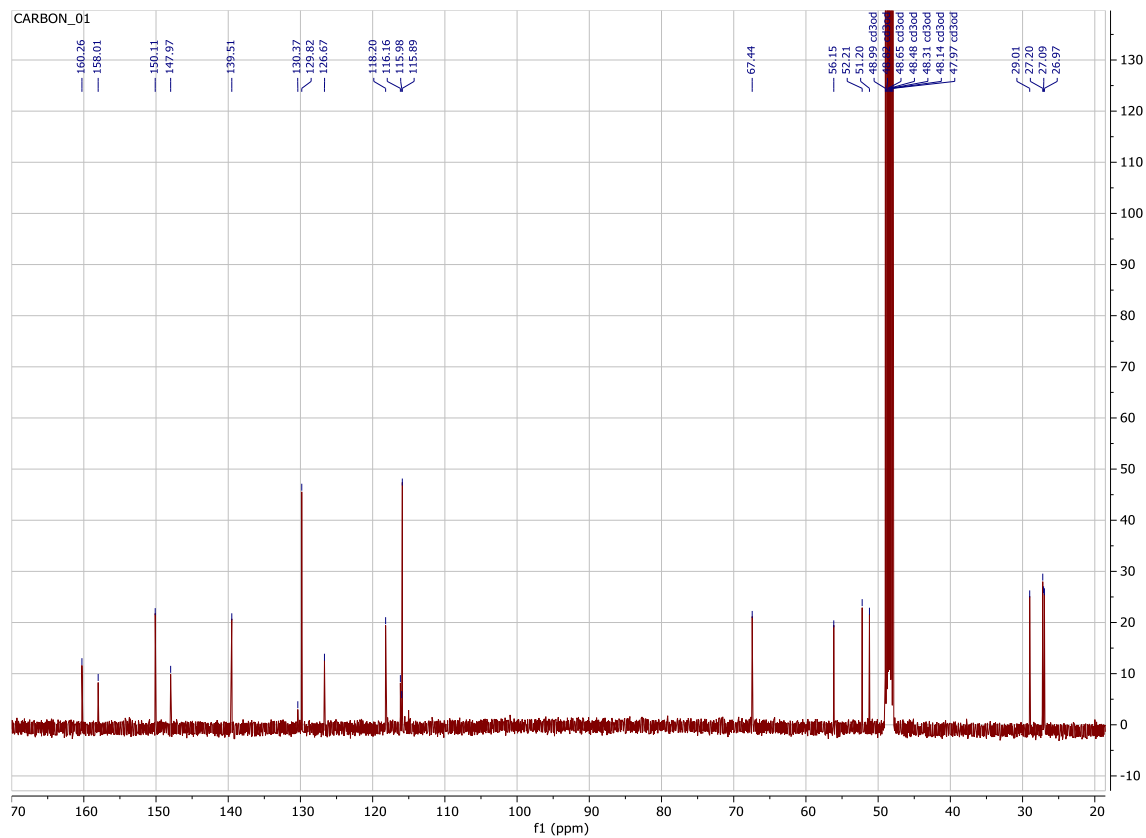

Ff-36

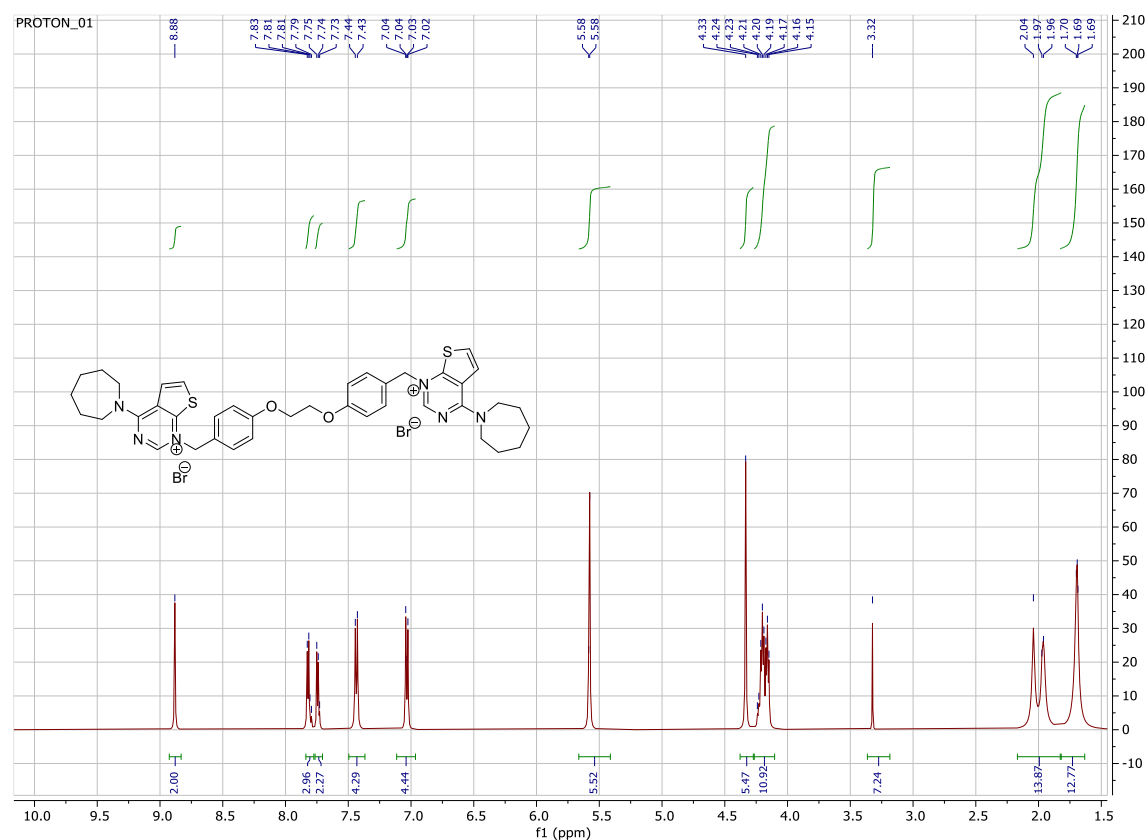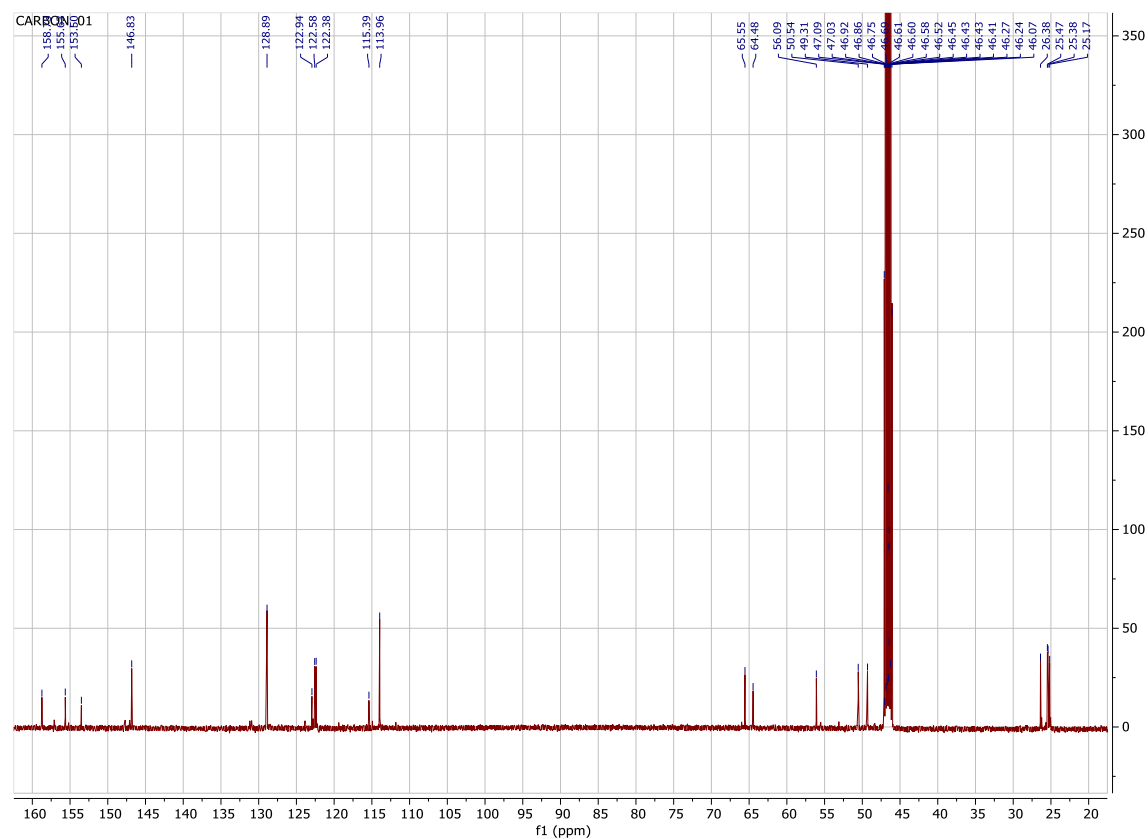

Figure S3. Spectra.
